# Supplementary material for: Asymmetric synthesis of chiral (thio)chromanes and exploration on their structure–activity relationship in macrophages
Source: Royal Society of Chemistry journal article supplement (doi:10.1039/d3ra06428j), 2023-01-01
Supplement: d3ra06428j1.pdf [file d3ra06428j1.pdf]

**Supplementary Materials for**  
**Asymmetric synthesis of chiral (thio)chromanes and exploration on**  
**their structure-activity relationship in macrophages**

Xiao Zhang <sup>#a, b</sup>, Qian Zhou <sup>#c</sup>, Yue Zhou <sup>c</sup>, Zihao Wang <sup>e, f\*</sup>, Jun Wang <sup>b, d</sup> and Mingfu Wang

a, c \*

*a School of Biological Science, The University of Hong Kong, Hong Kong 999077, China*

*b Department of Chemistry, Southern University of Science and Technology, Shenzhen 518055,  
China*

*c Shenzhen Key Laboratory of Food Nutrition and Health, Institute for Advanced Study,  
Shenzhen University, Shenzhen 518060, China*

*d Department of Chemistry, Hong Kong Baptist University, Hong Kong 999077, China*

*e School of Chinese Medicine, Hong Kong Baptist University, Hong Kong 999077, China*

*f. Centre for Chinese Herbal Medicine Drug Development, Hong Kong Baptist University,  
Hong Kong 999077, China*

**This PDF file includes:**

General information

Table S1 to S7

Figure S1

References

## 1. General information

All the air or moisture sensitive reactions and manipulations were performed under an atmosphere of argon by using standard Schlenk techniques and Drybox (Mikrouna, Supper 1220/750).  $^1\text{H}$  NMR and  $^{13}\text{C}$  NMR spectra were recorded on Bruker-Avance 400 or 500 MHz spectrometer.  $\text{CDCl}_3$  was used as solvent. Chemical shifts ( $\delta$ ) were reported in ppm with tetramethylsilane as internal standard, and  $J$  values were given in Hz. The following abbreviations were used to explain the multiplicities: s = singlet, d = doublet, dd = double of doublets, t = triplet, q = quartet, m = multiplet. Flash column chromatograph was carried out using 200-300 mesh silica gel at medium pressure. High resolution mass spectra (HRMS) were recorded on a LC-TOF spectrometer. ESI-HRMS data were acquired using a Thermo LTQ Orbitrap XL Instrument equipped with an ESI source. Optical rotation was obtained on a Rudolph Research Analytical (Atopol D). HPLC analysis was performed on Agilent 1260 series, UV detection monitored at 230 or 220 nm. Tetrahydrofuran was distilled over sodium.

## 2. Preparation of substrates

The substrate allyl phosphate was prepared according to the literature <sup>1</sup>.

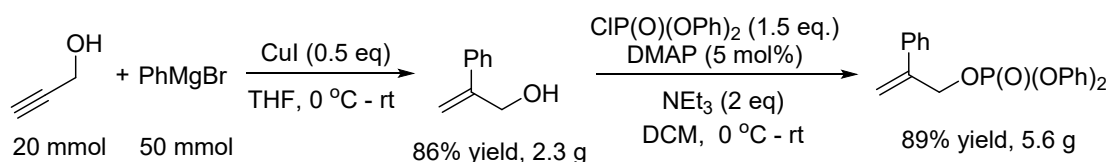

Reaction procedure: To add CuI (10 mmol, 1.95 g) to a 250 mL two-mouth flask, and the flask was evacuated and backfilled with nitrogen for three times, then to add 30 mL THF to the flask and add phenyl magnesium bromide (PhMgBr, 50 mmol, 50 mL) at 0 °C. After stirring for half an hour, propargyl alcohol (20 mmol, 2.9 mL) solution was added dropwise at 0 °C. Then the mixture was allowed to stir at rt for 20 h. The reaction was quenched carefully by aqueous saturated  $\text{NH}_4\text{Cl}$  solution in ice-water bath. The biphasic system was extracted by ethyl acetate for three times (100 mL x 3) and then the combined organic phase was washed by brine for three times (100 mL x 3). The organic phase was dried over  $\text{MgSO}_4$ , concentrated in vacuo and the residue was purified by

silica gel column chromatography (pe/ea = 20/1, v/v)) to provide allyl alcohol (17.2 mmol, 2.3 g).

To add DCM (30 mL) to a 100 mL round-bottom flask containing the substrate allyl alcohol and stir. And then to add phenyl chlorophosphate (25.8 mmol, 5.5 mL) and DMAP (0.86 mmol, 0.235 g). Then triethylamine (34.4 mol, 4.5 mL) was added dropwise at 0 °C and then stirred at rt for 2 h. The reaction was quenched carefully by aqueous saturated NaHCO<sub>3</sub> solution. The biphase system was extracted by DCM for three times (100 mL x 3) and then the combined organic phase was washed by brine for three times (100 mL x 3). The organic phase was dried over MgSO<sub>4</sub>, concentrated in vacuo and the residue was purified by silica gel column chromatography (PE/EA = 10/1, v/v) to provide allyl phosphate (15.3 mmol, 5.6 g).

### 3. Preparation for 4-allyl chromanes compounds

The specific operation of copper(I) hydride-catalyzed hydroallylation was as follows:

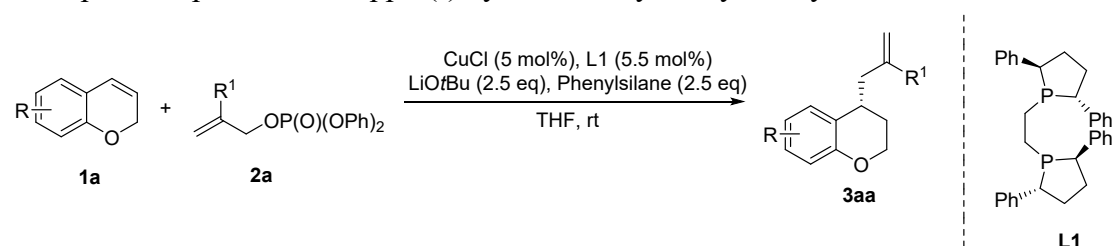

CuCl (0.01 mmol, 1.0 mg), L1 (0.011mmol, 5.6 mg) and THF (0.5 mL) were added into the reaction tube (10.0 mL) in a glove box filled with argon atmosphere. After stirring for 10 min at room temperature, phenylsilane (0.5 mol) was added, followed by stirring for 10 min at room temperature, followed by allyl phosphate (0.5 mmol), LiOtBu (0.5 mmol, 40.0 mg), and chromene (0.2 mmol). The reaction tube was removed from the glove box and stirred at rt for 24 h. At the end of the reaction, the reaction was filtered through the funnel with EA and concentrated in vacuo and the residue was purified by silica gel column chromatography (PE) to provide chromane compound. The ee value of the product was determined by HPLC. Diastereomeric ratio was determined by <sup>1</sup>H NMR.

### 4. Characterization data (<sup>1</sup>H NMR, <sup>13</sup>C NMR, <sup>19</sup>F NMR, HRMS, and HPLC) of the products

**(R)-4-(2-phenylallyl)chromane (3aa)**

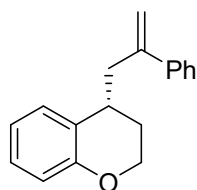

**Colorless oil, 91% yield;**  $[\alpha]_{\text{D}}^{20} = -4.6$  ( $c = 7.4$ ,  $\text{CHCl}_3$ ); ee was determined to be 99% by HPLC analysis with a Chiralcel OD-H column (hexane/2-propanol = 95/5, 1.0 mL/min, 254 nm); tr (major) = 5.389 min;  $^1\text{H NMR}$  (400 MHz,  $\text{CDCl}_3$ )  $\delta$  7.52 (d,  $J = 7.1$  Hz, 2H), 7.41 (t,  $J = 7.4$  Hz, 2H), 7.35 (d,  $J = 7.2$  Hz, 1H), 7.20 (d,  $J = 9.3$  Hz, 1H), 7.11 (d,  $J = 7.0$  Hz, 1H), 6.90 (d,  $J = 7.4$  Hz, 1H), 6.86 - 6.79 (m, 1H), 5.40 (s, 1H), 5.11 (s, 2H), 4.33 - 4.04 (m, 2H), 3.21 (dd,  $J = 14.0, 3.9$  Hz, 1H), 2.88 (dq,  $J = 10.1, 4.9$  Hz, 1H), 2.60 (dd,  $J = 14.3, 10.8$  Hz, 1H), 2.00 - 1.77 (m, 2H).  $^{13}\text{C NMR}$  (100 MHz,  $\text{CDCl}_3$ )  $\delta$  154.18, 146.30, 141.21, 140.56, 133.35, 128.76, 128.64, 127.79, 127.78, 126.81, 126.63, 126.37, 117.23, 115.21, 63.35, 42.77, 31.61, 26.06. **HRMS (ESI) m/z: calcd for  $\text{C}_{18}\text{H}_{18}\text{O}$  M250.1358, found 250.1350.**

**(R)-6-methoxy-4-(2-phenylallyl)chromane (3ab)**

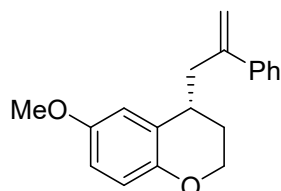

**Colorless oil, 64% yield;**  $[\alpha]_{\text{D}}^{20} = -117.2$  ( $c = 5$ ,  $\text{CHCl}_3$ ); ee was determined to be 95% by HPLC analysis with a Chiralcel OD-H column (hexane/2-propanol = 98/2, 1.0 mL/min, 254 nm); tr (major) = 7.465 min;  $^1\text{H NMR}$  (400 MHz,  $\text{CDCl}_3$ )  $\delta$  7.52 - 7.46 (m, 2H), 7.43 - 7.35 (m, 2H), 7.35 - 7.29 (m, 1H), 6.78 - 6.66 (m, 3H), 5.38 (d,  $J = 1.8$  Hz, 1H), 5.10 (td,  $J = 1.6, 0.8$  Hz, 1H), 4.19 - 4.03 (m, 2H), 3.77 (s, 3H), 3.18 (ddd,  $J = 14.5, 4.7, 1.5$  Hz, 1H), 2.84 (dq,  $J = 10.4, 5.1$  Hz, 1H), 2.64 - 2.54 (m, 1H), 1.90 (dddd,  $J = 14.7, 9.3, 5.8, 3.7$  Hz, 1H), 1.79 (dtd,  $J = 13.9, 5.4, 3.0$  Hz, 1H).  $^{13}\text{C NMR}$  (100 MHz,  $\text{CDCl}_3$ )  $\delta$  153.18, 148.60, 146.31, 140.53, 128.58, 127.73, 126.84, 126.31, 117.25, 115.10, 114.08, 113.11, 63.20, 55.80, 42.79, 31.71, 26.16. **HRMS (ESI) m/z: calcd for  $\text{C}_{19}\text{H}_{20}\text{O}_2$  M280.1463, found 280.1450.**

**(R)-6-methyl-4-(2-phenylallyl)chromane (3ac)**

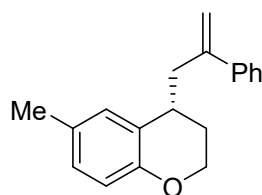

**Colorless oil, 67% yield;**  $[\alpha]^{20}_D = -270.6$  ( $c = 4.1$ ,  $\text{CHCl}_3$ ); ee was determined to be 98% by HPLC analysis with a Chiralcel OD-H column (hexane/2-propanol = 98/2, 1.0 mL/min, 254 nm); tr (major) = 4.544 min;  $^1\text{H NMR}$  (400 MHz,  $\text{CDCl}_3$ )  $\delta$  7.56 - 7.50 (m, 2H), 7.47 - 7.39 (m, 2H), 7.38 - 7.32 (m, 1H), 7.01 (d,  $J = 2.1$  Hz, 1H), 6.94 (dd,  $J = 8.3, 2.2$  Hz, 1H), 6.74 (d,  $J = 8.2$  Hz, 1H), 5.41 (d,  $J = 1.5$  Hz, 1H), 5.13 (d,  $J = 1.6$  Hz, 1H), 4.25 - 4.00 (m, 2H), 3.23 (ddd,  $J = 14.3, 4.4, 1.4$  Hz, 1H), 2.86 (dq,  $J = 10.2, 5.0$  Hz, 1H), 2.60 (dd,  $J = 14.3, 11.0$  Hz, 1H), 2.32 (s, 3H), 1.88 (dtd,  $J = 25.2, 5.5, 3.5$  Hz, 2H).  $^{13}\text{C NMR}$  (100 MHz,  $\text{CDCl}_3$ )  $\delta$  152.30, 146.38, 140.63, 129.27, 128.55, 128.08, 127.69, 126.33, 125.84, 116.56, 114.99, 63.14, 42.73, 31.39, 25.97, 20.65. **HRMS (ESI) m/z: calcd for  $\text{C}_{19}\text{H}_{20}\text{O}$  M264.1514, found 264.1509.**

**(R)-6-bromo-4-(2-phenylallyl)chromane (3ad)**

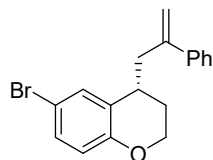

**Colorless oil, 66% yield;**  $[\alpha]^{20}_D = +43.3$  ( $c = 5$ ,  $\text{CHCl}_3$ ); ee was determined to be 99% by HPLC analysis with a Chiralcel IC column (hexane/2-propanol = 95/5, 1.0 mL/min, 254 nm); tr (major) = 5.194 min;  $^1\text{H NMR}$  (400 MHz,  $\text{CDCl}_3$ )  $\delta$  7.52 - 7.47 (m, 2H), 7.45 - 7.38 (m, 2H), 7.38 - 7.31 (m, 1H), 7.28 (s, 2H), 7.19 (dd,  $J = 8.7, 2.4$  Hz, 1H), 6.70 (d,  $J = 8.7$  Hz, 1H), 5.39 (s, 1H), 5.11 (s, 1H), 4.21 - 4.08 (m, 2H), 3.16 (dd,  $J = 14.1, 4.0$  Hz, 1H), 2.84 (dd,  $J = 10.5, 5.2$  Hz, 1H), 2.58 (dd,  $J = 14.2, 10.7$  Hz, 1H), 1.96 - 1.75 (m, 2H).  $^{13}\text{C NMR}$  (100 MHz,  $\text{CDCl}_3$ )  $\delta$  153.63, 145.92, 140.31, 131.51, 130.26, 128.63, 128.25, 127.81, 126.29, 118.66, 115.38, 112.09, 63.27, 42.56, 31.37, 25.52. **HRMS (ESI) m/z: calcd for  $\text{C}_{18}\text{H}_{17}\text{OBr}$  M328.0463, found 328.0448; calcd for  $\text{C}_{18}\text{H}_{17}\text{O}^{81}\text{Br}$  M330.0442, found 330.0430.**

**(R)-6-chloro-4-(2-phenylallyl)chromane (3ae)**

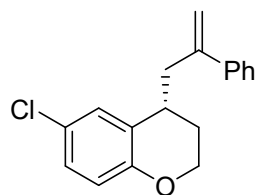

**Colorless oil, 70% yield;**  $[\alpha]^{20}_{\text{D}} = -14.1$  ( $c = 5$ ,  $\text{CHCl}_3$ ); ee was determined to be 97% by HPLC analysis with a Chiralcel ODH column (hexane/2-propanol = 98/2, 1.0 mL/min, 254 nm); tr (major) = 4.963 min;  $^1\text{H NMR}$  (500 MHz,  $\text{CDCl}_3$ )  $\delta$  7.52 - 7.47 (m, 2H), 7.42 (dd,  $J = 8.4, 6.8$  Hz, 2H), 7.38 - 7.32 (m, 1H), 7.16 - 7.12 (m, 1H), 7.06 (dd,  $J = 8.7, 2.6$  Hz, 1H), 6.75 (d,  $J = 8.7$  Hz, 1H), 5.40 (d,  $J = 1.3$  Hz, 1H), 5.11 (d,  $J = 1.5$  Hz, 1H), 4.22 - 4.09 (m, 2H), 3.17 (ddd,  $J = 14.3, 4.7, 1.4$  Hz, 1H), 2.84 (dq,  $J = 10.3, 5.1$  Hz, 1H), 2.58 (dd,  $J = 14.3, 10.7$  Hz, 1H), 1.97 - 1.77 (m, 2H).  $^{13}\text{C NMR}$  (125 MHz,  $\text{CDCl}_3$ )  $\delta$  153.12, 145.94, 140.33, 128.63, 128.56, 127.80, 127.66, 127.38, 126.29, 124.75, 118.17, 115.36, 63.30, 42.57, 31.42, 25.58. **HRMS (ESI) m/z: calcd for  $\text{C}_{18}\text{H}_{17}\text{OCl}$  M284.0968, found 284.0961; calcd for  $\text{C}_{18}\text{H}_{17}\text{O}^{37}\text{Cl}$  M286.0938, found 286.0933.**

**(R)-6-phenyl-4-(2-phenylallyl)chromane (3af)**

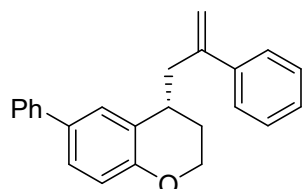

**Colorless oil, 72% yield;**  $[\alpha]^{20}_{\text{D}} = +33.1$  ( $c = 5$ ,  $\text{CHCl}_3$ ); ee was determined to be 75% by HPLC analysis with a Chiralcel AD-H column (hexane/2-propanol = 98/2, 1.0 mL/min, 254 nm); tr (major) = 9.055 min;  $^1\text{H NMR}$  (500 MHz,  $\text{CDCl}_3$ )  $\delta$  7.54 - 7.51 (m, 2H), 7.51 - 7.47 (m, 2H), 7.43 - 7.38 (m, 3H), 7.37 - 7.35 (m, 3H), 7.32 - 7.29 (m, 2H), 6.88 - 6.85 (m, 1H), 5.37 (s, 1H), 5.09 (s, 1H), 4.16 (dddd,  $J = 24.2, 11.0, 5.3, 3.4$  Hz, 2H), 3.22 (ddd,  $J = 14.3, 4.8, 1.5$  Hz, 1H), 2.92 (dq,  $J = 10.3, 5.0$  Hz, 1H), 2.62 (dd,  $J = 14.4, 10.6$  Hz, 1H), 1.97 - 1.88 (m, 1H), 1.85 - 1.80 (m, 1H).  $^{13}\text{C NMR}$  (125 MHz,  $\text{CDCl}_3$ )  $\delta$  154.21, 146.32, 141.23, 140.58, 135.82, 133.37, 128.79, 128.67, 127.82, 127.80, 126.83, 126.69, 126.66, 126.40, 117.26, 115.24, 63.37, 42.78, 31.63, 26.08. **HRMS (ESI) m/z: calcd for  $\text{C}_{24}\text{H}_{22}\text{O}$  M326.1671, found 326.1668.**

**(R)-4-(2-phenylallyl)-3,4-dihydro-2H-benzo[h]chromene (3ag)**

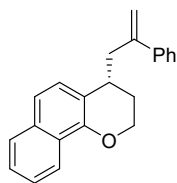

**Colorless oil, 70% yield;**  $[\alpha]_{\text{D}}^{20} = -42.1$  ( $c = 5$ ,  $\text{CHCl}_3$ ); ee was determined to be 97% by HPLC analysis with a Chiralcel IC column (hexane/2-propanol = 99/1, 0.5 mL/min, 254 nm); tr (major) = 9.040 min;  $^1\text{H NMR}$  (400 MHz,  $\text{CDCl}_3$ )  $\delta$  8.26 - 8.19 (m, 1H), 7.83 - 7.75 (m, 1H), 7.60 - 7.56 (m, 2H), 7.51 - 7.47 (m, 2H), 7.47 - 7.42 (m, 2H), 7.42 - 7.35 (m, 2H), 7.31 (d,  $J = 8.5$  Hz, 1H), 5.44 (d,  $J = 1.4$  Hz, 1H), 5.16 (q,  $J = 1.2$  Hz, 1H), 4.45 - 4.31 (m, 2H), 3.32 (ddd,  $J = 14.4, 4.3, 1.4$  Hz, 1H), 3.01 (dq,  $J = 9.8, 4.4$  Hz, 1H), 2.65 (dd,  $J = 14.4, 10.9$  Hz, 1H), 2.12 - 1.92 (m, 2H).  $^{13}\text{C NMR}$  (100 MHz,  $\text{CDCl}_3$ )  $\delta$  149.53, 146.42, 140.68, 133.19, 128.62, 127.75, 127.38, 127.11, 126.41, 125.84, 125.27, 125.24, 121.70, 119.65, 119.53, 115.12, 63.24, 43.03, 31.56, 25.73. **HRMS (ESI) m/z: calcd for  $\text{C}_{22}\text{H}_{20}\text{O}$   $[\text{M}+\text{H}]^+$  301.1592, found 301.1586.**

**(R)-4-(2-(4-methoxyphenyl)allyl)chromane (3ah)**

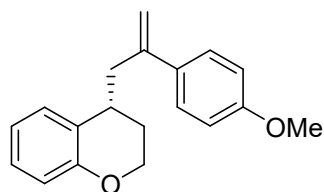

**Colorless oil, 86% yield;**  $[\alpha]_{\text{D}}^{20} = -59.9$  ( $c = 5$ ,  $\text{CHCl}_3$ ); ee was determined to be 98% by HPLC analysis with a Chiralcel OD-H column hexane/2-propanol = 98/2, 1.0 mL/min, 254 nm); tr (major) = 7.624 min;  $^1\text{H NMR}$  (500 MHz,  $\text{CDCl}_3$ )  $\delta$  7.48 (d,  $J = 8.7$  Hz, 2H), 7.24 - 7.19 (m, 1H), 7.16 - 7.11 (m, 1H), 6.98 - 6.94 (m, 2H), 6.91 (td,  $J = 7.5, 1.3$  Hz, 1H), 6.84 (dd,  $J = 8.2, 1.3$  Hz, 1H), 5.34 (s, 1H), 5.04 (s, 1H), 4.33 - 4.09 (m, 2H), 3.87 (s, 3H), 3.19 (ddd,  $J = 14.3, 4.6, 1.4$  Hz, 1H), 2.91 (dq,  $J = 10.2, 5.0$  Hz, 1H), 2.58 (dd,  $J = 14.3, 10.8$  Hz, 1H), 1.99 - 1.78 (m, 2H).  $^{13}\text{C NMR}$  (125 MHz,  $\text{CDCl}_3$ )  $\delta$  159.27, 154.51, 145.53, 132.89, 129.02, 127.41, 126.28, 120.17, 116.82, 113.92, 113.55, 63.19, 55.33, 42.80, 31.41, 25.87. **HRMS (ESI) m/z: calcd for  $\text{C}_{19}\text{H}_{20}\text{O}_2$   $[\text{M}+\text{H}]^+$  280.1463, found 280.1459.**

**(R)-4-(2-(4-(tert-butyl)phenyl)allyl)chromane (3ai)**

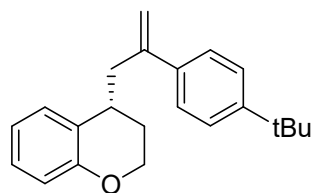

**Colorless oil, 60% yield;**  $[\alpha]_{\text{D}}^{20} = -24.4$  ( $c = 6.2$ ,  $\text{CHCl}_3$ ); ee was determined to be 98% by HPLC analysis with a Chiralcel OD-H column (hexane/2-propanol = 98/2, 1.0 mL/min, 254 nm); tr (major) = 10.784 min;  $^1\text{H NMR}$  (500 MHz,  $\text{CDCl}_3$ )  $\delta$  7.51 - 7.46 (m, 2H), 7.46 - 7.42 (m, 2H), 7.23 (dt,  $J = 7.7, 1.1$  Hz, 1H), 7.16 - 7.10 (m, 1H), 6.92 (td,  $J = 7.4, 1.3$  Hz, 1H), 6.84 (dd,  $J = 8.2, 1.3$  Hz, 1H), 5.41 (s, 1H), 5.08 (s, 1H), 4.26 - 4.10 (m, 2H), 3.22 (ddd,  $J = 14.3, 4.4, 1.4$  Hz, 2H), 2.92 (dq,  $J = 10.2, 5.0$  Hz, 1H), 2.60 (dd,  $J = 14.3, 10.8$  Hz, 1H), 1.98 - 1.82 (m, 2H), 1.38 (s, 9H).  $^{13}\text{C NMR}$  (125 MHz,  $\text{CDCl}_3$ )  $\delta$  154.52, 150.72, 145.85, 137.40, 129.06, 127.37, 126.31, 125.92, 125.46, 120.16, 116.81, 114.34, 63.20, 42.70, 34.57, 31.35 (d,  $J = 3.2$  Hz), 25.92. **HRMS (ESI) m/z: calcd for  $\text{C}_{22}\text{H}_{26}\text{O}$  M306.1984, found 306.1971.**

**(R)-4-(2-(p-tolyl)allyl)chromane (3aj)**

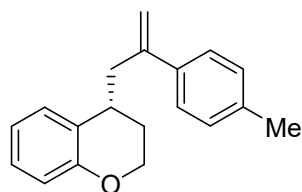

**Colorless oil, 76% yield;**  $[\alpha]_{\text{D}}^{20} = -99.6$  ( $c = 5$ ,  $\text{CHCl}_3$ ); ee was determined to be 94% by HPLC analysis with a Chiralcel OD-H column (hexane/2-propanol = 98/2, 1.0 mL/min, 254 nm); tr (major) = 5.427 min;  $^1\text{H NMR}$  (500 MHz,  $\text{CDCl}_3$ )  $\delta$  7.42 (d,  $J = 8.1$  Hz, 2H), 7.22 (t,  $J = 8.6$  Hz, 3H), 7.14 - 7.11 (m, 1H), 6.92 - 6.89 (m, 1H), 6.83 (d,  $J = 8.1$  Hz, 1H), 5.38 (s, 1H), 5.07 (s, 1H), 4.27 - 4.08 (m, 2H), 3.20 (ddd,  $J = 14.4, 4.6, 1.4$  Hz, 1H), 2.89 (dq,  $J = 10.2, 5.0$  Hz, 1H), 2.58 (dd,  $J = 14.3, 10.8$  Hz, 1H), 5.40 (s, 3H), 2.05 - 1.75 (m, 2H).  $^{13}\text{C NMR}$  (100 MHz,  $\text{CDCl}_3$ )  $\delta$  154.51, 146.05, 137.58, 137.51, 129.26, 129.02, 127.37, 126.19, 120.15, 116.80, 114.29, 63.18, 42.75, 31.38, 25.87, 21.14. **HRMS (ESI) m/z: calcd for  $\text{C}_{19}\text{H}_{20}\text{O}$  M264.1514, found 264.1507.**



**(R)-4-(2-(4-fluorophenyl)allyl)chromane (3ak)**

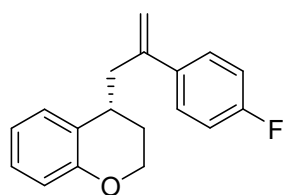

**Colorless oil, 80% yield;**  $[\alpha]_{\text{D}}^{20} = -7.8$  ( $c = 5$ ,  $\text{CHCl}_3$ ); ee was determined to be 97% by HPLC analysis with a Chiralcel OD-H column (hexane/2-propanol = 98/2, 1.0 mL/min, 254 nm); tr (major) = 6.564 min;  $^1\text{H NMR}$  (500 MHz,  $\text{CDCl}_3$ )  $\delta$  7.53 - 7.44 (m, 2H), 7.21 - 7.06 (m, 4H), 6.92 - 6.89 (m, 1H), 6.84 (d,  $J = 8.2$  Hz, 1H), 5.35 (s, 1H), 5.11 (s, 1H), 4.25 - 4.10 (m, 1H), 3.17 (ddd,  $J = 14.4, 4.5, 1.4$  Hz, 1H), 2.89 - 2.84 (m, 1H), 2.60 (dd,  $J = 14.4, 10.7$  Hz, 1H), 1.97 - 1.90 (m, 1H), 1.85 - 1.80 (m, 1H).  $^{13}\text{C NMR}$  (125 MHz,  $\text{CDCl}_3$ )  $\delta$  163.42, 161.46, 154.51, 145.29, 136.62 (d,  $J = 3.5$  Hz), 128.95, 127.91 (d,  $J = 7.9$  Hz), 127.50, 125.99, 120.21, 116.89, 115.45 (d,  $J = 21.3$  Hz), 115.06, 63.12, 42.85, 31.37, 25.88.  $^{19}\text{F NMR}$  (376 MHz,  $\text{CDCl}_3$ )  $\delta$  -114.71. **HRMS (ESI) m/z: calcd for  $\text{C}_{18}\text{H}_{17}\text{OF}$  M268.1263, found 268.1255.**

**(R)-4-(2-(4-chlorophenyl)allyl)chromane (3al)**

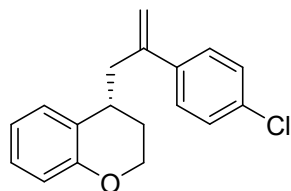

**Colorless oil, 51% yield;**  $[\alpha]_{\text{D}}^{20} = -63.7$  ( $c = 5.8$ ,  $\text{CHCl}_3$ ); ee was determined to be 97% by HPLC analysis with a Chiralcel OD-H column (hexane/2-propanol = 98/2, 1.0 mL/min, 254 nm); tr (major) = 7.192 min;  $^1\text{H NMR}$  (500 MHz,  $\text{CDCl}_3$ )  $\delta$  7.46 - 7.42 (m, 2H), 7.40 - 7.36 (m, 2H), 7.18 - 7.10 (m, 2H), 6.90 (td,  $J = 7.4, 1.3$  Hz, 1H), 6.83 (dd,  $J = 8.2, 1.3$  Hz, 1H), 5.39 (d,  $J = 1.2$  Hz, 1H), 5.13 (d,  $J = 1.5$  Hz, 1H), 4.24 - 4.12 (m, 2H), 3.16 (ddd,  $J = 14.4, 4.6, 1.4$  Hz, 1H), 2.85 (dq,  $J = 10.3, 5.0$  Hz, 1H), 2.59 (dd,  $J = 14.4, 10.8$  Hz, 1H), 1.99 - 1.76 (m, 2H).  $^{13}\text{C NMR}$  (125 MHz,  $\text{CDCl}_3$ )  $\delta$  154.48, 145.19, 139.00, 133.52, 128.93, 128.74, 127.62, 127.51, 125.89, 120.21, 116.89, 115.60, 63.09, 42.63, 31.38, 25.89. **HRMS (ESI) m/z: calcd for  $\text{C}_{18}\text{H}_{17}\text{OCl}$  M284.0968, found 284.0962; calcd for  $\text{C}_{18}\text{H}_{17}\text{O}^{37}\text{Cl}$  M286.0938, found 286.0930.**

**(R)-4-(2-(o-tolyl)allyl)chromane (3am)**

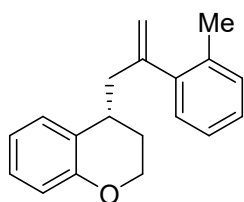

**Colorless oil, 82% yield;**  $[\alpha]_{\text{D}}^{20} = -82.8$  ( $c = 5.5$ ,  $\text{CHCl}_3$ ); ee was determined to be 99% by HPLC analysis with a Chiralcel OD-H column (hexane/2-propanol = 98/2, 1.0 mL/min, 254 nm); tr (major) = 5.066 min;  $^1\text{H NMR}$  (500 MHz,  $\text{CDCl}_3$ )  $\delta$  7.27 - 7.17 (m, 4H), 7.13 - 7.08 (m, 1H), 7.08 - 7.06 (m, 1H), 6.88 - 6.85 (m, 1H), 6.84 - 6.81 (m, 1H), 5.29 (s, 1H), 5.08 (s, 1H), 4.25 - 4.15 (m, 2H), 3.05 - 2.97 (m, 1H), 2.84 - 2.73 (m, 1H), 2.56 (dd,  $J = 14.4, 11.2$  Hz, 1H), 2.42 (s, 3H), 2.11 - 1.91 (m, 2H).  $^{13}\text{C NMR}$  (125 MHz,  $\text{CDCl}_3$ )  $\delta$  154.65, 147.67, 141.92, 134.89, 130.50, 129.13, 128.45, 127.35, 127.16, 126.23, 125.70, 120.25, 116.81 (d), 63.04, 45.22, 31.26, 25.94, 20.16. **HRMS (ESI) m/z: calcd for  $\text{C}_{19}\text{H}_{20}\text{O}$  M264.1514, found 264.1513.**

**(R)-4-(2-(m-tolyl)allyl)chromane (3an)**

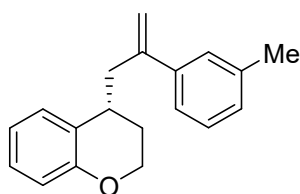

**Colorless oil, 82% yield;**  $[\alpha]_{\text{D}}^{20} = -9.8$  ( $c = 5$ ,  $\text{CHCl}_3$ ); ee was determined to be >99% by HPLC analysis with a Chiralcel OD-H column (hexane/2-propanol = 98/2, 1.0 mL/min, 254 nm); tr (major) = 5.517 min;  $^1\text{H NMR}$  (500 MHz,  $\text{CDCl}_3$ )  $\delta$  7.33 - 7.24 (m, 3H), 7.17 (d,  $J = 7.7$  Hz, 1H), 7.13 - 7.07 (m, 2H), 6.87 (q,  $J = 10.2, 7.4$  Hz, 1H), 6.79 (d,  $J = 8.1$  Hz, 1H), 5.35 (s, 1H), 5.05 (s, 1H), 4.21 - 4.08 (m, 2H), 3.21 - 3.05 (m, 1H), 2.92 - 2.82 (m, 1H), 2.59 - 2.52 (m, 1H), 2.38 (s, 3H), 1.95 - 1.74 (m, 2H).  $^{13}\text{C NMR}$  (125 MHz,  $\text{CDCl}_3$ )  $\delta$  154.57, 146.44, 140.60, 138.15, 129.06, 128.53, 128.49, 127.44, 127.15, 126.31, 123.44, 120.22, 116.87, 114.90, 63.23, 42.82, 31.43, 25.94, 21.65. **HRMS (ESI) m/z: calcd for  $\text{C}_{19}\text{H}_{20}\text{O}$  M264.1514, found 264.1508.**

**(R)-4-(2-(3,4-dimethoxyphenyl)allyl)chromane (3ao)**

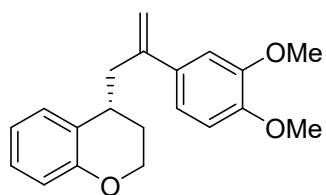

**Colorless oil, 50% yield;**  $[\alpha]_{\text{D}}^{20} = -49.7$  ( $c = 5.2$ ,  $\text{CHCl}_3$ ); ee was determined to be 98% by HPLC analysis with a Chiralcel OD-H column (hexane/2-propanol = 98/2, 1.0 mL/min, 254 nm); tr (major) = 12.089 min;  $^1\text{H NMR}$  (400 MHz,  $\text{CDCl}_3$ )  $\delta$  8.24 - 8.14 (m, 3H), 7.86 - 7.76 (m, 2H), 7.31 - 7.26 (m, 2H), 7.12 (ddd,  $J = 8.1, 7.1, 1.2$  Hz, 1H), 7.03 (ddd,  $J = 8.1, 7.0, 1.0$  Hz, 1H), 3.50 (s, 3H), 1.75 - 1.67 (m, 2H), 1.61 - 1.57 (m, 1H), 1.35 (s, 3H), 1.29 (s, 3H), 0.84 - 0.75 (m, 3H).  $^{13}\text{C NMR}$  (100 MHz,  $\text{CDCl}_3$ )  $\delta$  184.68, 182.10, 164.45, 143.87 (d), 141.39, 134.62, 134.18 (d), 132.06 (d), 128.13, 127.23, 126.55, 121.98, 119.96, 118.72, 110.22, 102.76, 52.27, 37.22 (d), 27.41 (d), 9.21. **HRMS (ESI) m/z: calcd for  $\text{C}_{20}\text{H}_{22}\text{O}_3$  M310.1569, found 310.1565.**

**(R)-4-(2-(3,5-dimethoxyphenyl)allyl)chromane (3ap)**

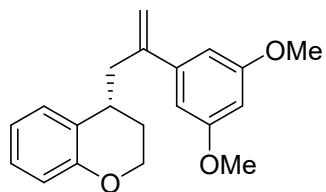

**Colorless oil, 85% yield;**  $[\alpha]_{\text{D}}^{20} = -39.9$  ( $c = 5.4$ ,  $\text{CHCl}_3$ ); ee was determined to be 92% by HPLC analysis with a Chiralcel OD-H column (hexane/2-propanol = 98/2, 1.0 mL/min, 254 nm); tr (major) = 4.317 min;  $^1\text{H NMR}$  (500 MHz,  $\text{CDCl}_3$ )  $\delta$  7.19 - 7.15 (m, 1H), 7.11 - 7.06 (m, 3H), 6.95 (s, 1H), 6.87 (td,  $J = 7.4, 1.3$  Hz, 1H), 6.79 (dd,  $J = 8.1, 1.3$  Hz, 1H), 5.33 (d,  $J = 1.7$  Hz, 1H), 5.03 (s, 1H), 4.21 - 4.03 (m, 2H), 3.16 (ddd,  $J = 14.4, 4.5, 1.5$  Hz, 1H), 2.86 (dq,  $J = 10.2, 5.0$  Hz, 1H), 2.53 (dd,  $J = 14.3, 10.9$  Hz, 1H), 2.34 (s, 6H), 1.95 - 1.73 (m, 2H).  $^{13}\text{C NMR}$  (125 MHz,  $\text{CDCl}_3$ )  $\delta$  154.59, 146.52, 140.64, 138.01, 129.44, 129.04, 127.42, 126.39, 124.25, 120.21, 116.87, 114.68, 63.28, 42.83, 31.43, 25.96, 21.52. **HRMS (ESI) m/z: calcd for  $\text{C}_{20}\text{H}_{22}\text{O}_3$  M310.1569, found 310.1566.**

**(R)-4-(2-(3,5-dimethylphenyl)allyl)chromane (3aq)**

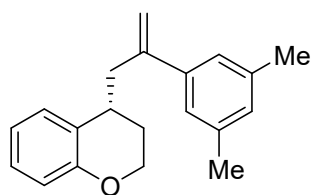

**Colorless oil, 85% yield;**  $[\alpha]_{\text{D}}^{20} = -59.2$  ( $c = 5.4$ ,  $\text{CHCl}_3$ ); ee was determined to be 98% by HPLC analysis with a Chiralcel OD-H column (hexane/2-propanol = 98/2, 1.0 mL/min, 254 nm); tr (major) = 4.411 min;  $^1\text{H NMR}$  (500 MHz,  $\text{CDCl}_3$ )  $\delta$  7.15 - 7.07 (m, 4H), 7.05 (d,  $J = 7.7$  Hz, 1H), 6.88 (t,  $J = 7.4$  Hz, 1H), 6.84 (d,  $J = 8.1$  Hz, 1H), 5.28 (s, 1H), 5.07 (s, 1H), 4.23 - 4.18 (m, 2H), 3.01 (d,  $J = 14.3$  Hz, 1H), 2.82 - 2.77 (m, 1H), 2.61 - 2.52 (m, 1H), 2.41 (s, 3H), 2.39 (s, 3H), 2.08 - 2.01 (m, 1H), 1.99 - 1.92 (m, 1H).  $^{13}\text{C NMR}$  (125 MHz,  $\text{CDCl}_3$ )  $\delta$  154.64, 147.55, 138.94, 136.73, 134.74, 131.32, 129.15, 128.39, 127.31, 126.36 (d,  $J = 9.6$  Hz), 120.23, 116.75, 63.06, 45.34, 31.28, 25.94, 21.08, 20.15. **HRMS (ESI) m/z: calcd for  $\text{C}_{20}\text{H}_{22}\text{O}$  M278.1671, found 278.1665.**

**(R)-4-(2-mesitylallyl)chromane (3ar)**

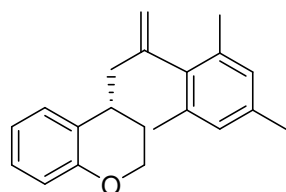

**Colorless oil, 46% yield;**  $[\alpha]_{\text{D}}^{20} = -121.9$  ( $c = 5$ ,  $\text{CHCl}_3$ ); ee was determined to be 53% by HPLC analysis with a Chiralcel OD-H column (hexane/2-propanol = 98/2, 1.0 mL/min, 254 nm); tr (major) = 3.989 min;  $^1\text{H NMR}$  (500 MHz,  $\text{CDCl}_3$ )  $\delta$  7.14 - 7.04 (m, 2H), 6.92 (s, 2H), 6.89 - 6.81 (m, 2H), 5.40 (q,  $J = 1.6$  Hz, 1H), 5.03 (d,  $J = 1.6$  Hz, 1H), 4.32 - 4.14 (m, 2H), 3.04 - 3.00 (m, 1H), 2.78 - 2.69 (m, 1H), 2.53 - 2.48 (m, 1H), 2.36 - 2.26 (m, 9H), 2.24 - 2.15 (m, 1H), 2.12 - 2.07 (m, 1H).  $^{13}\text{C NMR}$  (125 MHz,  $\text{CDCl}_3$ )  $\delta$  154.70, 146.54, 139.40, 136.13, 134.98, 134.77, 129.41, 128.47, 128.39, 127.34, 126.40, 120.35, 116.79, 115.45, 63.05, 44.82, 31.05, 26.45, 20.96, 20.18, 19.92. **HRMS (ESI) m/z: calcd for  $\text{C}_{21}\text{H}_{24}\text{O}$  M292.1827, found 292.1821.**

**(R)-4-(2-(naphthalen-2-yl)allyl)chromane (3as)**

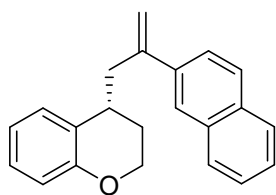

**Colorless oil, 50% yield;**  $[\alpha]_D^{20} = -36.4$  ( $c = 5$ ,  $\text{CHCl}_3$ ); ee was determined to be 96% by HPLC analysis with a Chiralcel OD-H column (hexane/2-propanol = 98/2, 1.0 mL/min, 254 nm); tr (major) = 6.226 min;  $^1\text{H NMR}$  (400 MHz,  $\text{CDCl}_3$ )  $\delta$  7.94 (d,  $J = 1.8$  Hz, 1H), 7.91 - 7.84 (m, 3H), 7.66 (dd,  $J = 8.6, 1.8$  Hz, 1H), 7.55 - 7.46 (m, 2H), 7.26 - 7.21 (m, 1H), 7.16 - 7.07 (m, 1H), 6.94 - 6.87 (m, 1H), 6.83 (dd,  $J = 8.2, 1.3$  Hz, 1H), 5.54 (d,  $J = 1.4$  Hz, 1H), 5.21 (s, 1H), 4.26 - 4.08 (m, 2H), 3.33 (ddd,  $J = 14.2, 4.5, 1.4$  Hz, 1H), 3.00 - 2.88 (m, 1H), 2.75 - 2.62 (m, 1H), 2.00 - 1.80 (m, 2H).  $^{13}\text{C NMR}$  (100 MHz,  $\text{CDCl}_3$ )  $\delta$  154.54, 146.17, 137.88, 133.45, 132.95, 129.00, 128.18 (d), 127.63, 127.46, 126.35, 126.19, 126.06, 125.07, 124.67, 120.21, 116.87, 115.60, 63.22, 42.73, 31.56, 25.99. **HRMS (ESI) m/z: calcd for  $\text{C}_{22}\text{H}_{20}\text{O}$  M300.1514, found 300.1509.**

**(3S,4R)-3-methyl-4-(2-phenylallyl)chromane (3at)**

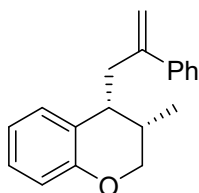

**Colorless oil, 42% yield, >25:1 dr;**  $[\alpha]_D^{20} = +1.7$  ( $c = 5$ ,  $\text{CHCl}_3$ ); ee was determined to be 99% by HPLC analysis with a Chiralcel OD-H column (hexane/2-propanol = 98/2, 1.0 mL/min, 254 nm); tr (major) = 7.192 min;  $^1\text{H NMR}$  (400 MHz,  $\text{CDCl}_3$ )  $\delta$  7.52 - 7.46 (m, 1H), 7.43 - 7.37 (m, 2H), 7.36 - 7.30 (m, 1H), 7.13 - 7.09 (m, 2H), 6.91 - 6.79 (m, 2H), 5.36 (d,  $J = 1.4$  Hz, 1H), 5.06 (s, 1H), 4.19 (dd,  $J = 11.0, 2.3$  Hz, 1H), 3.94 (ddd,  $J = 11.0, 2.7, 1.4$  Hz, 1H), 3.03 (dd,  $J = 14.6, 4.5$  Hz, 1H), 2.69 (dd,  $J = 14.6, 10.2$  Hz, 1H), 2.51 (dd,  $J = 10.1, 4.5$  Hz, 1H), 2.08 - 2.01 (m, 1H).  $^{13}\text{C NMR}$  (100 MHz,  $\text{CDCl}_3$ )  $\delta$  153.73, 146.50, 140.86, 130.56, 128.55, 127.65, 127.29, 126.38, 124.97, 120.34, 116.51, 114.90, 66.78, 44.62, 38.57, 29.00, 17.34. **HRMS (ESI) m/z: calcd for  $\text{C}_{19}\text{H}_{20}\text{O}$  M264.1514, found 264.1506.**

**(4*R*)-4-(2-phenylallyl)-2-(*o*-tolyl)chromane (3au)**

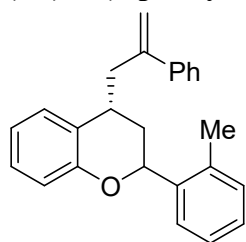

**Colorless oil, 40% yield, 2.8:1 dr;  $[a]_D^{20} = -103.6$  ( $c = 6$ ,  $\text{CHCl}_3$ ); ee was determined to be 98%/96% by HPLC analysis with a Chiralcel OD-H column (hexane/2-propanol = 99/1, 0.8 mL/min, 254 nm); tr (major) = 19.091 and 23.480 min;  $^1\text{H NMR}$  (400 MHz,  $\text{CDCl}_3$ )  $\delta$  7.51 - 7.48 (m, 12H), 7.46 - 7.39 (m, 8H), 7.36 - 7.28 (m, 8H), 7.24 - 7.15 (m, 13H), 7.01 - 6.92 (m, 8H), 5.40 - 5.31 (m, 7H), 5.18 - 5.01 (m, 5H), 3.60 - 3.14 (m, 4H), 3.16 - 3.14 (m, 4H), 2.89 - 2.82 (m, 3H), 2.41 (s, 9H), 2.25 (s, 3H), 2.17 - 2.09 (m, 4H), 1.91 - 1.68 (m, 4H).  $^{13}\text{C NMR}$  (100 MHz,  $\text{CDCl}_3$ )  $\delta$  155.48, 154.95, 146.48, 146.37, 140.53, 140.43, 139.78, 139.54, 134.83, 134.43, 130.46, 130.42, 129.60, 128.63, 128.54, 127.78, 127.73, 127.64, 127.57, 127.47, 127.02, 126.46, 126.37, 126.28, 125.97, 125.92, 125.72, 125.56, 120.62, 120.36, 117.25, 117.11, 115.50, 115.11, 74.82, 70.21, 44.10, 41.58, 35.16, 32.96, 32.37, 31.59, 19.17, 18.95. **HRMS (ESI) m/z: calcd for  $\text{C}_{25}\text{H}_{24}\text{O}$  M340.1827, found 340.1823.****

**(*R*)-4-(2-cyclohexylallyl)chromane (3av)**

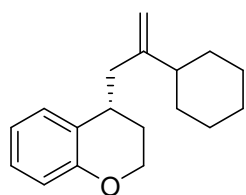

**Colorless oil, 85% yield;  $[a]_D^{20} = +143.0$  ( $c = 5$ ,  $\text{CHCl}_3$ ); ee was determined to be 98% by HPLC analysis with a Chiralcel OD-H column (hexane/2-propanol = 98/2, 1.0 mL/min, 254 nm); tr (major) = 4.277 min;  $^1\text{H NMR}$  (500 MHz,  $\text{CDCl}_3$ )  $\delta$  7.21 - 7.17 (m, 1H), 7.15 - 7.10 (m, 1H), 6.92 - 6.87 (m, 1H), 6.86 - 6.82 (m, 1H), 4.91 (s, 1H), 4.79 (s, 1H), 4.23 - 4.14 (m, 2H), 3.05 - 2.97 (m, 1H), 2.66 (dd,  $J = 14.7, 4.4$  Hz, 1H), 2.26 - 2.17 (m, 1H), 2.08 - 1.98 (m, 1H), 1.98 - 1.91 (m, 2H), 1.89 - 1.77 (m, 4H), 1.77 - 1.71 (m, 1H), 1.39 - 1.24 (m, 4H).  $^{13}\text{C NMR}$  (125 MHz,  $\text{CDCl}_3$ )  $\delta$  154.57, 152.45, 129.16, 127.32, 126.56, 120.14, 116.81, 109.63, 63.22, 43.52, 42.60, 32.95, 32.21,**

31.40, 26.97, 26.76, 26.42, 25.97. **HRMS (ESI) m/z: calcd for C<sub>18</sub>H<sub>24</sub>O M256.1827, found 256.1819.**

**(R)-6-methoxy-4-(2-phenylallyl)thiochromane (3aw)**

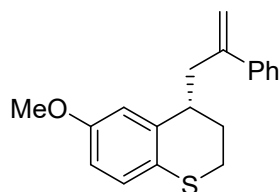

**Colorless oil, 57% yield;**  $[a]^{20}_D = +61.7$  ( $c = 5.1$ ,  $\text{CHCl}_3$ ); ee was determined to be 91% by HPLC analysis with a Chiralcel OD-H column (hexane/2-propanol = 98/2, 1.0 mL/min, 254 nm);  $t_r$  (major) = 7.819 min;  $^1\text{H NMR}$  (400 MHz,  $\text{CDCl}_3$ )  $\delta$  7.52 -7.45 (m, 2H), 7.43 - 7.36 (m, 2H), 7.36 - 7.29 (m, 1H), 7.05 - 7.02 (m, 1H), 6.72 - 6.69 (m, 1H), 6.62 - 6.61 (m, 1H), 5.35 (s, 1H), 5.07 (s, 1H), 3.77 (m, 3H), 3.21 - 3.15 (m, 1H), 3.01 - 2.96 (m, 1H), 2.92 - 2.82(m, 2H), 2.76 - 2.70 (m, 1H), 2.21 - 2.06 (m, 1H), 1.90 - 1.82 (m, 1H).  $^{13}\text{C NMR}$  (100 MHz,  $\text{CDCl}_3$ )  $\delta$ 156.52, 146.21, 140.56, 138.57, 128.58, 127.70, 127.43, 126.38, 123.13, 112.71, 55.38, 40.79, 35.91, 25.32, 22.61. **HRMS (ESI) m/z: calcd for C<sub>19</sub>H<sub>20</sub>SO M296.1235, found 296.1229.**

**(R)-6-methyl-4-(2-phenylallyl)thiochromane (3ax)**

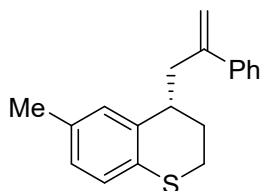

**Colorless oil, 61% yield;**  $[a]^{20}_D = +52.2$  ( $c = 5.3$ ,  $\text{CHCl}_3$ ). ee was determined to be 94% by HPLC analysis with a Chiralcel OD-H column (hexane/2-propanol = 99/1, 0.5 mL/min, 254 nm);  $t_r$  (major) = 9.127 min;  $^1\text{H NMR}$  (400 MHz,  $\text{CDCl}_3$ )  $\delta$  7.52 (s, 2H), 7.44 (s, 2H), 7.38 - 7.31 (m, 1H), 7.05 - 7.00 (m, 1H), 6.92 (m, 1H), 6.86 (m, 1H), 5.36 (m, 1H), 5.11 - 5.05 (m, 1H), 3.26 (s, 1H), 2.99 (m, 1H), 2.93 (m, 2H), 2.77 - 2.67 (m, 1H), 2.29 (m, 3H), 2.16 - 2.06 (m, 1H), 1.90 - 1.78 (m, 1H).  $^{13}\text{C NMR}$  (100 MHz,  $\text{CDCl}_3$ )  $\delta$  146.27, 140.63, 137.02, 133.34, 130.54, 128.57, 127.68, 127.55, 126.42, 115.15, 40.92, 35.4, 24.89, 22.43, 20.92. **HRMS (ESI) m/z: calcd for C<sub>19</sub>H<sub>20</sub>S [M+H]<sup>+</sup>281.1364, found 281.1357.**

**(R)-6-fluoro-4-(2-phenylallyl)thiochromane (3ay)**

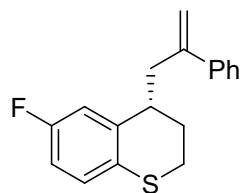

**Colorless oil, 80% yield;**  $[a]_D^{20} = +11.2$  ( $c = 5.1$ ,  $\text{CHCl}_3$ ); ee was determined to be 85% by HPLC analysis with a Chiralcel OJ-3 column (hexane/2-propanol = 99/1, 0.5 mL/min, 254 nm); tr (major) = 24.720 min;  $^1\text{H NMR}$  (400 MHz,  $\text{CDCl}_3$ )  $\delta$  7.51 - 7.49 (m, 2H), 7.45 - 7.42 (m, 2H), 7.38 - 7.36 (m, 1H), 7.09 - 7.07 (m, 1H), 6.86 - 6.82 (m, 1H), 6.80 - 6.78 (m, 1H), 5.38 (s, 1H), 5.08 (s, 1H), 3.24 - 3.19 (m, 1H), 3.00 - 2.96 (m, 1H), 2.94 - 2.86 (m, 2H), 2.75 - 2.71 (m, 1H), 2.15 - 2.09 (m, 1H), 1.87 - 1.84 (m, 1H).  $^{13}\text{C NMR}$  (125 MHz,  $\text{CDCl}_3$ )  $\delta$  145.87, 140.36, 128.66, 127.81, 127.70 (d,  $J = 7.6$  Hz), 126.37, 116.46, 116.29, 115.46, 114.08, 113.91, 40.74, 35.76, 24.92, 22.54.  $^{19}\text{F NMR}$  (376 MHz,  $\text{CDCl}_3$ ):  $\delta$  -119.51. **HRMS (ESI) m/z: calcd for  $\text{C}_{18}\text{H}_{17}\text{SF}$  M284.1035, found 284.1030.**

**(R)-6-chloro-4-(2-phenylallyl)thiochromane (3az)**

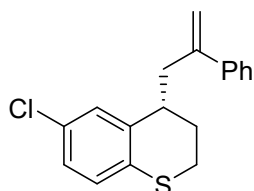

**Colorless oil, 66% yield;**  $[a]_D^{20} = +75.3$  ( $c = 5.8$ ,  $\text{CHCl}_3$ ); ee was determined to be 84% by HPLC analysis with a Chiralcel OD-H column (hexane/2-propanol = 99/1, 0.5 mL/min, 254 nm); tr (major) = 10.670 min;  $^1\text{H NMR}$  (400 MHz,  $\text{CDCl}_3$ )  $\delta$  7.48 - 7.47 (m, 2H), 7.43 - 7.40 (m, 2H), 7.36 - 7.32 (m, 1H), 7.04 (s, 2H), 6.99 (s, 1H), 5.35 (s, 1H), 5.06 (s, 1H), 3.24 - 3.17 (m, 2H), 2.96 - 2.83 (m, 3H), 2.72 - 2.67 (m, 1H), 2.14 - 2.08 (m, 1H), 1.86 - 1.78 (m, 1H).  $^{13}\text{C NMR}$  (100 MHz,  $\text{CDCl}_3$ )  $\delta$  145.81, 140.35, 138.68, 129.58, 129.05, 128.66, 127.81, 127.68, 126.71, 126.38, 115.49, 40.69, 35.5, 24.59, 22.44. **HRMS (ESI) m/z: calcd for  $\text{C}_{19}\text{H}_{20}\text{SCl}$  M300.0739, found 300.0731; calcd for  $\text{C}_{19}\text{H}_{20}\text{S}^{37}\text{Cl}$  M302.0710, found 302.0699.**

**(R)-6-bromo-4-(2-phenylallyl)thiochromane (3ba):**



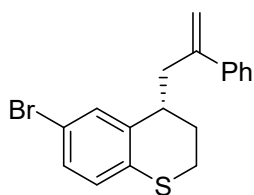

**Colorless oil, 82% yield;**  $[\alpha]_D^{20} = +27.0$  ( $c = 5.2$ ,  $\text{CHCl}_3$ ); ee was determined to be 85% by HPLC analysis with a Chiralcel OD-H column (hexane/2-propanol = 98/2, 1.0 mL/min, 254 nm); tr (major) = 5.416 min;  $^1\text{H NMR}$  (400 MHz,  $\text{CDCl}_3$ )  $\delta$ 7.48 - 7.46 (m, 2H), 7.43 - 7.39 (m, 2H), 7.36 - 7.32 (m, 1H), 7.19 - 7.16 (m, 1H), 7.13 - 7.12 (d,  $J = 1.8$  Hz, 1H), 6.98 - 6.96 (d,  $J = 8.4$  Hz, 1H), 5.35 (s, 1H), 5.05 (s, 1H), 7.30 - 7.32 (m, 1H), 3.23 - 3.16 (m, 1H), 2.95 - 2.83 (m, 3H), 2.71 - 2.66 (m, 1H), 2.14 - 2.08 (m, 1H), 1.85 - 1.77 (m, 1H).  $^{13}\text{C NMR}$  (100 MHz,  $\text{CDCl}_3$ )  $\delta$ 145.80, 140.34, 139.03, 131.56, 129.53, 128.66, 127.98, 127.80, 126.38, 116.76, 115.51, 40.68, 35.44, 24.52, 22.39. **HRMS (ESI) m/z: calcd for  $\text{C}_{18}\text{H}_{17}\text{SBr}$  M344.0234, found 344.0232; calcd for  $\text{C}_{18}\text{H}_{17}\text{S}^{81}\text{Br}$  M346.0214, found 346.0211.**

**(R)-4-(2-(4-methoxyphenyl)allyl)thiochromane (3bb)**

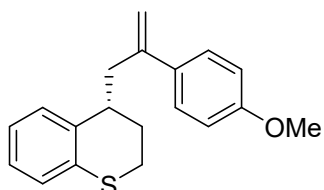

**Colorless oil, 35% yield;**  $[\alpha]_D^{20} = +49.2$  ( $c = 5.3$ ,  $\text{CHCl}_3$ ); ee was determined to be 81% by HPLC analysis with a Chiralcel OD-H column (hexane/2-propanol = 98/2, 1.0 mL/min, 254 nm); tr (major) = 6.947 min;  $^1\text{H NMR}$  (400 MHz,  $\text{CDCl}_3$ )  $\delta$ 7.44 - 7.42 (m, 2H), 7.12 - 6.99 (m, 4H), 6.95 - 6.93 (m, 2H), 0.86 (s, 1H), 4.97 (s, 1H), 3.85 (s, 3H), 3.27 - 3.19 (m, 1H), 2.95 - 2.87 (m, 3H), 2.86 - 2.83 (m, 1H), 2.14 - 2.10 (m, 1H), 1.89 - 1.80 (m, 1H).  $^{13}\text{C NMR}$  (100 MHz,  $\text{CDCl}_3$ )  $\delta$ 159.24, 145.38, 137.2, 132.89, 132.24, 129.91, 127.49, 126.57, 126.51, 123.78, 113.91, 55.33, 41.04, 35.40, 24.71, 22.44. **HRMS (ESI) m/z: calcd for  $\text{C}_{19}\text{H}_{20}\text{OS}$   $[\text{M}+\text{H}]^+$ 297.1313, found 297.1304.**

**(R)-4-(2-(4-chlorophenyl)allyl)thiochromane (3bc)**

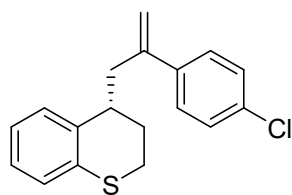

**Colorless oil, 50% yield;**  $[\alpha]_D^{20} = -20.6$  ( $c = 4$ ,  $\text{CHCl}_3$ ); ee was determined to be 89% by HPLC analysis with a Chiralcel OD-H column (hexane/2-propanol = 98/2, 1.0 mL/min, 254 nm); tr (major) = 7.556 min;  $^1\text{H NMR}$  (400 MHz,  $\text{CDCl}_3$ )  $\delta$  7.42 - 7.35 (m, 4H), 7.12 - 7.05 (m, 2H), 7.01 - 6.96 (m, 2H), 5.35 (s, 1H), 5.07 (s, 1H), 3.24 - 3.17 (m, 1H), 2.92 - 2.85 (m, 3H), 2.72 - 2.65 (m, 1H), 2.13 - 2.06 (m, 1H), 1.90 - 1.81 (m, 1H).  $^{13}\text{C NMR}$  (100 MHz,  $\text{CDCl}_3$ )  $\delta$  145.05, 139.00, 136.83, 133.47, 132.24, 129.83, 128.73, 127.68, 126.68, 126.58, 123.82, 115.72, 40.76, 35.49, 24.82, 22.41. **HRMS (ESI) m/z: calcd for  $\text{C}_{18}\text{H}_{17}\text{SCl}$  M300.0739, found 300.0731; calcd for  $\text{C}_{18}\text{H}_{17}\text{S}^{37}\text{Cl}$  M302.0710, found 302.0703.**

**(R)-4-(2-(*o*-tolyl)allyl)thiochromane (3bd)**

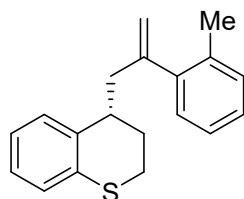

**Colorless oil, 65% yield;**  $[\alpha]_D^{20} = -119.6$  ( $c = 5$ ,  $\text{CHCl}_3$ ); ee was determined to be 96% by HPLC analysis with a Chiralcel OD-H column (hexane/2-propanol = 98/2, 1.0 mL/min, 254 nm); tr (major) = 4.922 min;  $^1\text{H NMR}$  (400 MHz,  $\text{CDCl}_3$ )  $\delta$  7.27 - 7.24 (m, 4H), 7.16 - 7.14 (m, 1H), 7.11 - 7.07 (m, 1H), 7.03 - 6.98 (m, 1H), 5.30 (s, 1H), 5.10 (s, 1H), 3.28 - 3.21 (m, 1H), 2.94 - 2.82 (m, 3H), 2.73 - 2.66 (m, 1H), 2.74 (s, 3H), 2.30 - 2.25 (m, 1H), 2.01 - 1.93 (m, 1H).  $^{13}\text{C NMR}$  (100 MHz,  $\text{CDCl}_3$ )  $\delta$  147.44, 141.83, 137.50, 134.95, 132.49, 130.61, 129.82, 128.56, 127.21, 126.59, 125.74, 123.97, 117.00, 43.12, 35.53, 24.92, 22.63, 20.30. **HRMS (ESI) m/z: calcd for  $\text{C}_{19}\text{H}_{20}\text{S}$  M280.1286, found 280.1278.**

**(R)-triisopropyl((4-(2-phenylallyl)chroman-6-yl)ethynyl)silane (3be)**

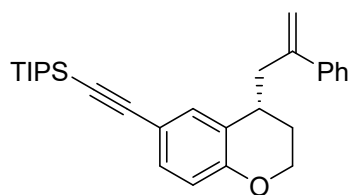

**Colorless oil, 40% yield;**  $[\alpha]_{\text{D}}^{20} = -76.8$  ( $c = 5.2$ ,  $\text{CHCl}_3$ ). ee was determined to be 99% by HPLC analysis with a Chiralcel OD-H column (hexane/2-propanol = 99/1, 0.2 mL/min, 254 nm); tr (major) = 18.134 min;  $^1\text{H NMR}$  (500 MHz,  $\text{CDCl}_3$ )  $\delta$  7.50 - 7.46 (m, 2H), 7.41 - 7.36 (m, 2H), 7.34 - 7.29 (m, 1H), 7.27 (d,  $J = 2.0$  Hz, 1H), 7.21 (dd,  $J = 8.4, 2.1$  Hz, 1H), 6.71 (d,  $J = 8.4$  Hz, 1H), 5.36 (s, 1H), 5.08 (s, 1H), 4.24 - 4.04 (m, 2H), 3.16 (ddd,  $J = 14.4, 4.9, 1.5$  Hz, 1H), 2.89 - 2.75 (m, 1H), 2.66 - 2.50 (m, 1H), 1.96 - 1.72 (m, 2H), 1.14 (s, 21H).  $^{13}\text{C NMR}$  (125 MHz,  $\text{CDCl}_3$ )  $\delta$  154.77, 146.07, 140.44, 132.90, 131.51, 128.61, 127.78, 126.36, 126.02, 116.87, 115.29, 115.07, 107.49, 88.21, 63.41, 42.42, 31.18, 25.76, 18.75, 11.41. **HRMS (ESI) m/z: calcd for  $\text{C}_{29}\text{H}_{38}\text{OSi}$   $[\text{M}+\text{H}]^+$  431.2770, found 431.2761.**

**(*R*)-4-(2-phenylallyl)-*N*-(*p*-tolyl)chroman-6-amine (3bf)**

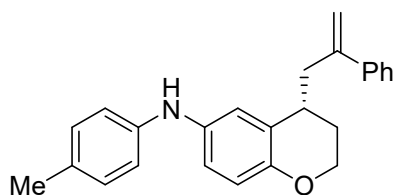

**Colorless oil, 40% yield;**  $[\alpha]_{\text{D}}^{20} = 7.6$  ( $c = 5.1$ ,  $\text{CHCl}_3$ ). ee was determined to be 98% by HPLC analysis with a Chiralcel OD-H column (hexane/2-propanol = 95/5, 1.0 mL/min, 254 nm); tr (major) = 17.573 min;  $^1\text{H NMR}$  (500 MHz,  $\text{CDCl}_3$ )  $\delta$  7.46 - 7.40 (m, 2H), 7.37 - 7.31 (m, 2H), 7.31 - 7.26 (m, 1H), 7.06 - 7.01 (m, 2H), 6.93 - 6.88 (m, 1H), 6.86 - 6.80 (m, 3H), 6.75 - 6.71 (m, 1H), 5.36 (s, 1H), 5.09 (s, 1H), 4.18 - 4.05 (m, 2H), 3.13 (ddd,  $J = 14.3, 4.6, 1.5$  Hz, 1H), 2.84 - 2.73 (m, 1H), 2.63 - 2.51 (m, 1H), 2.28 (s, 3H), 1.94 - 1.83 (m, 1H), 1.82 - 1.74 (m, 1H).  $^{13}\text{C NMR}$  (125 MHz,  $\text{CDCl}_3$ )  $\delta$  149.78, 146.20, 142.66, 140.45, 135.81, 129.80, 129.05, 128.53, 127.67, 126.75, 126.28, 120.71, 120.11, 117.34, 116.25, 115.08, 63.18, 42.76, 31.52, 26.10, 20.56. **HRMS (ESI) m/z: calcd for  $\text{C}_{25}\text{H}_{25}\text{ON}$   $[\text{M}+\text{H}]^+$  356.2014, found 356.2004.**

**5. Crystal data and structure refinement of compound 3ao**

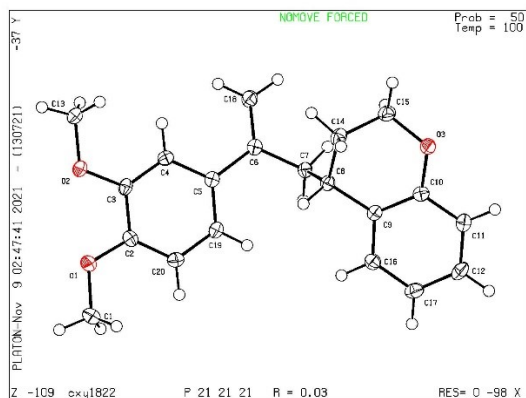

**Table S1 Crystal data and structure refinement for compound 3ao.**

|                                             |                                                               |
|---------------------------------------------|---------------------------------------------------------------|
| Identification code                         | 3ao                                                           |
| Empirical formula                           | C <sub>20</sub> H <sub>22</sub> O <sub>3</sub>                |
| Formula weight                              | 310.37                                                        |
| Temperature/K                               | 100                                                           |
| Crystal system                              | orthorhombic                                                  |
| Space group                                 | P2 <sub>1</sub> 2 <sub>1</sub> 2 <sub>1</sub>                 |
| a/Å                                         | 6.4702(3)                                                     |
| b/Å                                         | 9.9613(4)                                                     |
| c/Å                                         | 25.6312(11)                                                   |
| α/°                                         | 90                                                            |
| β/°                                         | 90                                                            |
| γ/°                                         | 90                                                            |
| Volume/Å <sup>3</sup>                       | 1651.97(12)                                                   |
| Z                                           | 4                                                             |
| ρ <sub>calc</sub> /cm <sup>3</sup>          | 1.248                                                         |
| μ/mm <sup>-1</sup>                          | 0.660                                                         |
| F(000)                                      | 664.0                                                         |
| Crystal size/mm <sup>3</sup>                | 0.41 × 0.35 × 0.33                                            |
| Radiation                                   | CuKα (λ = 1.54178)                                            |
| 2θ range for data collection/°              | 6.898 to 137.206                                              |
| Index ranges                                | -7 ≤ h ≤ 7, -10 ≤ k ≤ 12, -30 ≤ l ≤ 30                        |
| Reflections collected                       | 19161                                                         |
| Independent reflections                     | 3041 [R <sub>int</sub> = 0.0370, R <sub>sigma</sub> = 0.0217] |
| Data/restraints/parameters                  | 3041/0/211                                                    |
| Goodness-of-fit on F <sup>2</sup>           | 1.034                                                         |
| Final R indexes [I ≥ 2σ (I)]                | R <sub>1</sub> = 0.0252, wR <sub>2</sub> = 0.0639             |
| Final R indexes [all data]                  | R <sub>1</sub> = 0.0261, wR <sub>2</sub> = 0.0645             |
| Largest diff. peak/hole / e Å <sup>-3</sup> | 0.16/-0.14                                                    |
| Flack parameter                             | -0.12(6)                                                      |

**Table S2 Fractional Atomic Coordinates ( $\times 10^4$ ) and Equivalent Isotropic Displacement Parameters ( $\text{\AA}^2 \times 10^3$ ) for compound 3ao.  $U_{eq}$  is defined as 1/3 of the trace of the orthogonalised  $U_{IJ}$  tensor.**

| Atom | x           | y           | z          | U(eq)   |
|------|-------------|-------------|------------|---------|
| O1   | -7735.9(18) | -5095.8(12) | -4714.8(4) | 24.8(3) |
| O2   | -4537.1(18) | -3596.8(11) | -4555.0(4) | 22.6(3) |
| O3   | -8212.8(18) | -3287.8(11) | -981.5(4)  | 21.9(3) |
| C1   | -9477(3)    | -5936.4(19) | -4821.5(7) | 30.9(4) |
| C2   | -7077(2)    | -5033.1(16) | -4209.2(5) | 18.4(3) |
| C3   | -5314(2)    | -4222.3(15) | -4122.6(6) | 17.5(3) |
| C4   | -4530(2)    | -4083.0(14) | -3625.7(6) | 17.2(3) |
| C5   | -5452(2)    | -4725.8(14) | -3194.0(5) | 15.7(3) |
| C6   | -4565(2)    | -4549.1(14) | -2661.5(5) | 16.3(3) |
| C7   | -5761(2)    | -5080.5(15) | -2198.7(5) | 16.4(3) |
| C8   | -7698(2)    | -4232.1(14) | -2064.8(6) | 16.5(3) |
| C9   | -9008(2)    | -4928.4(15) | -1656.8(6) | 16.0(3) |
| C10  | -9215(2)    | -4421.7(15) | -1151.1(6) | 17.6(3) |
| C11  | -10515(3)   | -5041.7(17) | -788.5(6)  | 21.8(3) |
| C12  | -11603(3)   | -6180.3(17) | -928.3(6)  | 24.0(3) |
| C13  | -2841(3)    | -2693.4(17) | -4472.1(6) | 26.7(4) |
| C14  | -7142(3)    | -2819.3(15) | -1875.3(6) | 21.1(3) |
| C15  | -6523(3)    | -2853.0(16) | -1304.6(6) | 22.6(3) |
| C16  | -10121(2)   | -6087.9(15) | -1783.0(6) | 19.2(3) |
| C17  | -11399(3)   | -6716.9(17) | -1427.5(6) | 22.9(3) |
| C18  | -2771(3)    | -3928.7(16) | -2579.4(6) | 20.9(3) |
| C19  | -7185(2)    | -5511.1(14) | -3287.5(6) | 18.0(3) |
| C20  | -7993(3)    | -5668.7(15) | -3790.7(6) | 19.8(3) |

**Table S3 Anisotropic Displacement Parameters ( $\text{\AA}^2 \times 10^3$ ) for compound 3ao. The Anisotropic displacement factor exponent takes the form: -  $2\pi^2[h^2a^{*2}U_{11}+2hka^*b^*U_{12}+\dots]$ .**

| Atom | $U_{11}$ | $U_{22}$ | $U_{33}$ | $U_{23}$ | $U_{13}$ | $U_{12}$ |
|------|----------|----------|----------|----------|----------|----------|
| O1   | 27.8(6)  | 30.0(6)  | 16.7(5)  | 1.5(4)   | -3.8(4)  | -8.6(5)  |
| O2   | 26.4(6)  | 25.2(6)  | 16.2(5)  | 3.9(4)   | 0.8(4)   | -8.3(5)  |
| O3   | 26.3(6)  | 20.4(5)  | 18.9(5)  | -3.0(4)  | 3.8(4)   | -5.4(5)  |
| C1   | 30.8(9)  | 39.9(10) | 21.8(8)  | -2.8(7)  | -5.0(7)  | -12.7(8) |
| C2   | 20.0(7)  | 18.6(7)  | 16.5(7)  | -0.6(5)  | -1.7(6)  | 1.7(6)   |
| C3   | 20.0(7)  | 15.7(7)  | 16.7(7)  | 2.7(5)   | 3.1(6)   | 1.2(6)   |
| C4   | 16.7(7)  | 14.4(7)  | 20.4(7)  | 0.4(6)   | 0.6(6)   | 0.3(6)   |

|     |         |         |         |         |         |          |
|-----|---------|---------|---------|---------|---------|----------|
| C5  | 16.1(7) | 13.5(6) | 17.5(7) | 0.7(5)  | 0.8(5)  | 3.4(6)   |
| C6  | 17.9(7) | 13.0(7) | 18.0(7) | 1.8(5)  | 0.5(6)  | 3.7(6)   |
| C7  | 17.8(7) | 15.7(7) | 15.8(7) | 1.4(5)  | -0.4(5) | 1.3(6)   |
| C8  | 17.1(7) | 16.1(7) | 16.2(7) | 2.1(5)  | 0.0(6)  | 0.9(6)   |
| C9  | 14.6(7) | 16.2(7) | 17.4(7) | 3.1(6)  | -0.1(5) | 2.4(6)   |
| C10 | 17.5(7) | 15.3(7) | 20.0(7) | 0.9(6)  | -0.6(6) | 0.6(6)   |
| C11 | 22.9(7) | 24.3(8) | 18.3(7) | 2.5(6)  | 2.5(6)  | 1.2(7)   |
| C12 | 21.2(8) | 25.6(8) | 25.2(8) | 8.4(6)  | 4.3(7)  | -2.6(7)  |
| C13 | 30.6(9) | 29.2(8) | 20.1(8) | 3.2(6)  | 2.6(7)  | -12.6(7) |
| C14 | 24.6(8) | 15.8(7) | 22.8(8) | 2.0(6)  | 5.1(6)  | 0.2(6)   |
| C15 | 23.7(8) | 19.1(8) | 25.0(8) | -3.8(6) | 4.0(6)  | -5.3(7)  |
| C16 | 19.3(7) | 19.2(7) | 19.1(7) | 0.2(6)  | -1.2(6) | 0.7(6)   |
| C17 | 20.6(7) | 20.8(8) | 27.4(8) | 4.1(6)  | -2.3(6) | -4.2(6)  |
| C18 | 18.3(7) | 25.7(8) | 18.8(7) | 4.0(6)  | -1.7(6) | -0.1(6)  |
| C19 | 18.6(7) | 17.8(7) | 17.6(7) | 2.6(5)  | 2.4(6)  | 0.5(6)   |
| C20 | 19.4(7) | 17.9(7) | 22.2(7) | -0.4(6) | -0.1(6) | -2.3(6)  |

**Table S4 Bond Lengths for compound 3ao.**

| Atom | Atom | Length/Å   |  | Atom | Atom | Length/Å |
|------|------|------------|--|------|------|----------|
| O1   | C1   | 1.430(2)   |  | C6   | C18  | 1.332(2) |
| O1   | C2   | 1.3655(17) |  | C7   | C8   | 1.550(2) |
| O2   | C3   | 1.3672(18) |  | C8   | C9   | 1.514(2) |
| O2   | C13  | 1.435(2)   |  | C8   | C14  | 1.532(2) |
| O3   | C10  | 1.3731(19) |  | C9   | C10  | 1.397(2) |
| O3   | C15  | 1.4384(19) |  | C9   | C16  | 1.399(2) |
| C2   | C3   | 1.415(2)   |  | C10  | C11  | 1.397(2) |
| C2   | C20  | 1.379(2)   |  | C11  | C12  | 1.382(2) |
| C3   | C4   | 1.378(2)   |  | C12  | C17  | 1.393(2) |
| C4   | C5   | 1.411(2)   |  | C14  | C15  | 1.517(2) |
| C5   | C6   | 1.491(2)   |  | C16  | C17  | 1.381(2) |
| C5   | C19  | 1.388(2)   |  | C19  | C20  | 1.401(2) |
| C6   | C7   | 1.5118(19) |  |      |      |          |

**Table S5 Bond Angles for compound 3ao.**

| Atom | Atom | Atom | Angle/°    |  | Atom | Atom | Atom | Angle/°    |
|------|------|------|------------|--|------|------|------|------------|
| C2   | O1   | C1   | 117.00(12) |  | C9   | C8   | C7   | 110.84(11) |
| C3   | O2   | C13  | 116.55(12) |  | C9   | C8   | C14  | 109.47(12) |
| C10  | O3   | C15  | 115.12(12) |  | C14  | C8   | C7   | 112.41(13) |
| O1   | C2   | C3   | 115.24(13) |  | C10  | C9   | C8   | 121.93(13) |
| O1   | C2   | C20  | 125.66(14) |  | C10  | C9   | C16  | 117.60(13) |

|     |    |    |            |  |     |     |     |            |
|-----|----|----|------------|--|-----|-----|-----|------------|
| C20 | C2 | C3 | 119.09(13) |  | C16 | C9  | C8  | 120.44(13) |
| O2  | C3 | C2 | 115.43(13) |  | O3  | C10 | C9  | 123.06(13) |
| O2  | C3 | C4 | 124.60(14) |  | O3  | C10 | C11 | 115.93(13) |
| C4  | C3 | C2 | 119.95(13) |  | C11 | C10 | C9  | 121.00(14) |
| C3  | C4 | C5 | 121.57(14) |  | C12 | C11 | C10 | 119.79(14) |
| C4  | C5 | C6 | 120.12(13) |  | C11 | C12 | C17 | 120.32(14) |
| C19 | C5 | C4 | 117.52(13) |  | C15 | C14 | C8  | 110.34(12) |
| C19 | C5 | C6 | 122.36(13) |  | O3  | C15 | C14 | 111.18(13) |
| C5  | C6 | C7 | 118.69(13) |  | C17 | C16 | C9  | 122.03(14) |
| C18 | C6 | C5 | 122.32(14) |  | C16 | C17 | C12 | 119.26(15) |
| C18 | C6 | C7 | 118.98(13) |  | C5  | C19 | C20 | 121.58(14) |
| C6  | C7 | C8 | 113.36(12) |  | C2  | C20 | C19 | 120.29(14) |

**Table S6 Torsion Angles for compound 3ao.**

| A  | B   | C   | D   | Angle/°     |  | A   | B   | C   | D   | Angle/°     |
|----|-----|-----|-----|-------------|--|-----|-----|-----|-----|-------------|
| O1 | C2  | C3  | O2  | 1.1(2)      |  | C8  | C9  | C10 | C11 | 176.70(14)  |
| O1 | C2  | C3  | C4  | 179.58(13)  |  | C8  | C9  | C16 | C17 | -177.23(14) |
| O1 | C2  | C20 | C19 | -179.12(15) |  | C8  | C14 | C15 | O3  | -62.91(17)  |
| O2 | C3  | C4  | C5  | 177.93(13)  |  | C9  | C8  | C14 | C15 | 43.23(17)   |
| O3 | C10 | C11 | C12 | 179.27(14)  |  | C9  | C10 | C11 | C12 | 0.6(2)      |
| C1 | O1  | C2  | C3  | 178.20(14)  |  | C9  | C16 | C17 | C12 | 0.4(2)      |
| C1 | O1  | C2  | C20 | -2.6(2)     |  | C10 | O3  | C15 | C14 | 47.98(18)   |
| C2 | C3  | C4  | C5  | -0.4(2)     |  | C10 | C9  | C16 | C17 | 0.5(2)      |
| C3 | C2  | C20 | C19 | 0.0(2)      |  | C10 | C11 | C12 | C17 | 0.4(2)      |
| C3 | C4  | C5  | C6  | -179.81(13) |  | C11 | C12 | C17 | C16 | -0.9(2)     |
| C3 | C4  | C5  | C19 | 0.1(2)      |  | C13 | O2  | C3  | C2  | 175.68(14)  |

**Table S7 Hydrogen Atom Coordinates ( $\text{\AA} \times 10^4$ ) and Isotropic Displacement Parameters ( $\text{\AA}^2 \times 10^3$ ) for compound 3ao.**

| Atom | x         | y        | z        | U(eq) |
|------|-----------|----------|----------|-------|
| H1A  | -10672.52 | -5619.65 | -4621.61 | 46    |
| H1B  | -9154.99  | -6862.27 | -4720.93 | 46    |
| H1C  | -9796.46  | -5903.37 | -5195    | 46    |
| H4   | -3340.13  | -3541.24 | -3572.52 | 21    |
| H7A  | -4837.17  | -5102.65 | -1890.92 | 20    |
| H7B  | -6197.51  | -6013.74 | -2272.94 | 20    |
| H8   | -8545.5   | -4140.78 | -2389.12 | 20    |
| H11  | -10650.21 | -4681.81 | -446.93  | 26    |
| H12  | -12493.68 | -6599.08 | -682.68  | 29    |
| H13A | -1638.44  | -3198.51 | -4347.78 | 40    |

|      |           |          |          |    |
|------|-----------|----------|----------|----|
| H13B | -3230.76  | -2020.59 | -4211.04 | 40 |
| H13C | -2496.28  | -2243.92 | -4800.89 | 40 |
| H14A | -5984.95  | -2461.38 | -2086.3  | 25 |
| H14B | -8344.57  | -2216.3  | -1921.04 | 25 |
| H15A | -5339.62  | -3471.91 | -1258.86 | 27 |
| H15B | -6076.84  | -1945.66 | -1194.31 | 27 |
| H16  | -9994.53  | -6453.61 | -2123.81 | 23 |
| H17  | -12130.88 | -7506.84 | -1522.31 | 28 |
| H18A | -2008.62  | -3580.33 | -2865.72 | 25 |
| H18B | -2253.5   | -3834.62 | -2234.42 | 25 |
| H19  | -7838.56  | -5952.2  | -3003.32 | 22 |
| H20  | -9176.87  | -6215.78 | -3844.03 | 24 |

### Experimental

Single crystals of C<sub>20</sub>H<sub>22</sub>O<sub>3</sub> [**compound 3ao**] were [1]. A suitable crystal was selected and [2] on a **Bruker CMOS area detector** diffractometer. The crystal was kept at 100 K during data collection. Using Olex2 [1], the structure was solved with the SHELXT [2] structure solution program using Intrinsic Phasing and refined with the SHELXL [3] refinement package using Least Squares minimisation.

### Crystal structure determination of [**compound 3ao**]

**Crystal Data** for C<sub>20</sub>H<sub>22</sub>O<sub>3</sub> ( $M=310.37$  g/mol): orthorhombic, space group P2<sub>1</sub>2<sub>1</sub>2<sub>1</sub> (no. 19),  $a = 6.4702(3)$  Å,  $b = 9.9613(4)$  Å,  $c = 25.6312(11)$  Å,  $V = 1651.97(12)$  Å<sup>3</sup>,  $Z = 4$ ,  $T = 100$  K,  $\mu(\text{CuK}\alpha) = 0.660$  mm<sup>-1</sup>,  $D_{\text{calc}} = 1.248$  g/cm<sup>3</sup>, 19161 reflections measured ( $6.898^\circ \leq 2\theta \leq 137.206^\circ$ ), 3041 unique ( $R_{\text{int}} = 0.0370$ ,  $R_{\text{sigma}} = 0.0217$ ) which were used in all calculations. The final  $R_1$  was 0.0252 ( $I > 2\sigma(I)$ ) and  $wR_2$  was 0.0645 (all data).



## 6. Copies of $^1\text{H}$ NMR, $^{13}\text{C}$ NMR, $^{19}\text{F}$ NMR and HPLC spectra of the products Compound 3aa

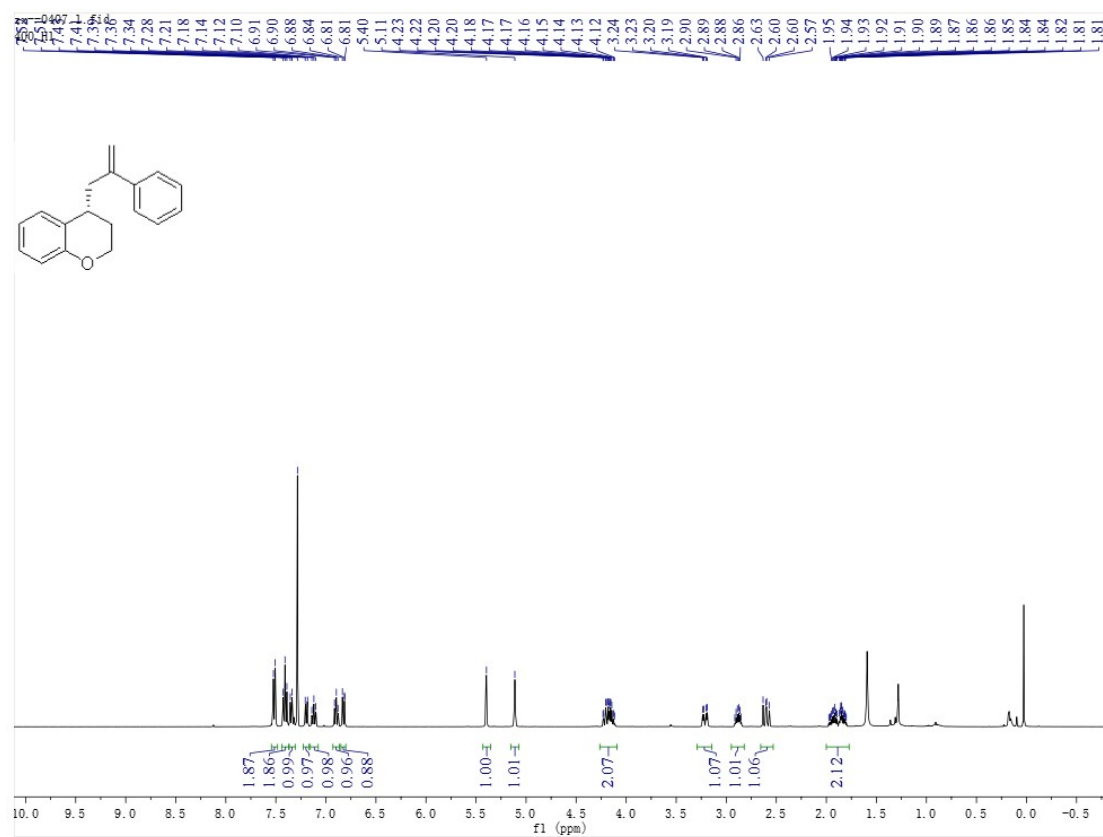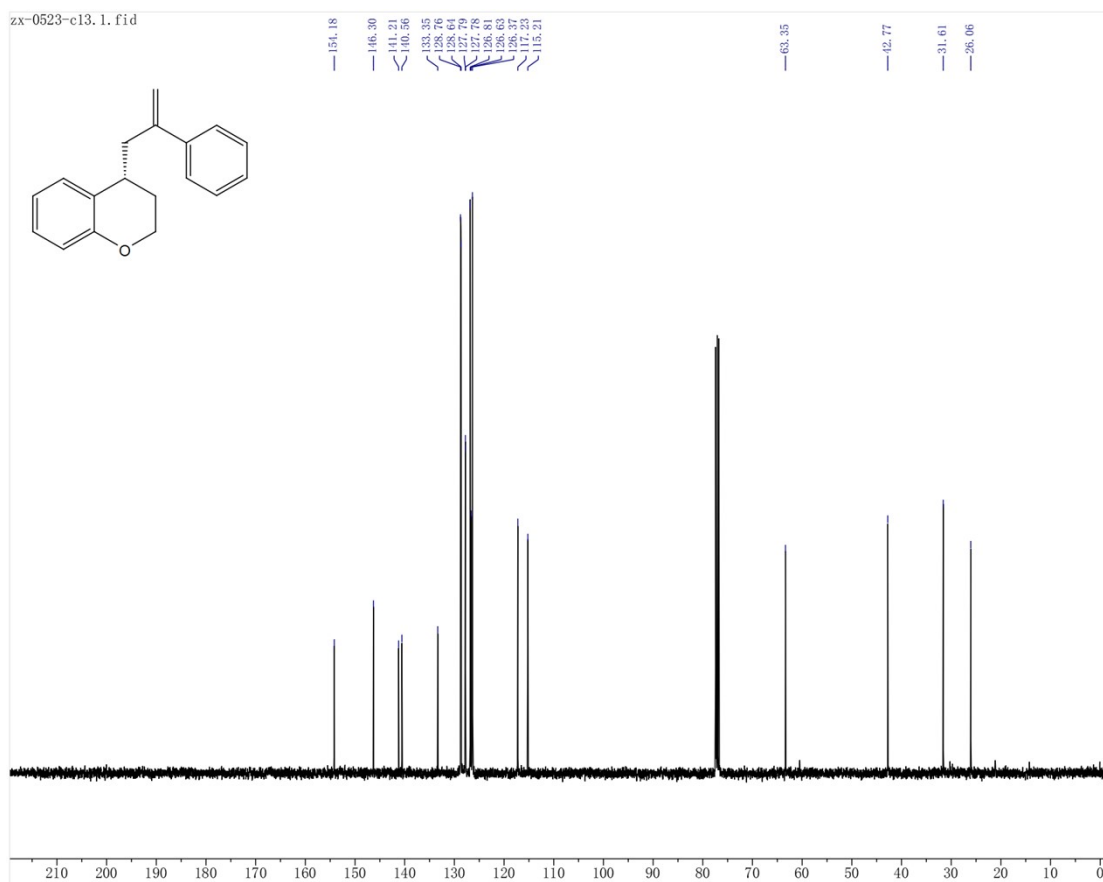

# Compound 3ab

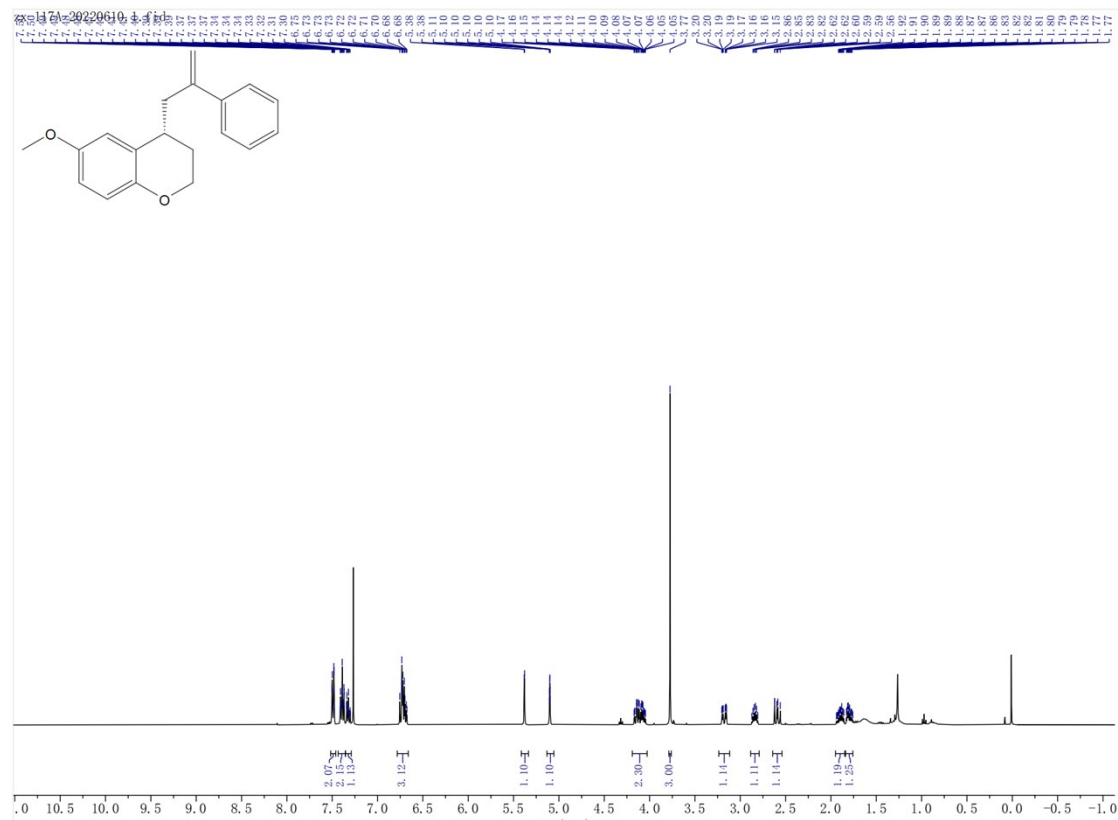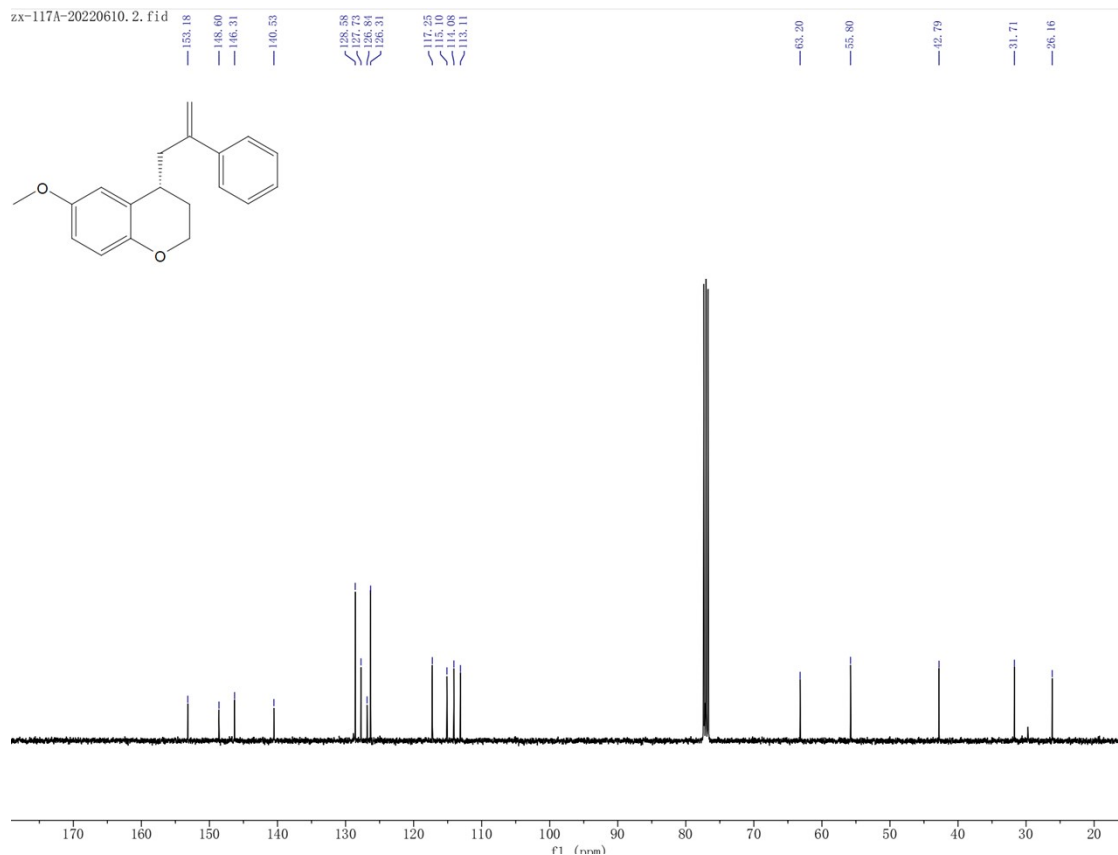

# Compound 3ac

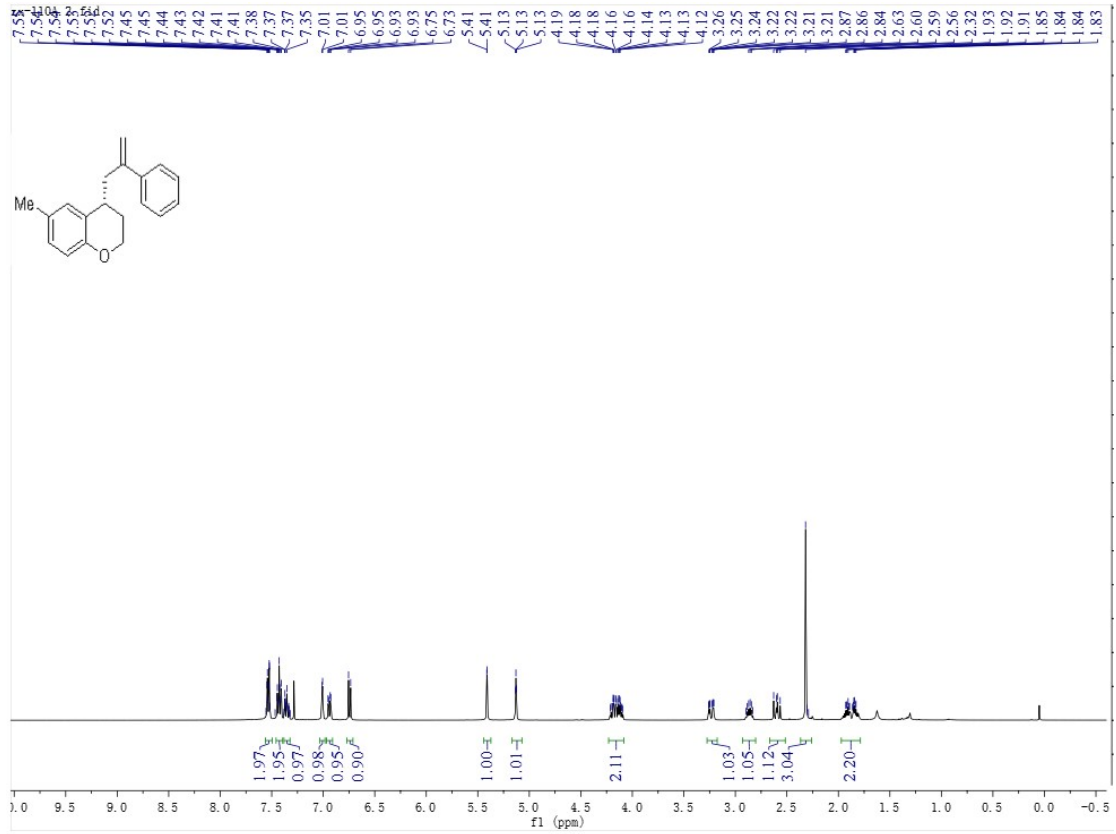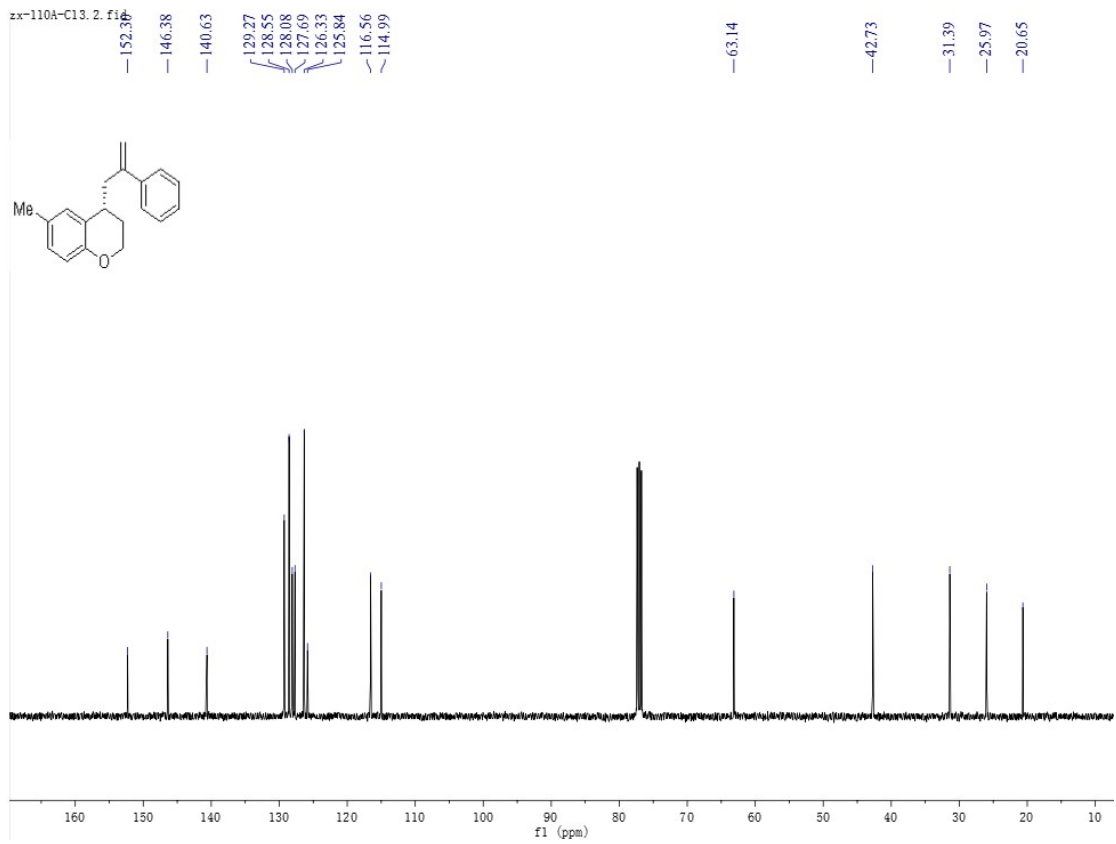

**Compound 3ad**

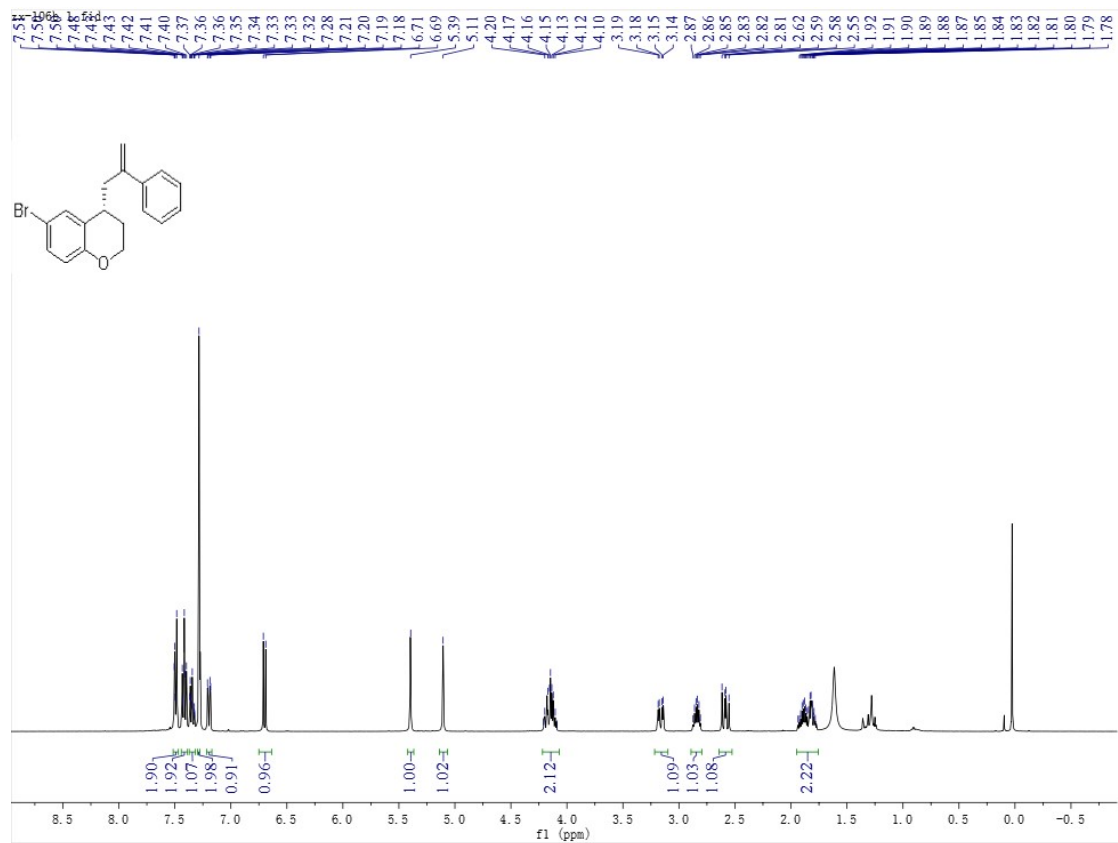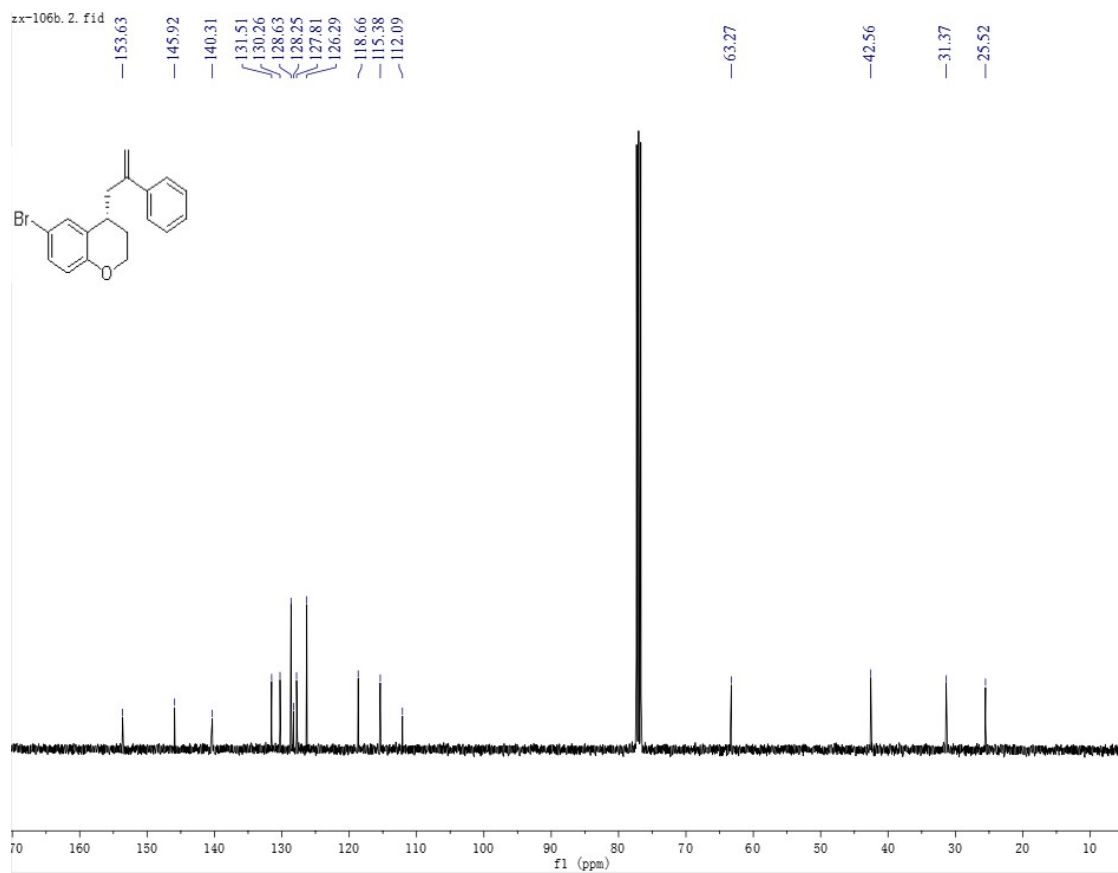

**Compound 3ae**

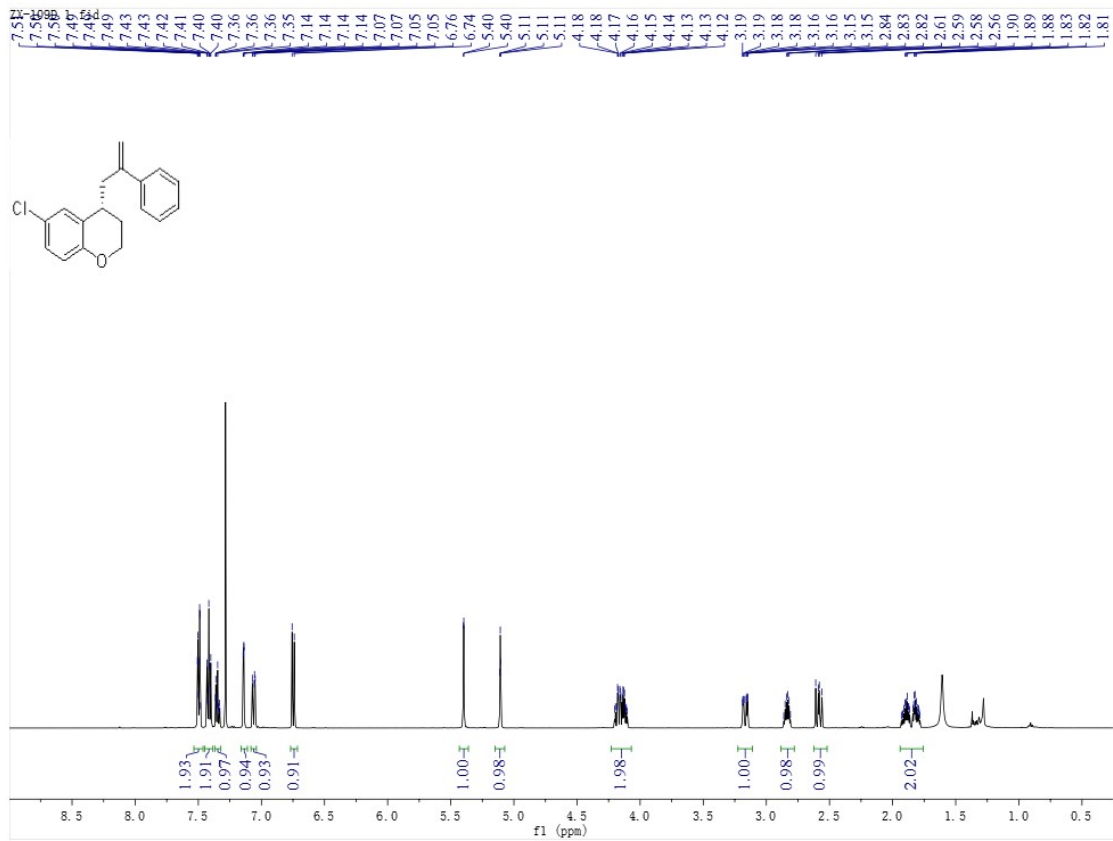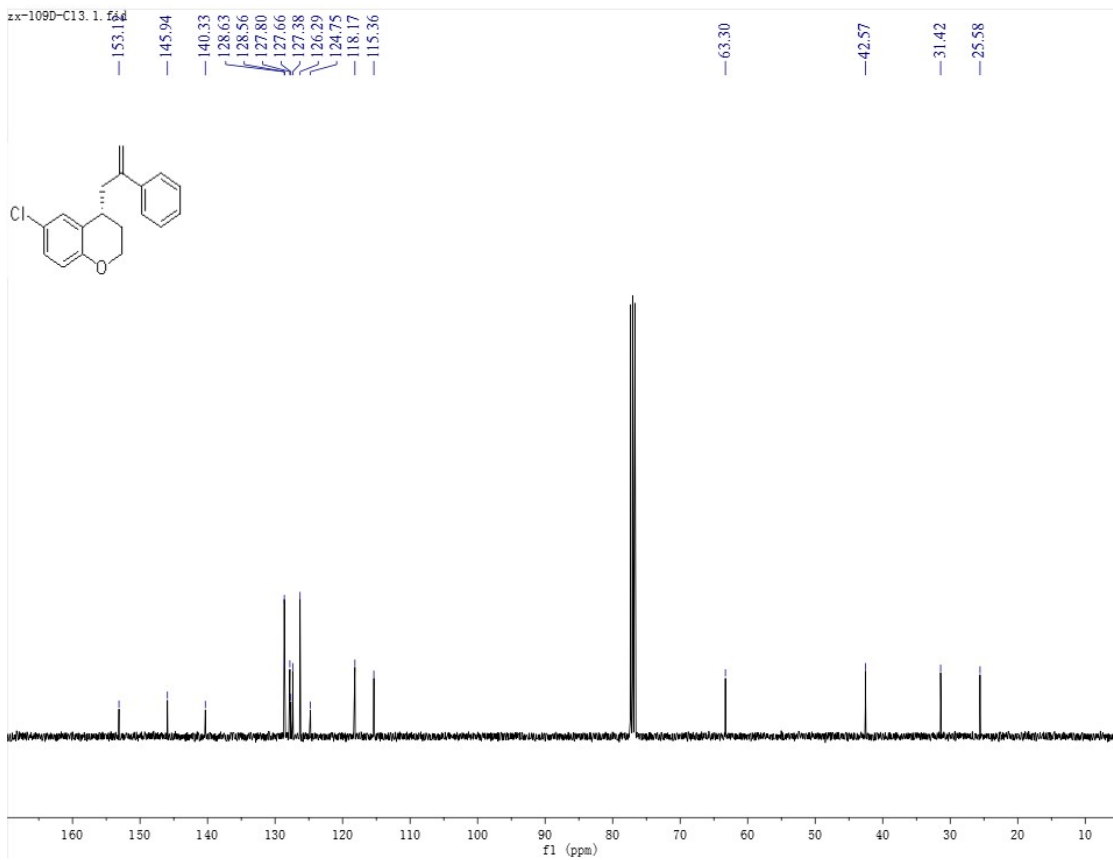

**Compound 3af**

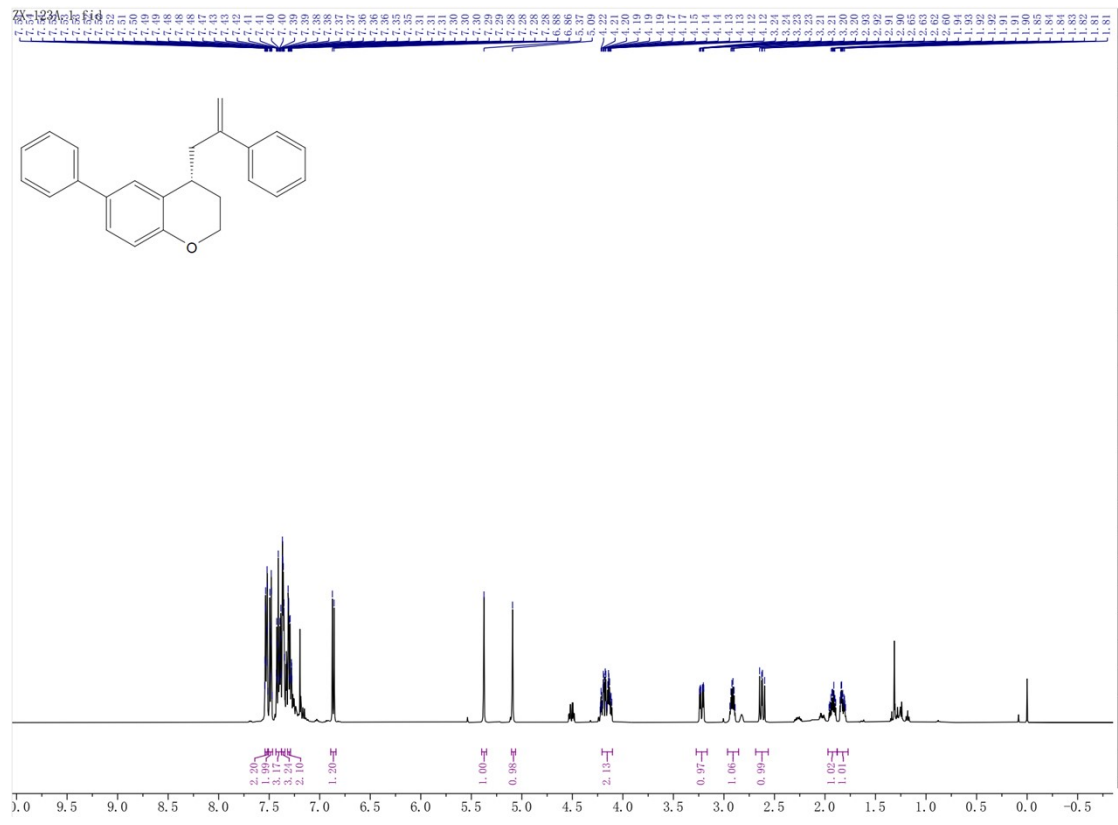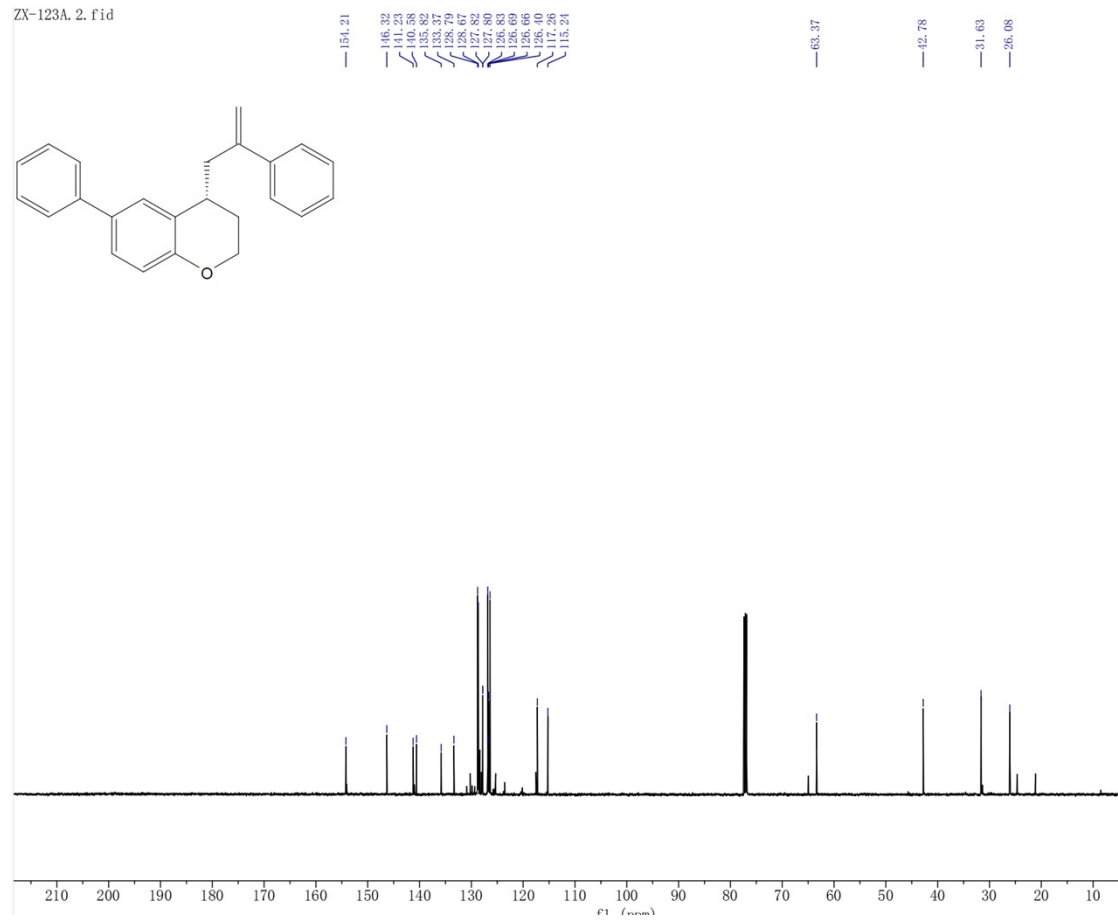

**Compound 3ag**

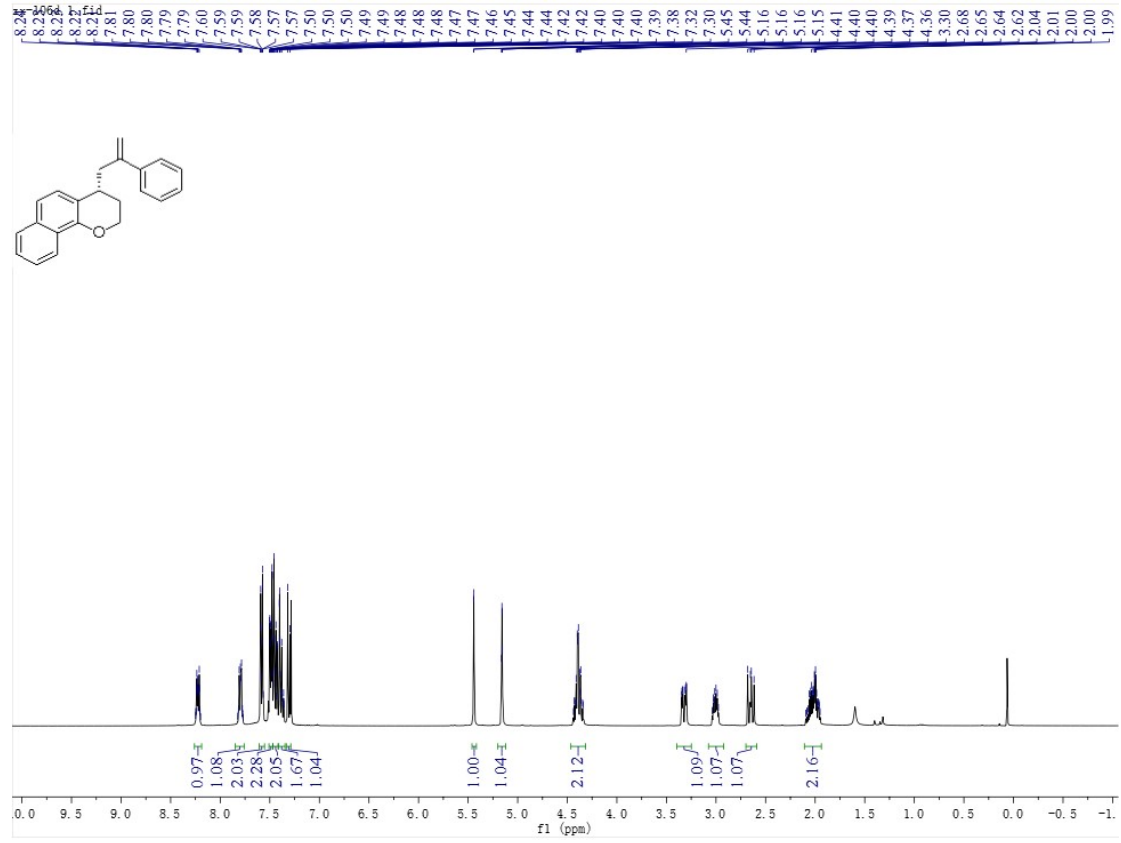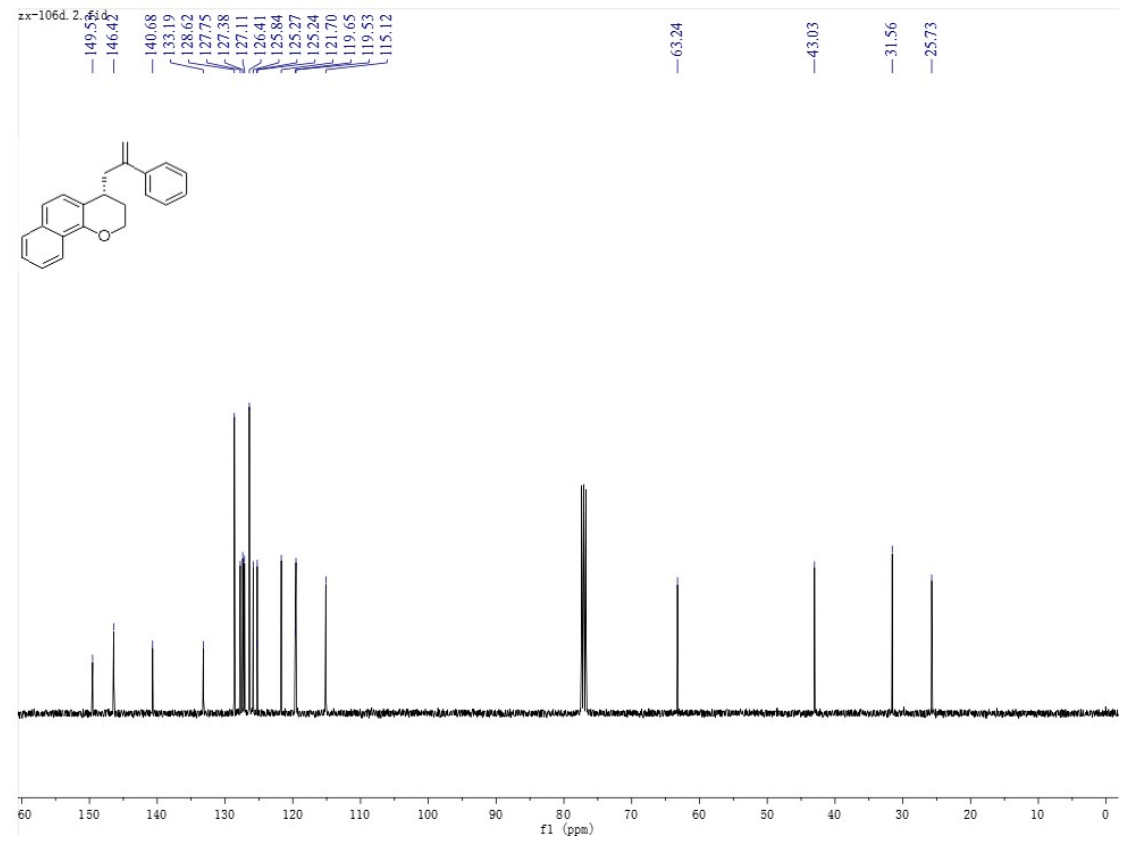

**Compound 3ah**

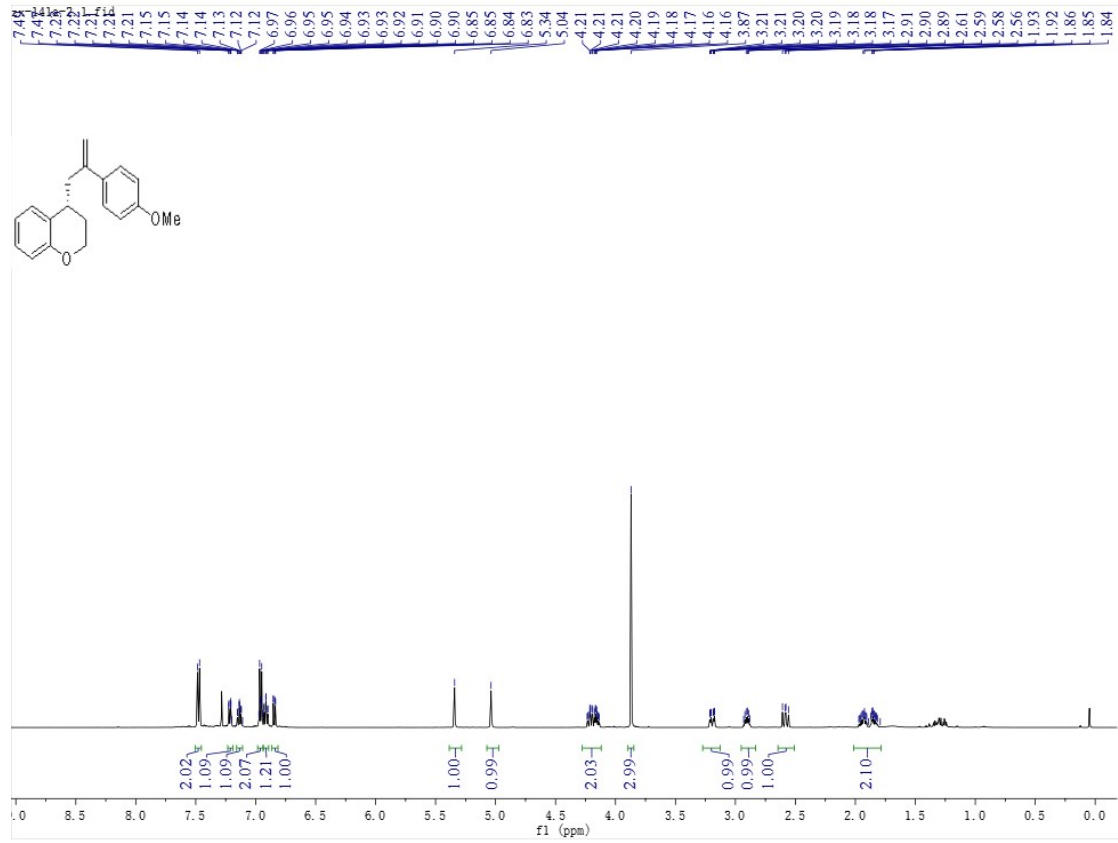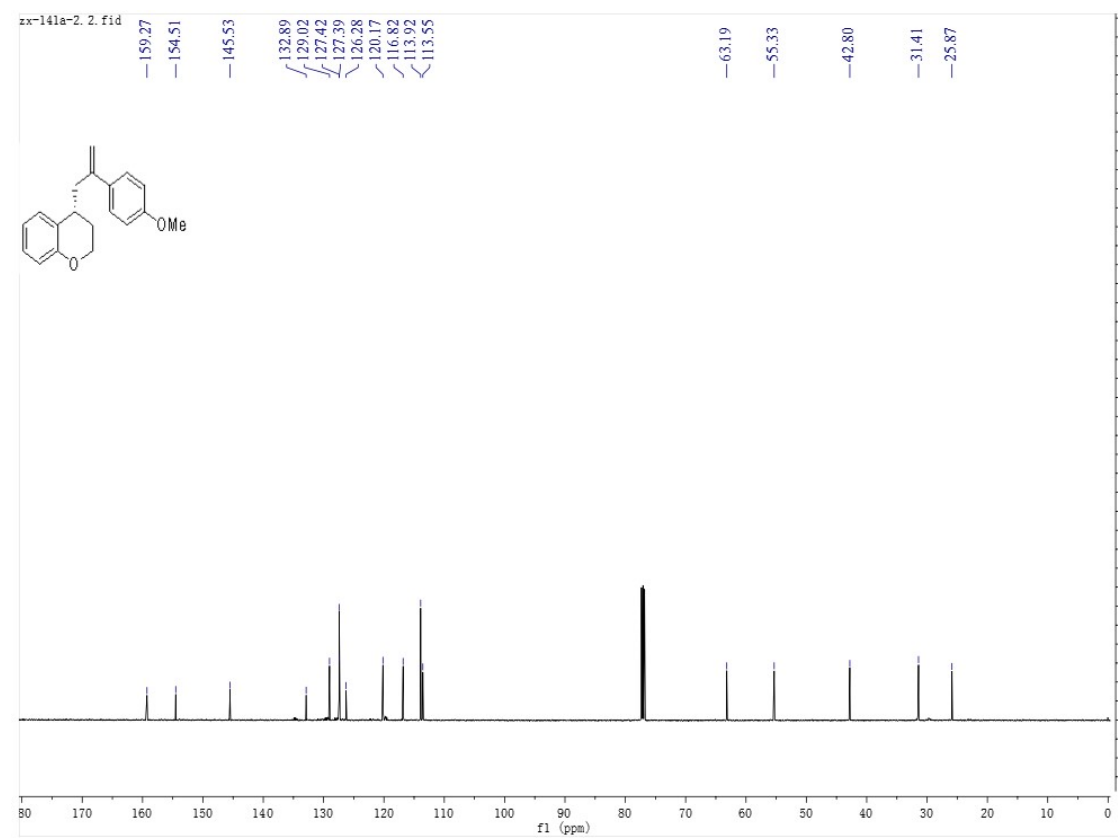

**Compound 3ai**



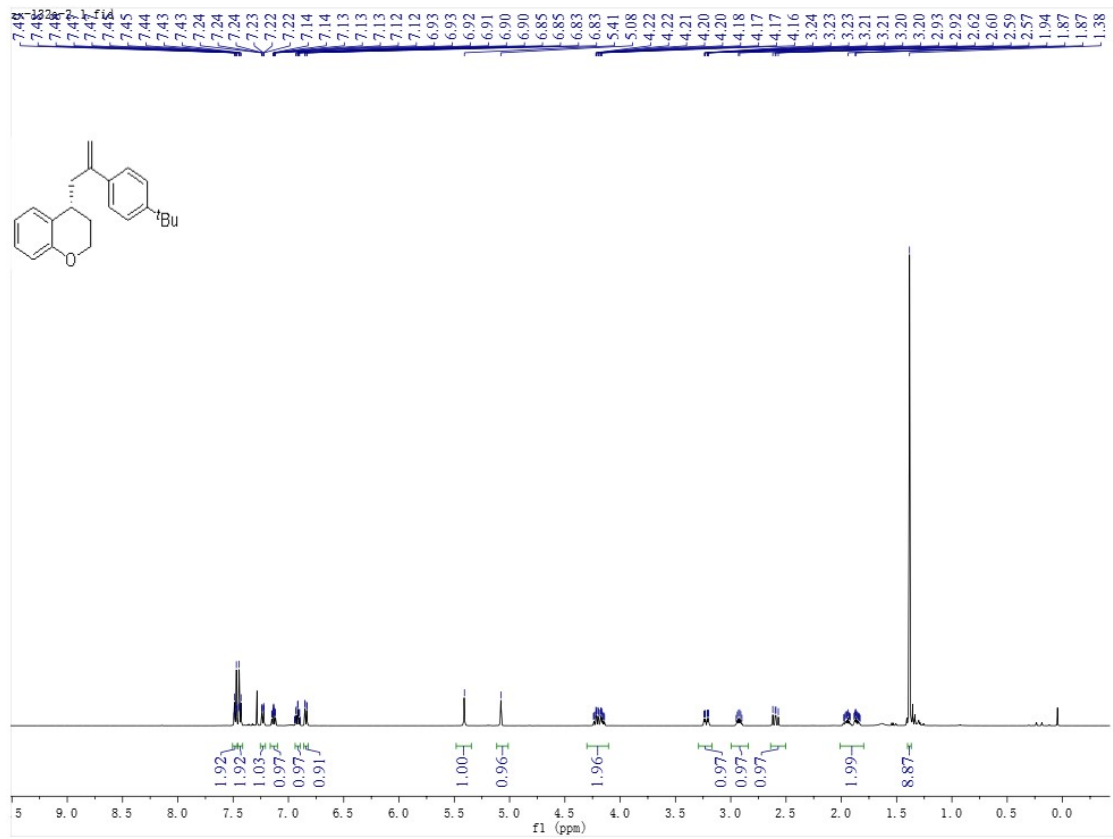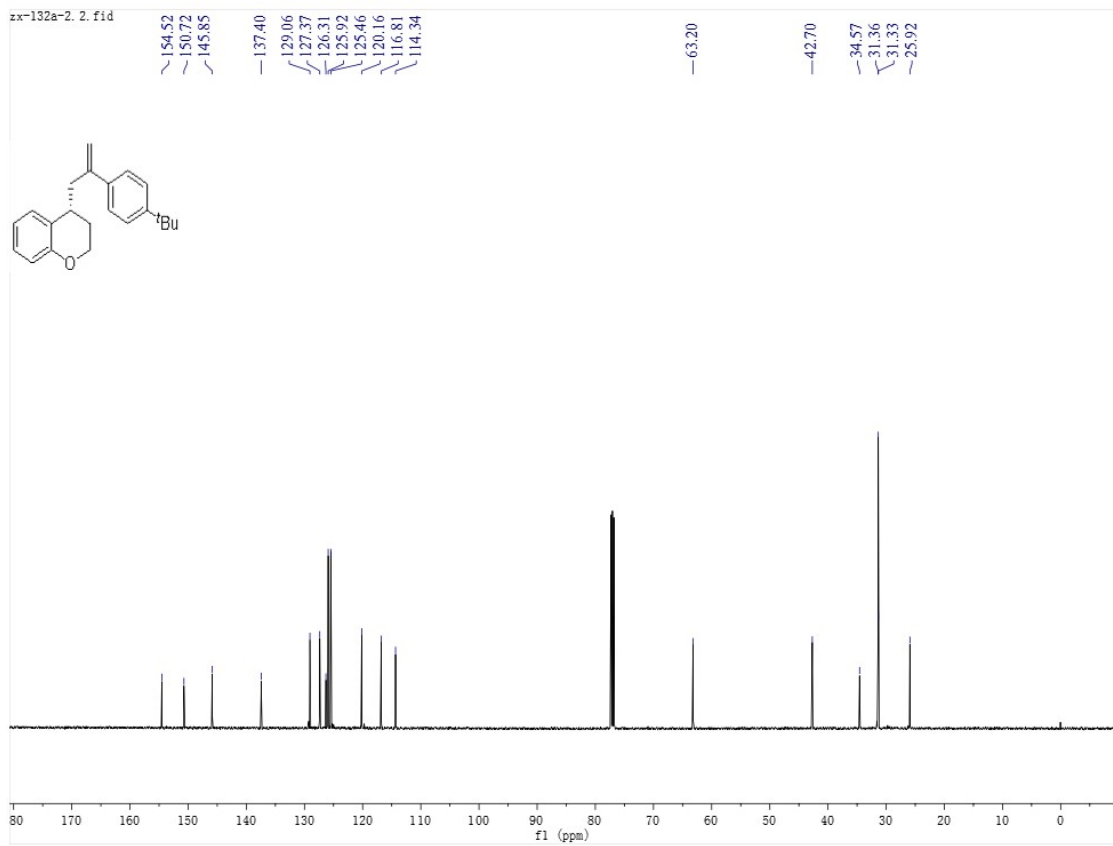

**Compound 3aj**

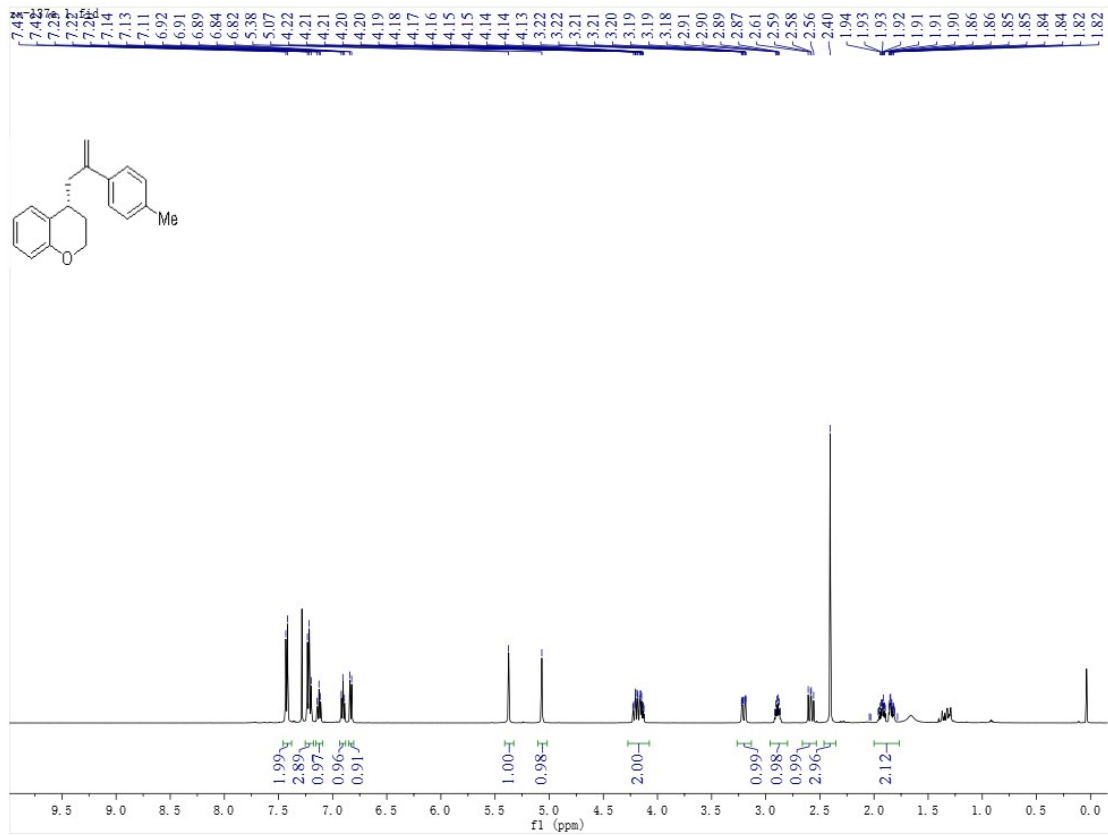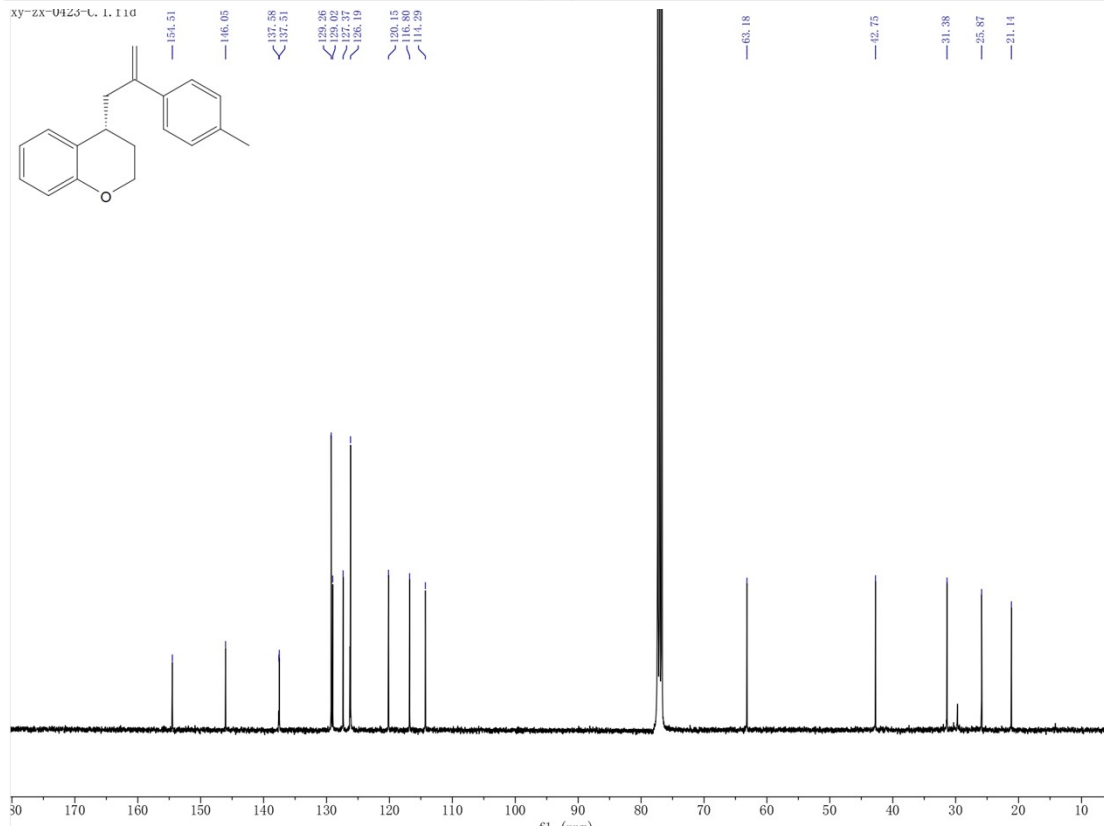

**Compound 3ak**

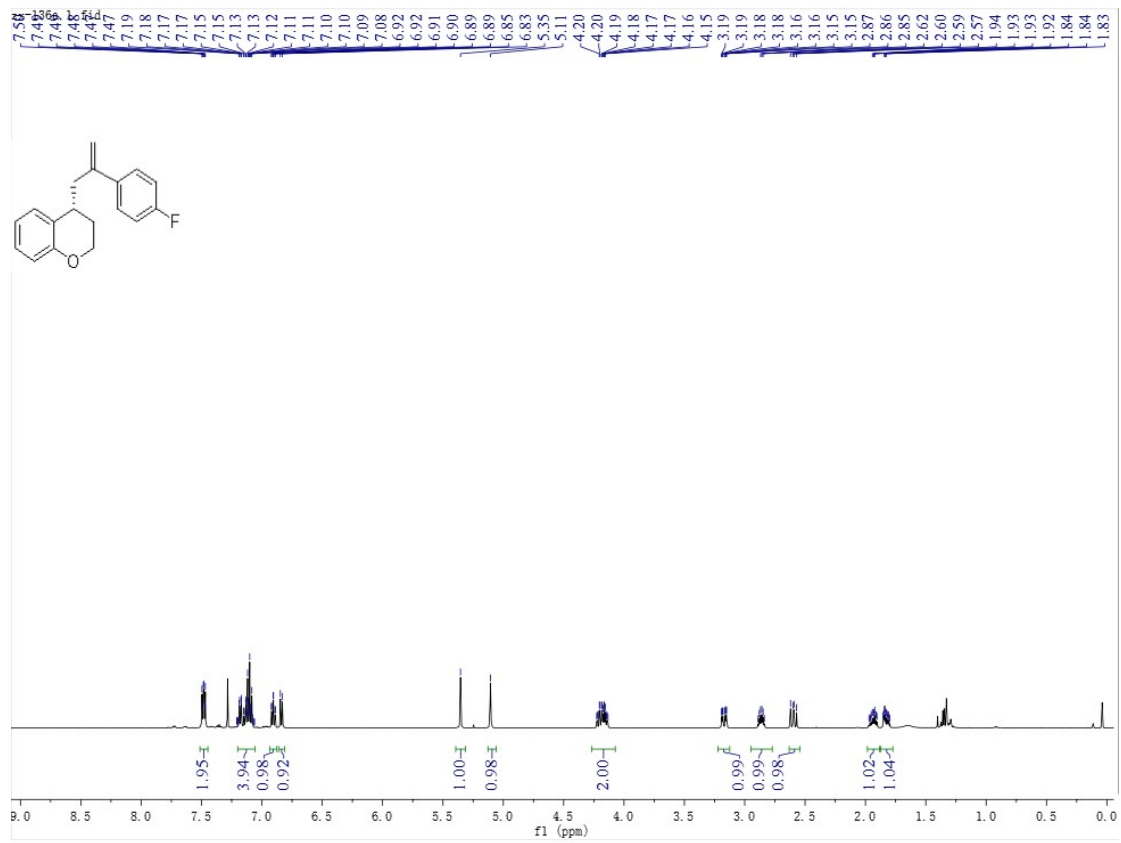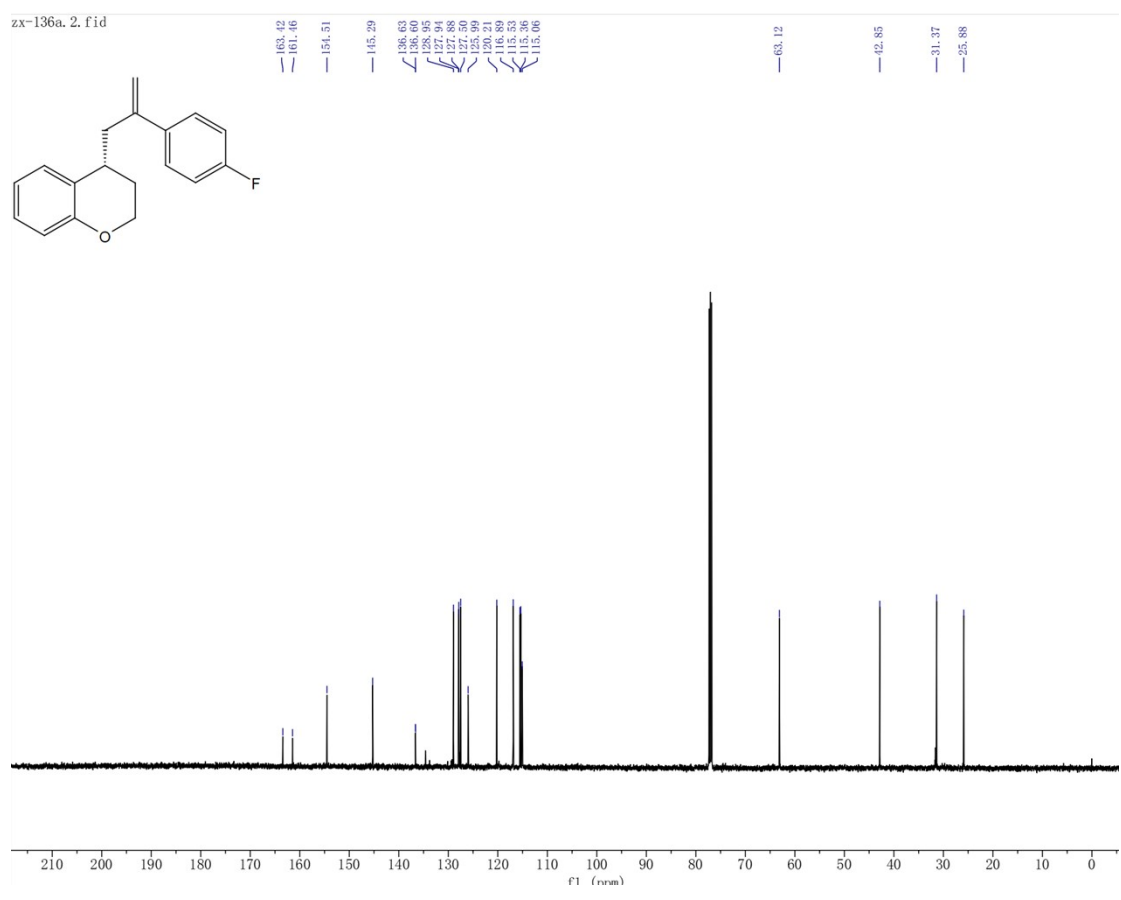

zx-136a-f. 1. fid

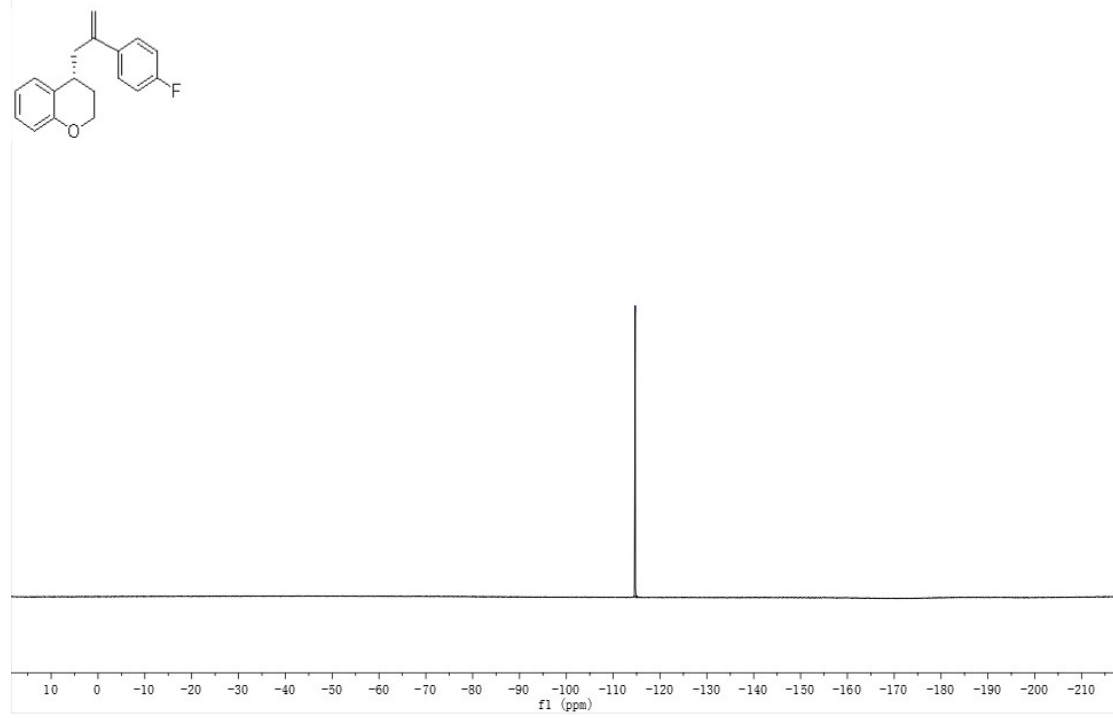

### Compound 3al

7.45  
7.45  
7.46  
7.46  
7.47  
7.39  
7.38  
7.37  
7.17  
7.17  
7.16  
7.16  
7.15  
7.14  
7.13  
7.12  
7.11  
6.92  
6.91  
6.90  
6.90  
6.89  
6.88  
6.84  
6.84  
6.82  
6.82  
5.39  
5.39  
5.13  
5.13  
4.20  
4.19  
4.19  
4.18  
4.17  
4.17  
4.16  
4.16  
4.15  
4.15  
3.17  
3.17  
3.16  
3.15  
3.15  
3.14  
3.14  
2.86  
2.85  
2.84  
2.62  
2.59  
2.59  
2.57  
1.91  
1.83  
1.82

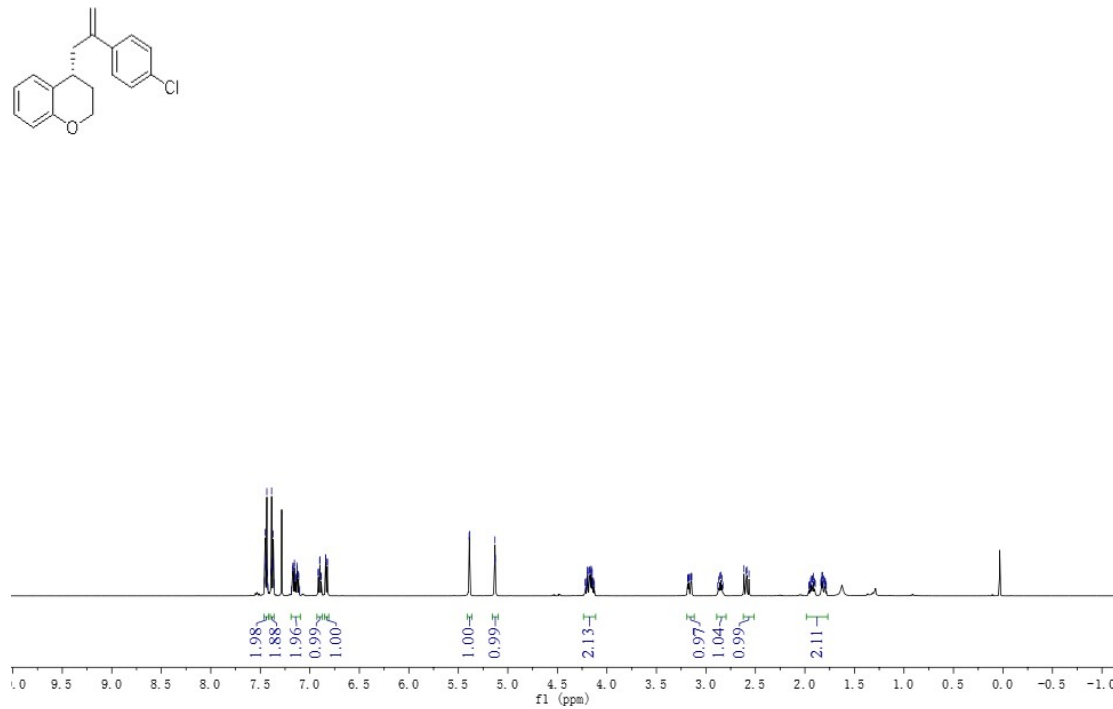

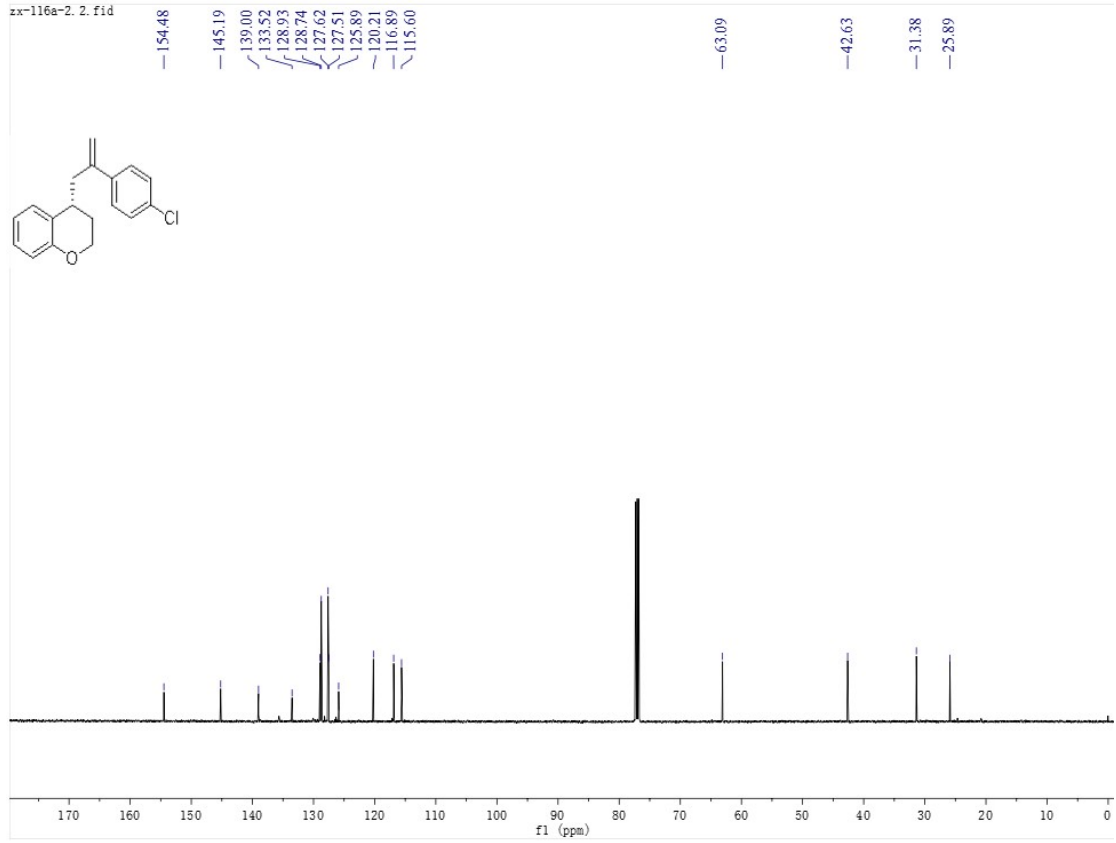

### Compound 3am

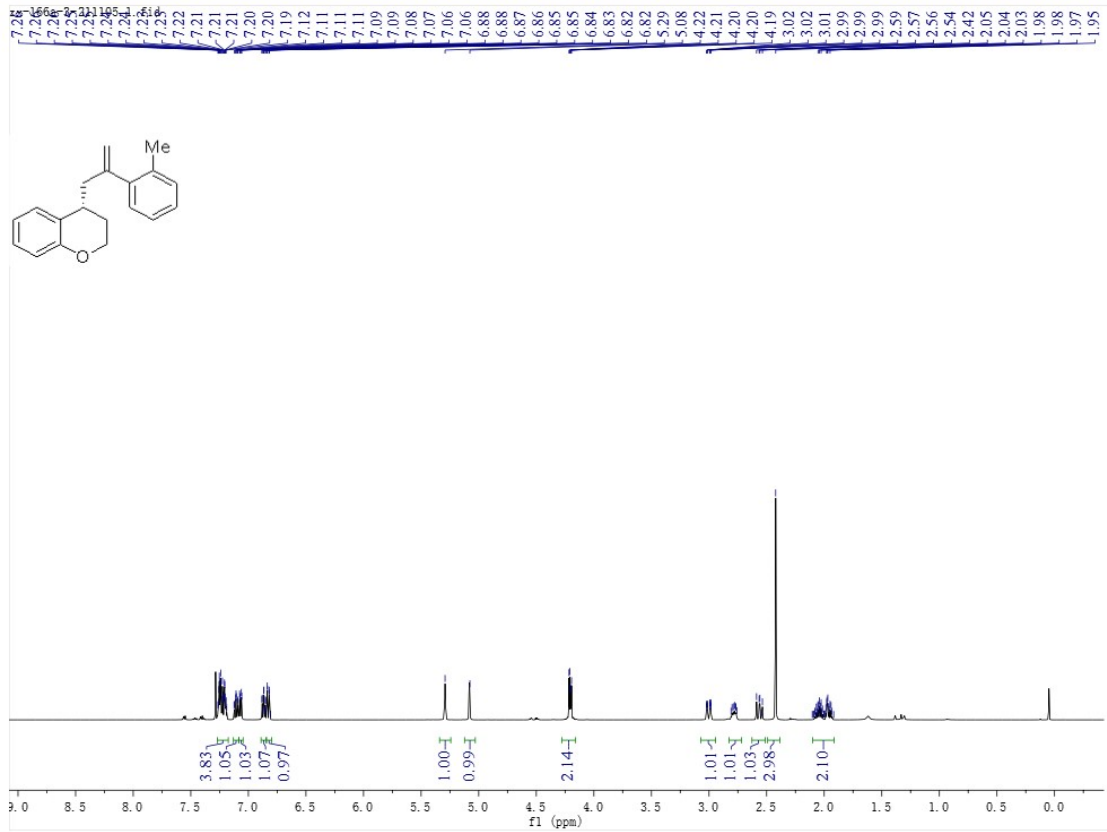

zx-166a-3-211105.2.fid

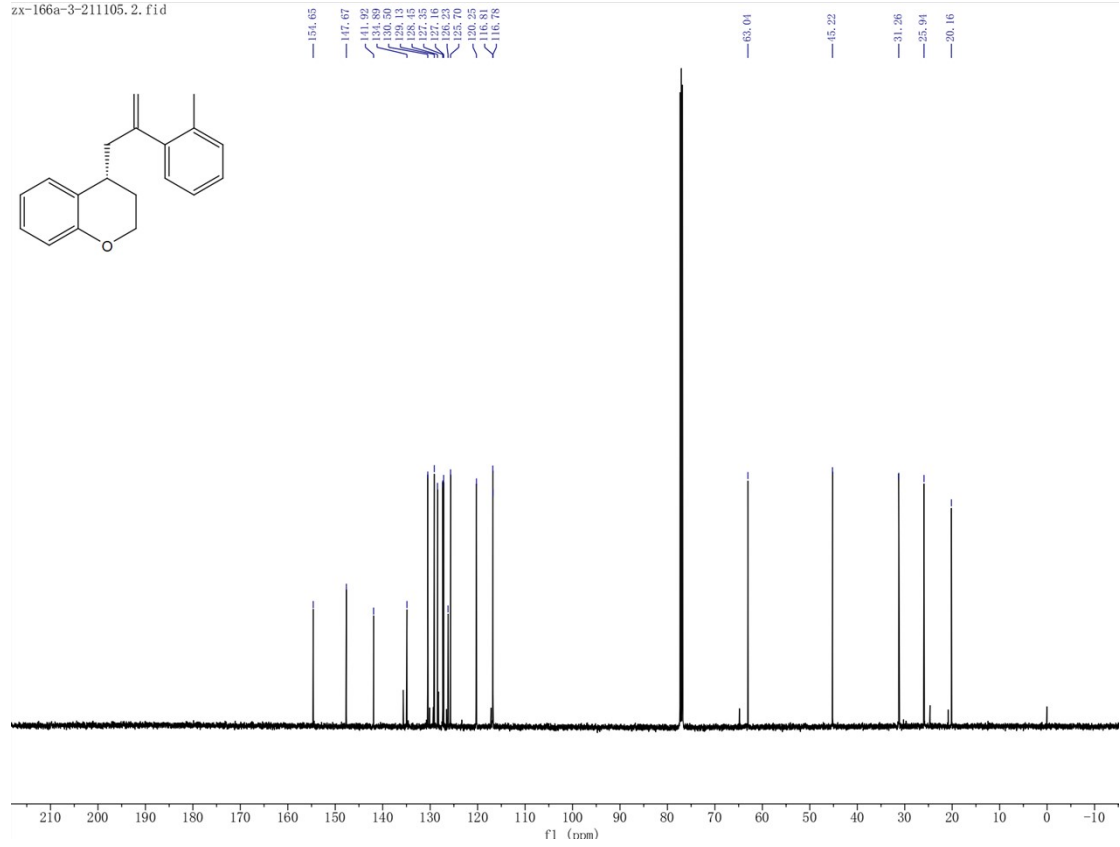

### Compound 3an

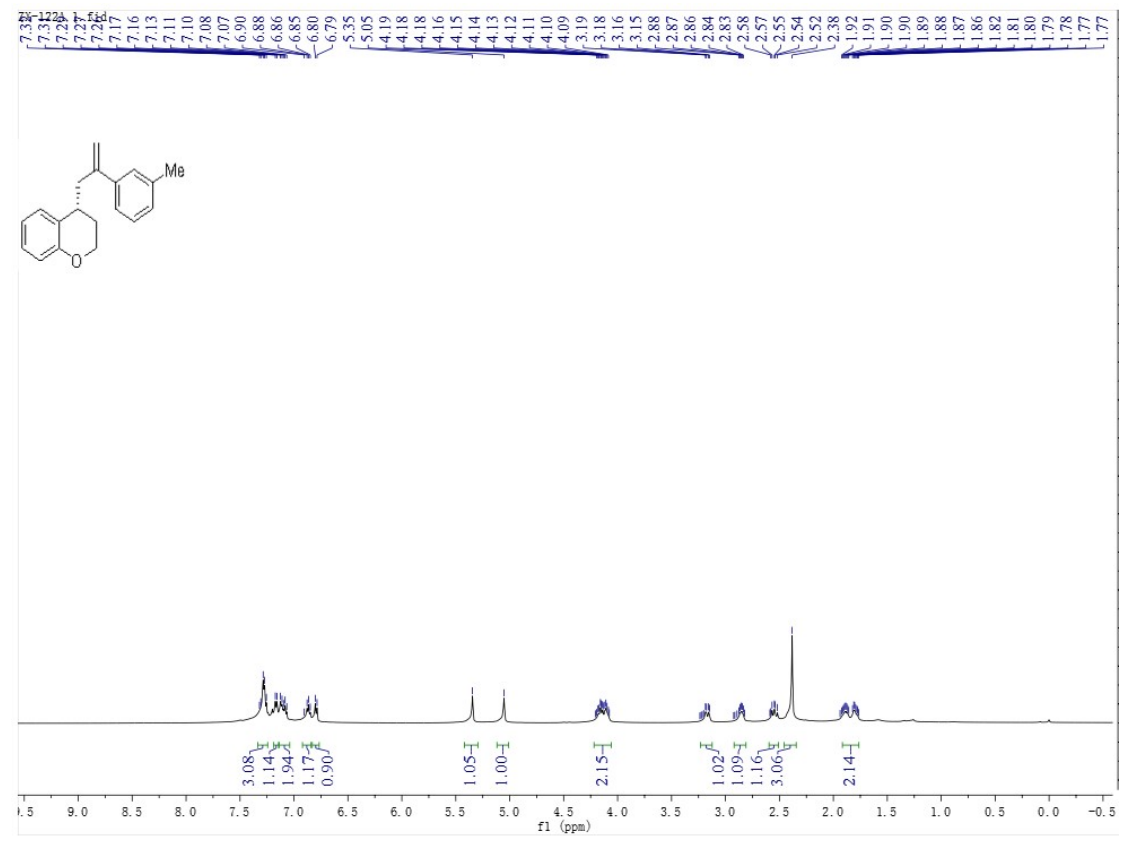



ZX-153A-2.13.fid

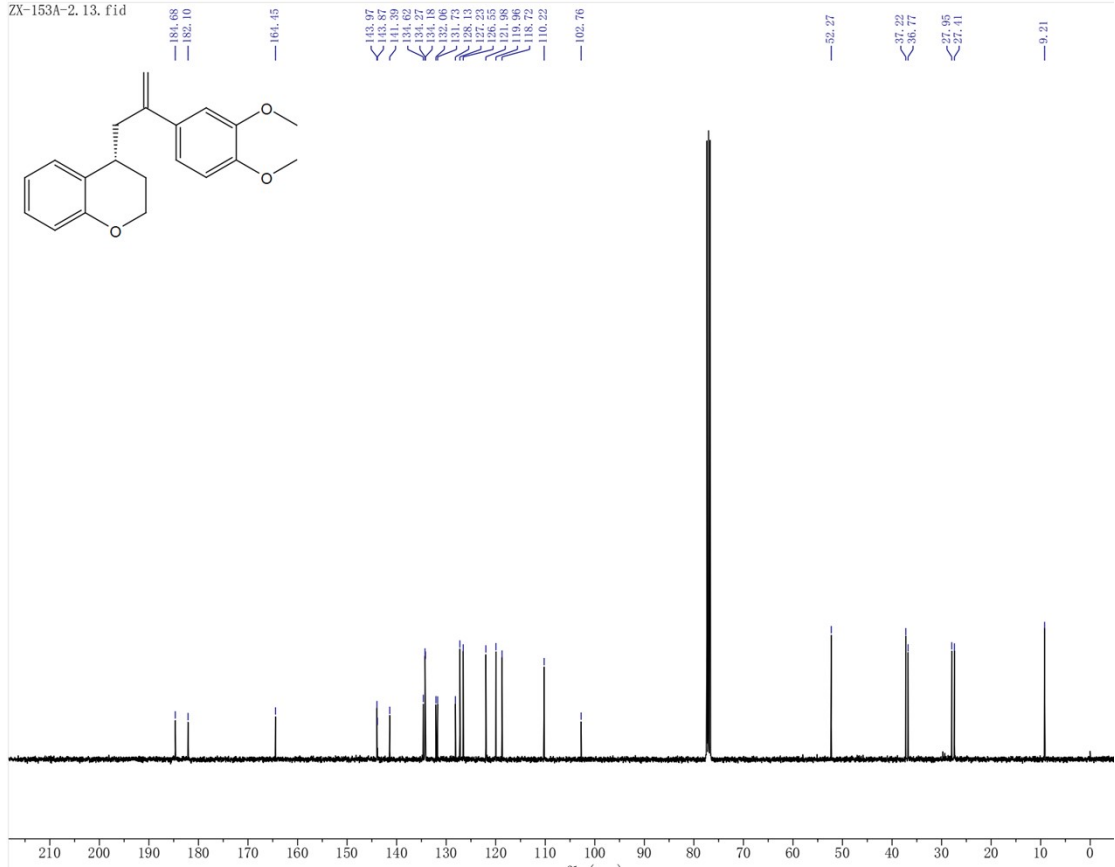

### Compound 3ap

zx-156a-2.1.fid

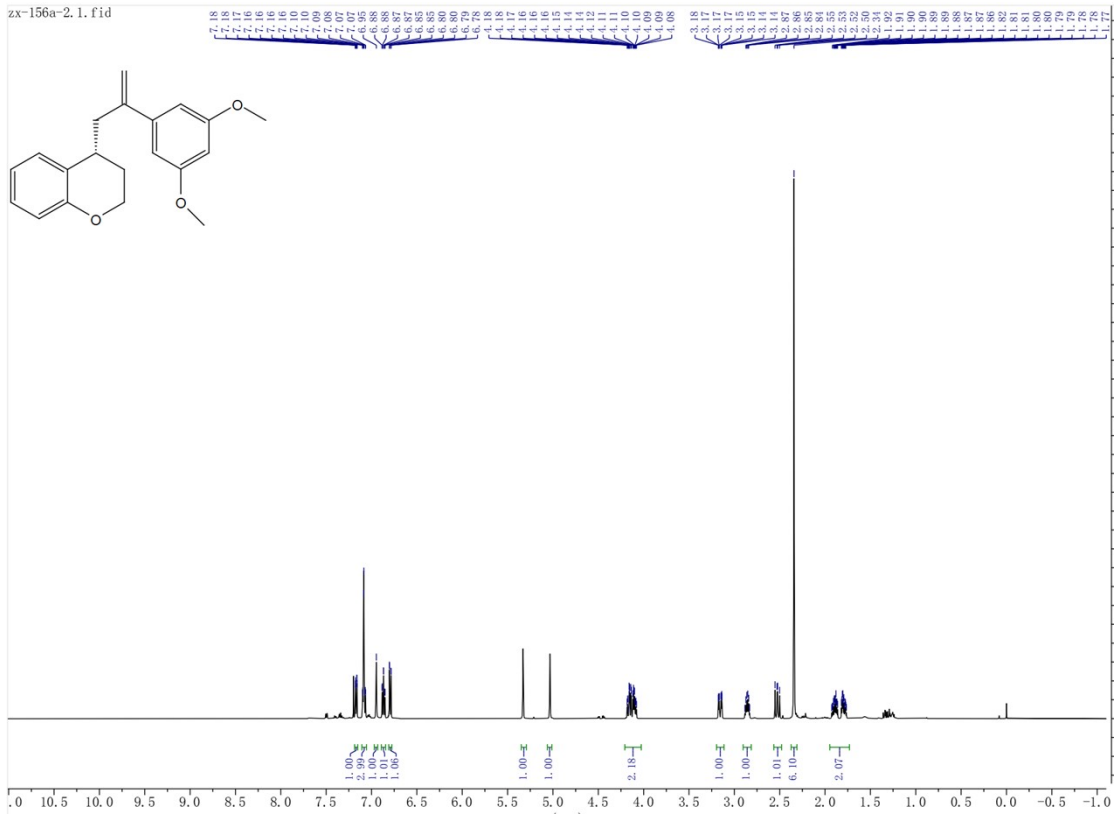



zx-156a-2.2.fid

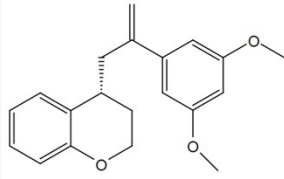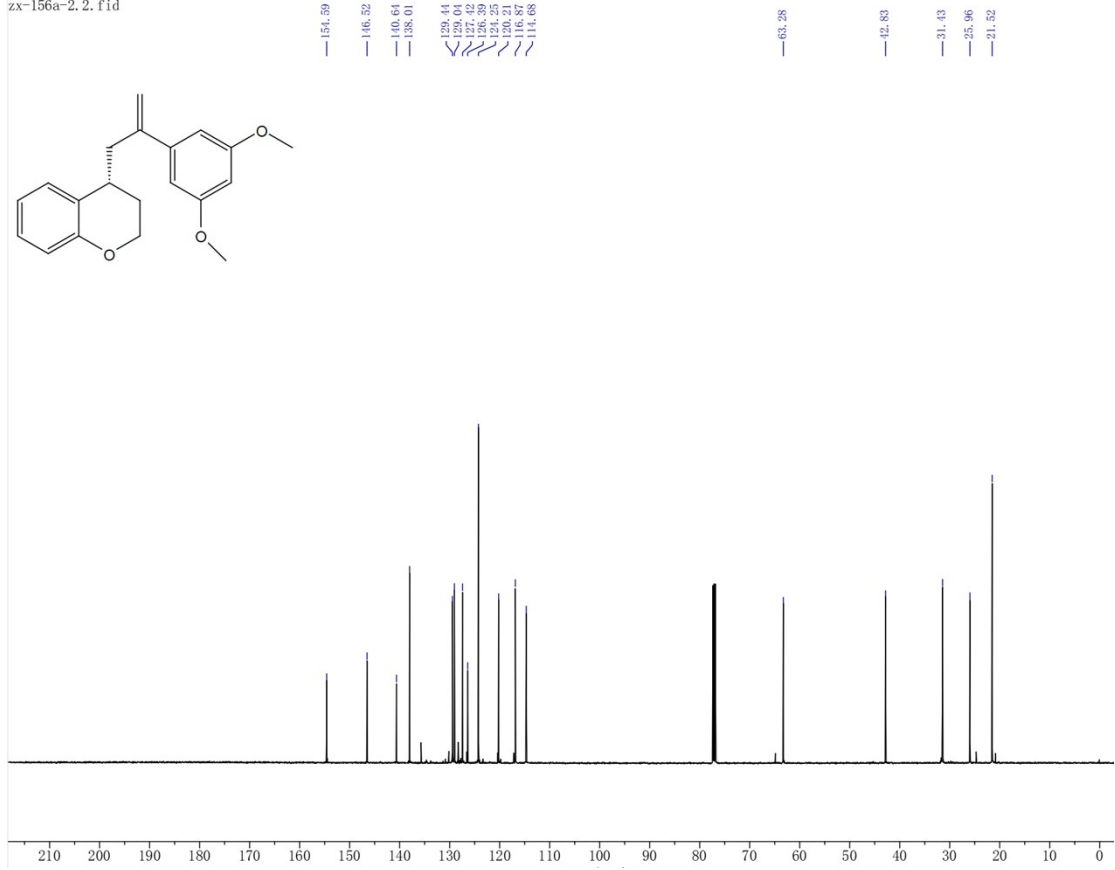

### Compound 3aq

zx-167a-3-211105.1.fid

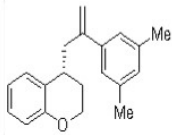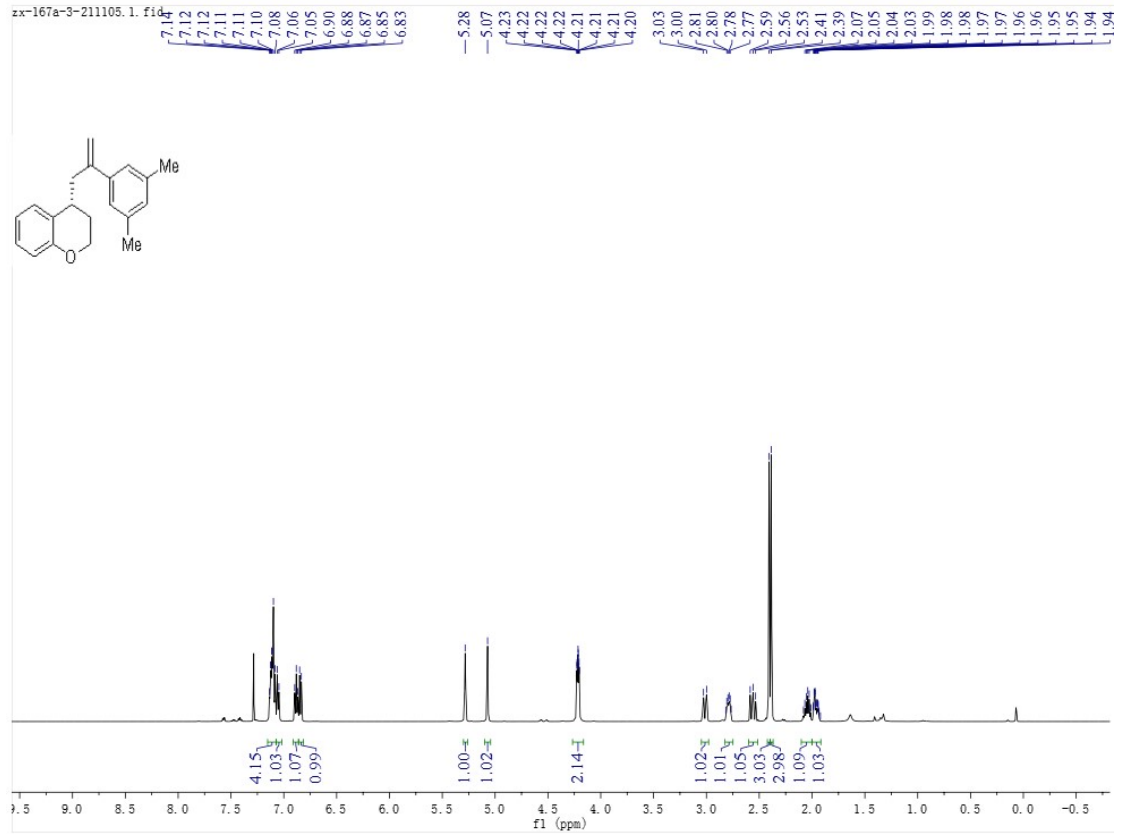

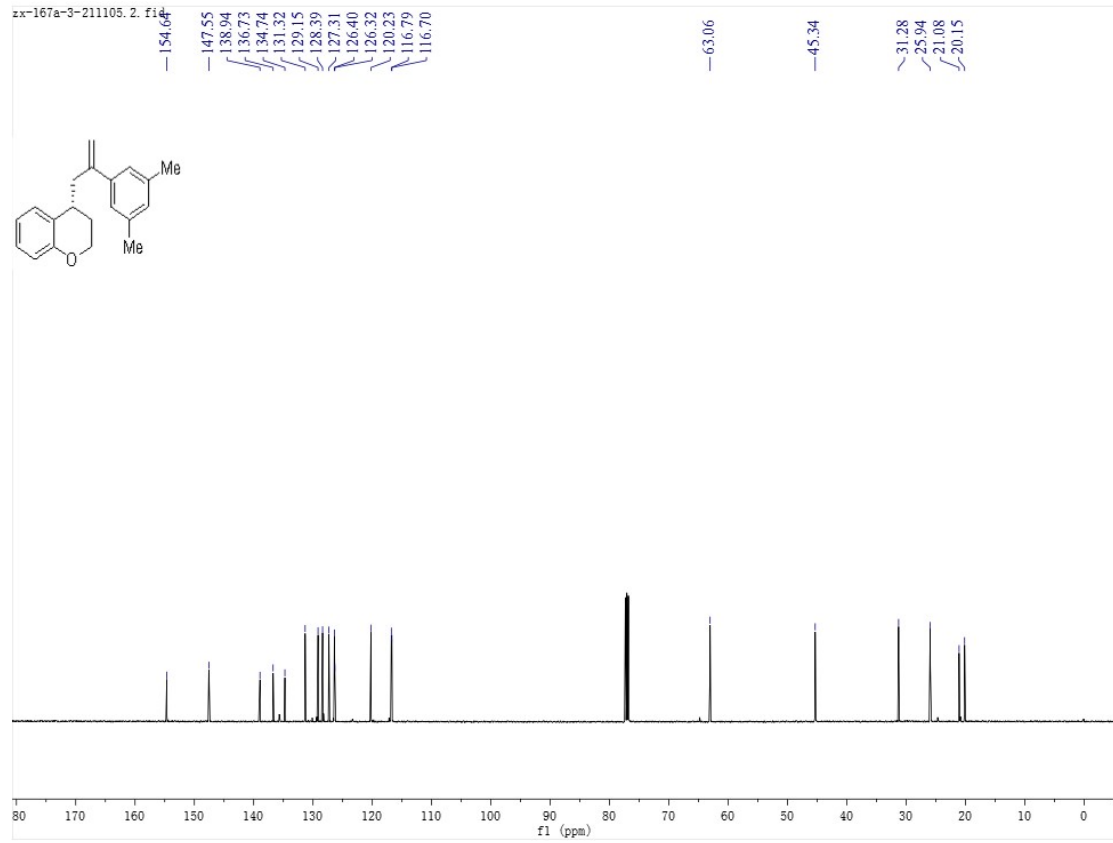

### Compound 3ar

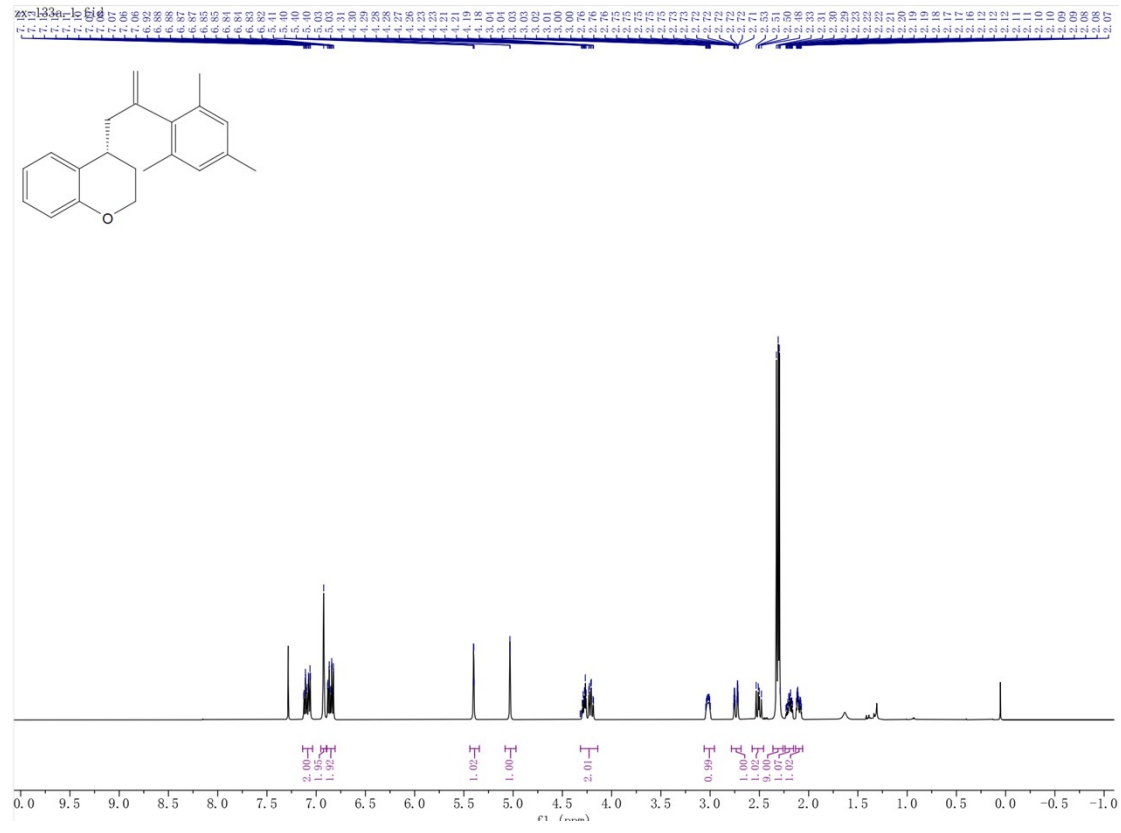

zx-133a. 2. fid

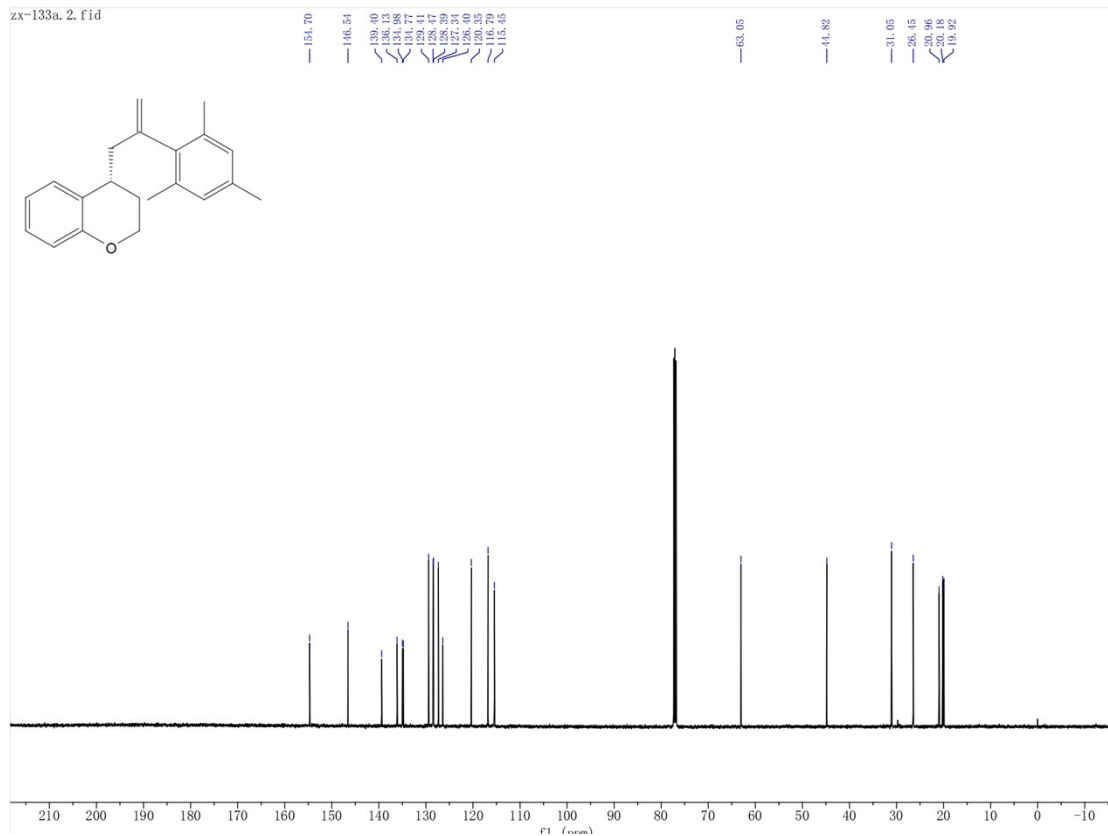

### Compound 3as

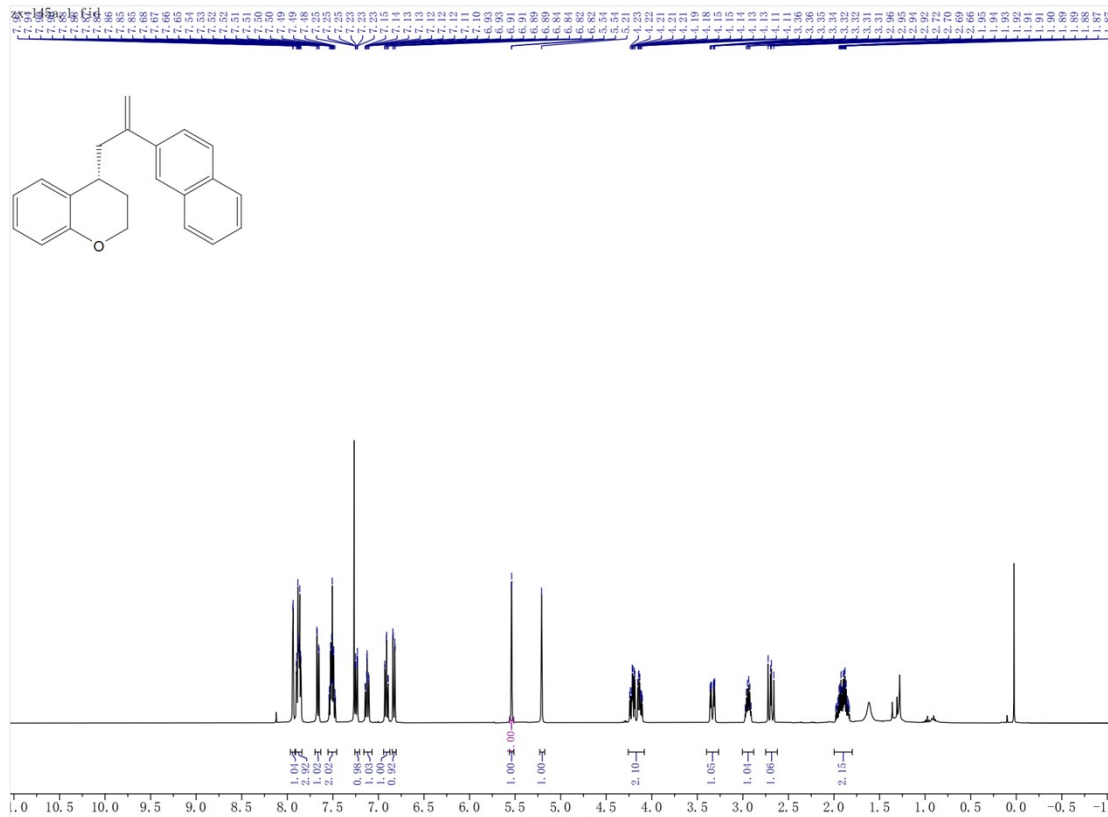

zx-145a-c13. 1. fid

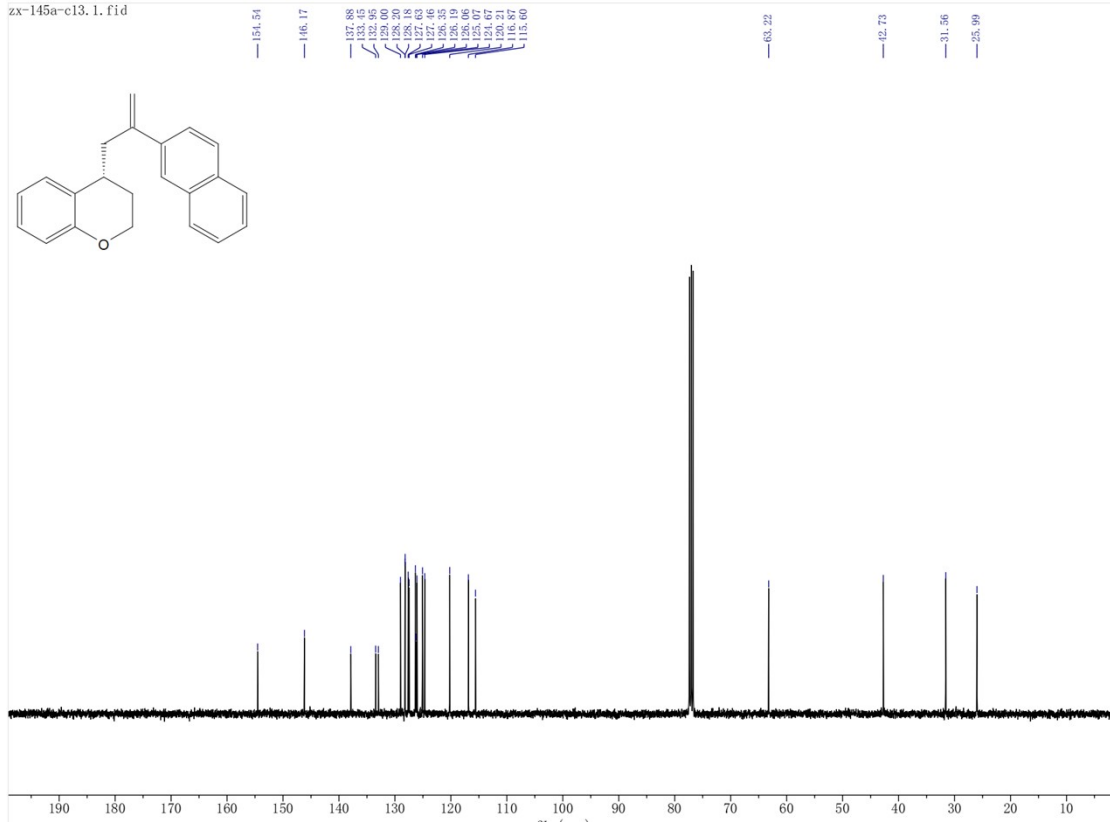

### Compound 3at

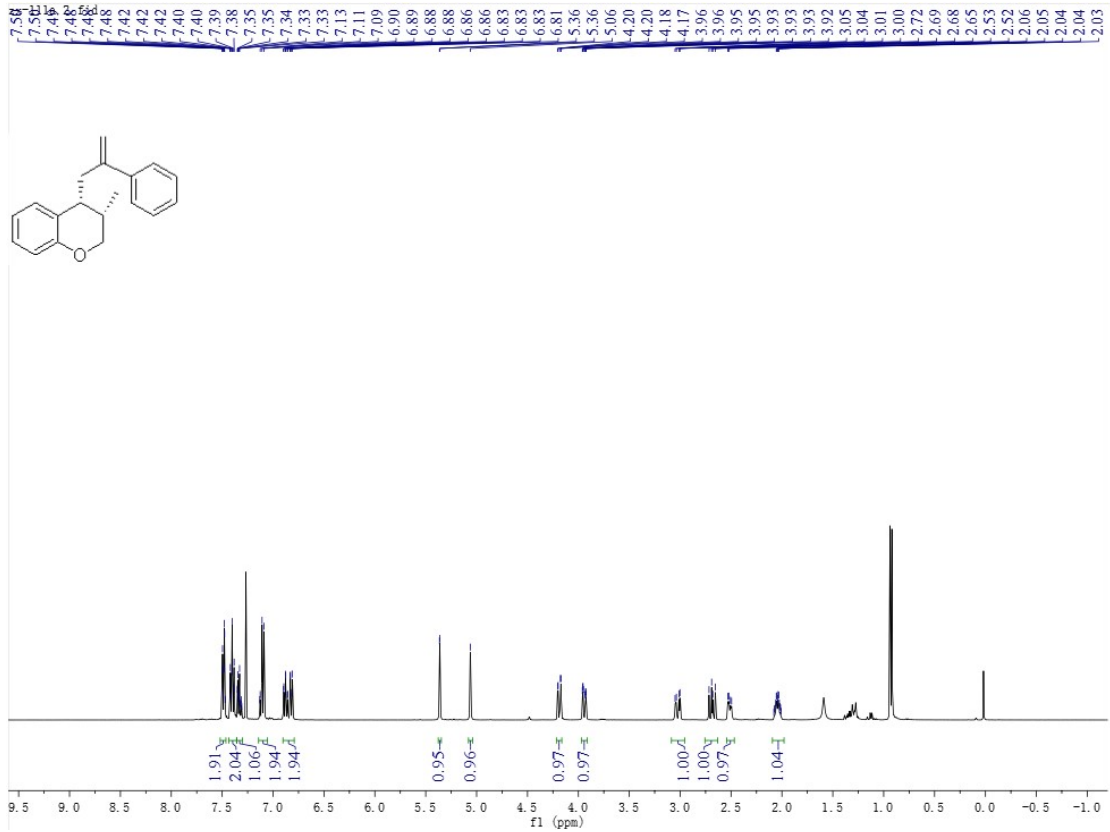

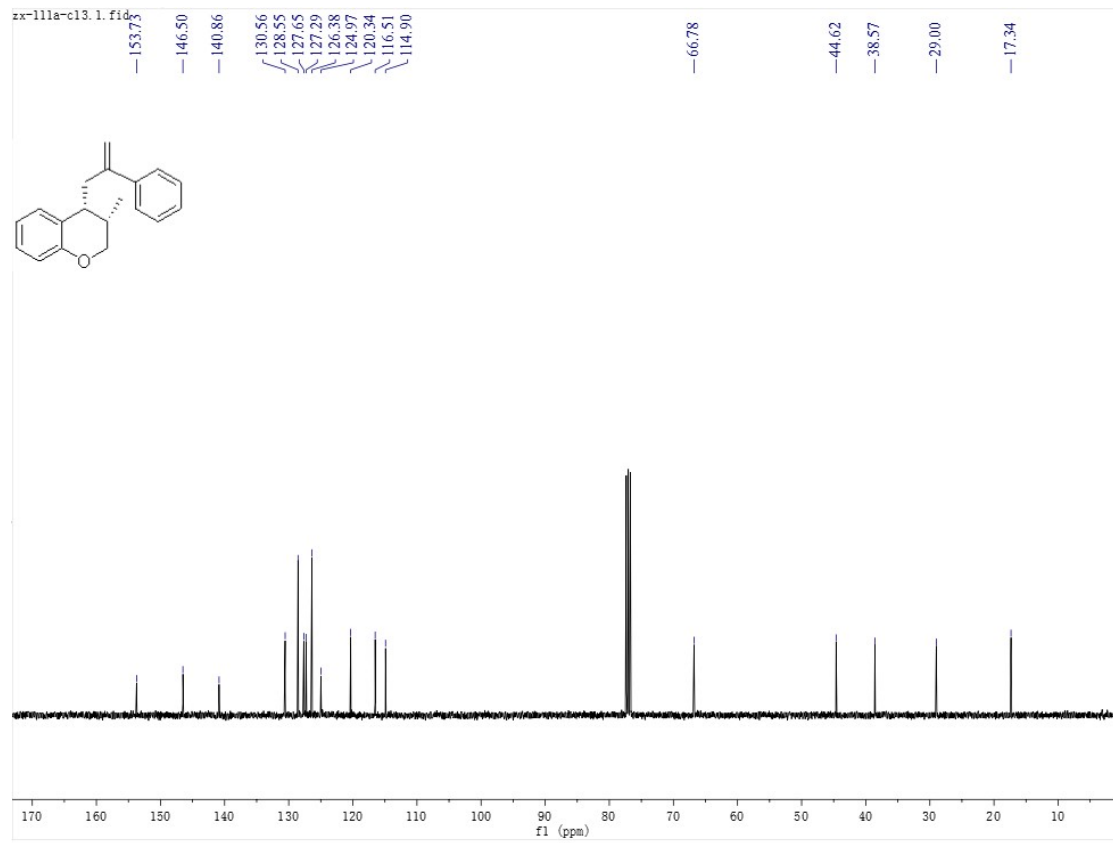

### Compound 3au

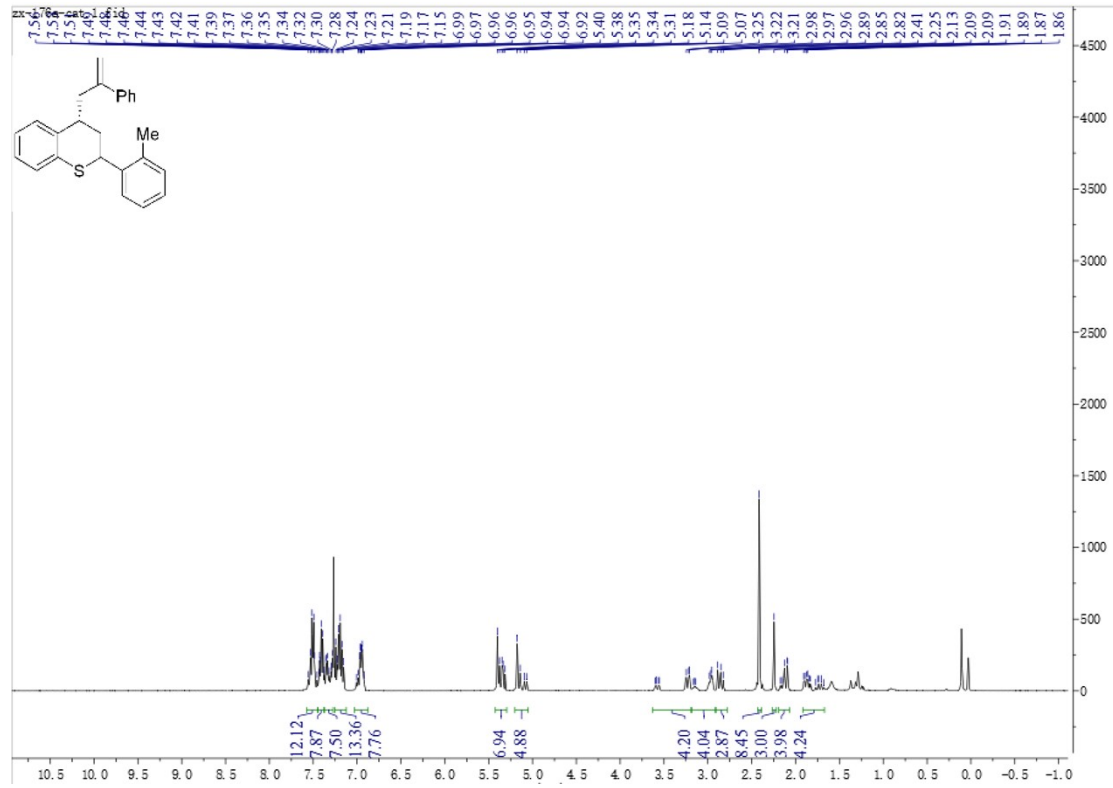

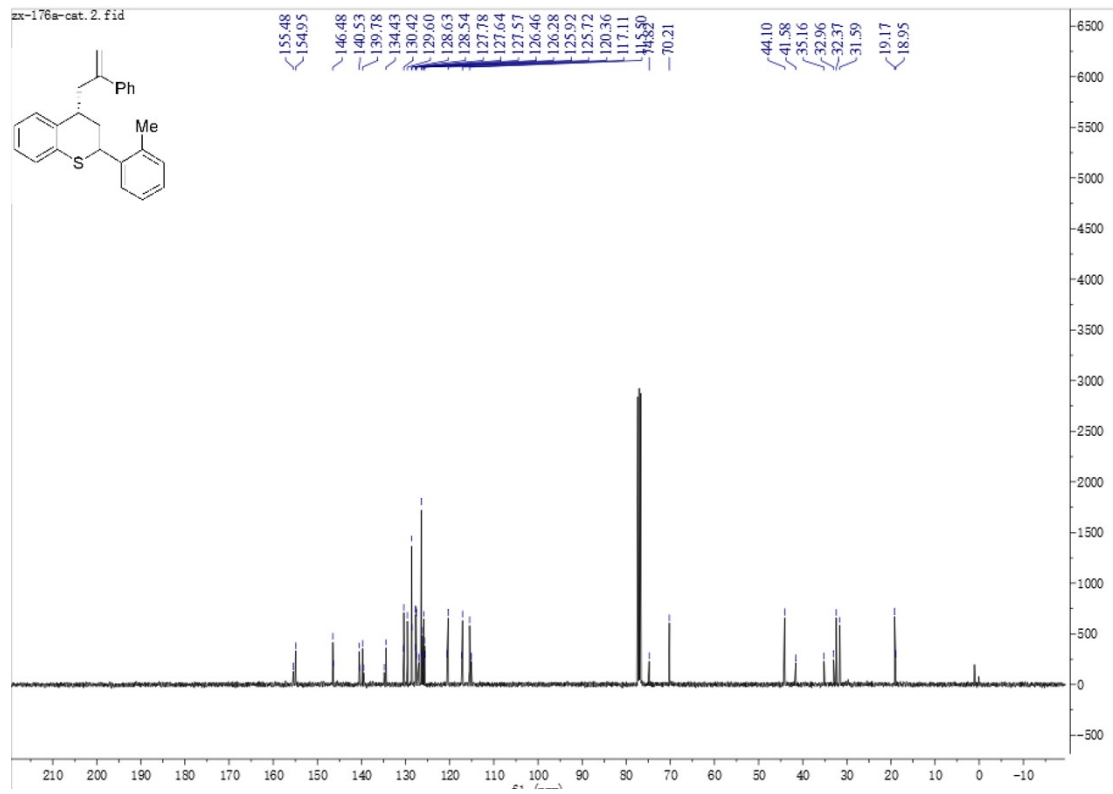

### Compound 3av

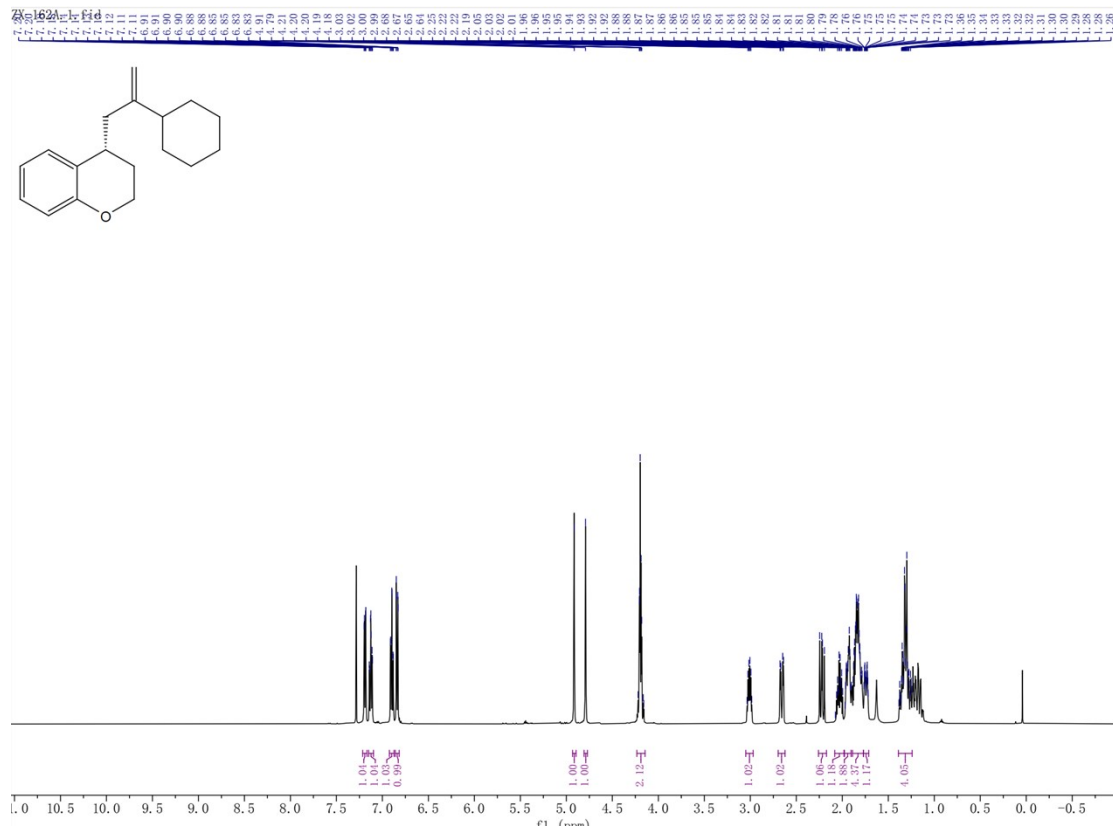

ZX-162A. 2. fid

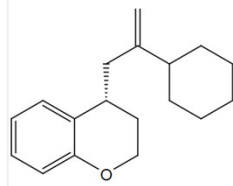

154.57  
152.45  
129.16  
127.32  
126.56  
120.14  
116.81  
109.63  
63.22  
43.59  
42.60  
32.95  
32.21  
28.97  
26.76  
25.97

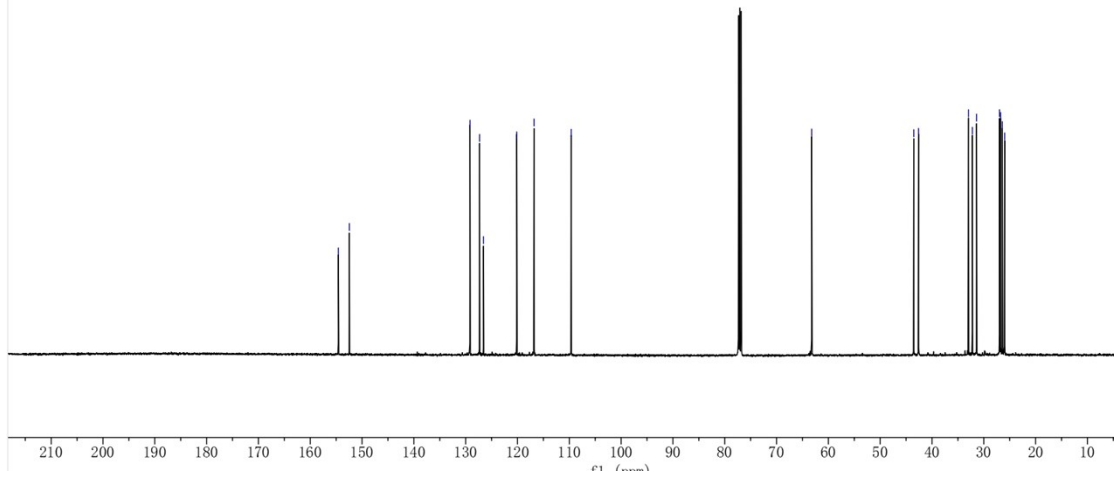

### Compound 3aw

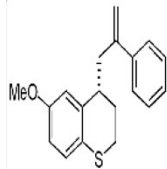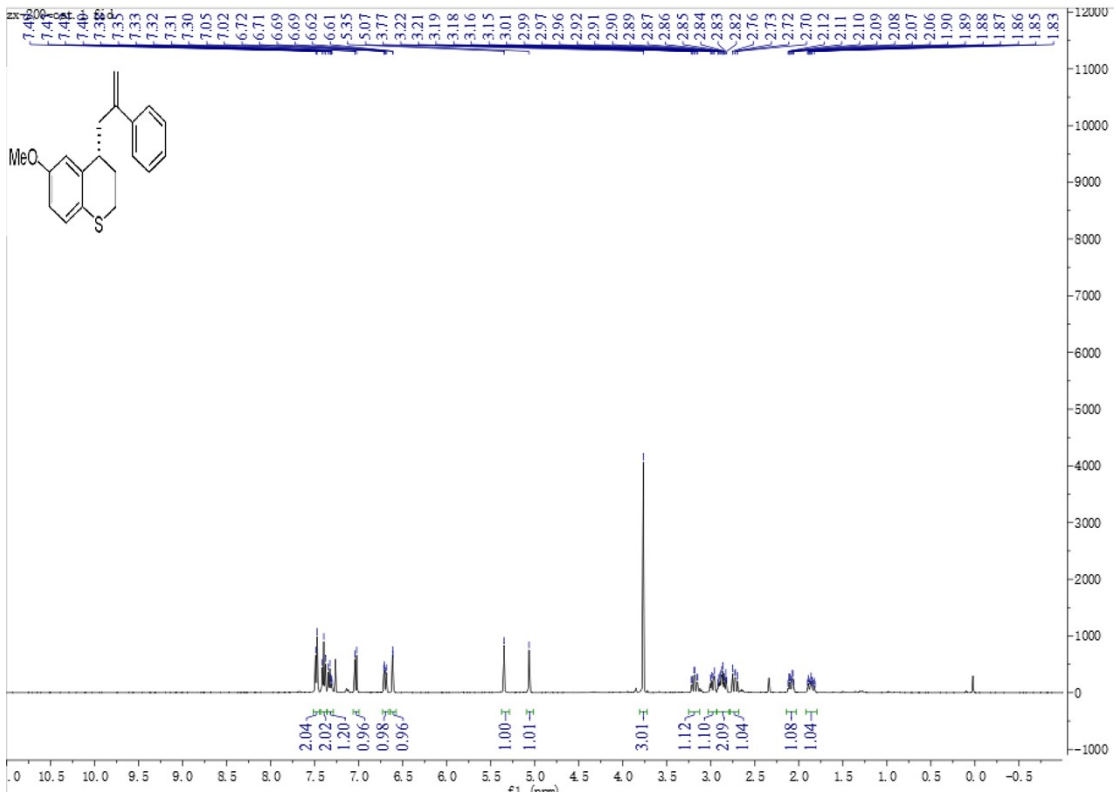

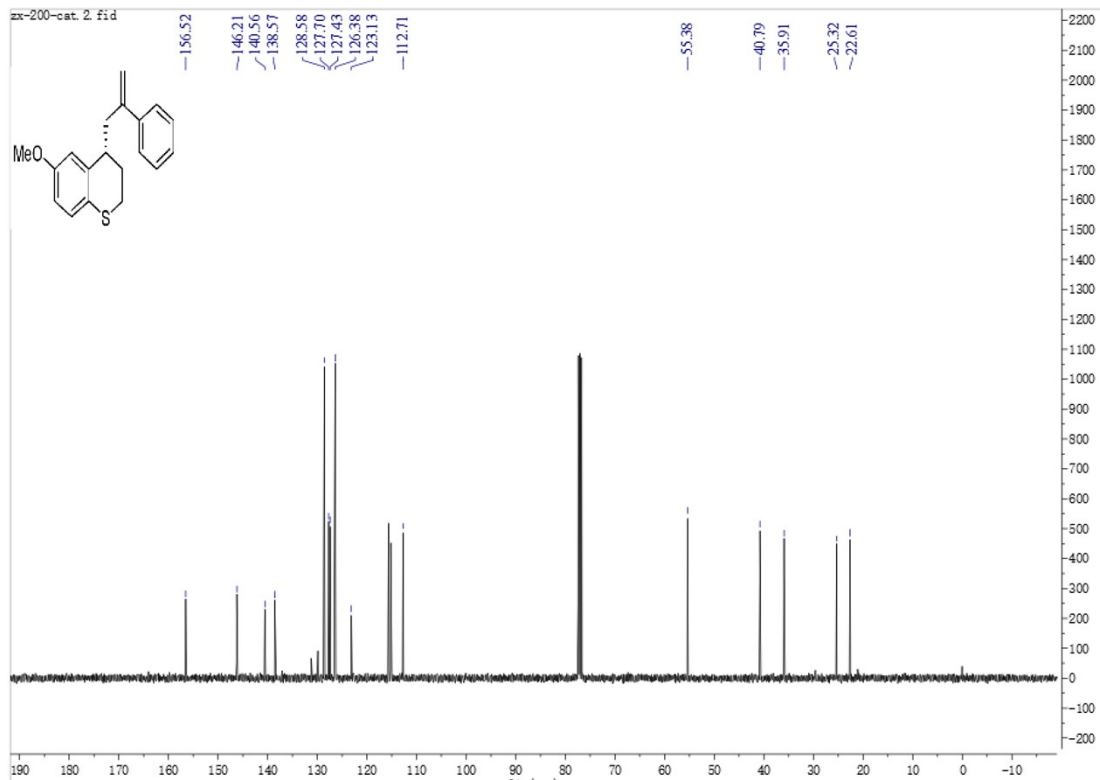

### Compound 3ax

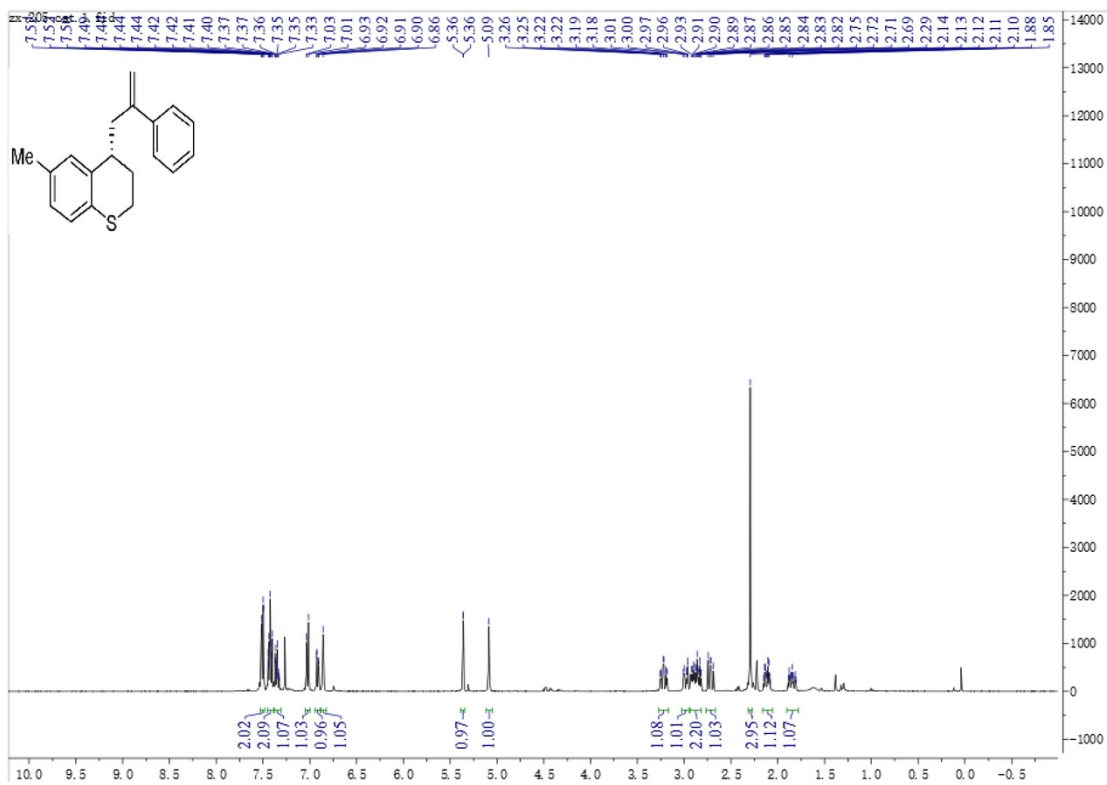



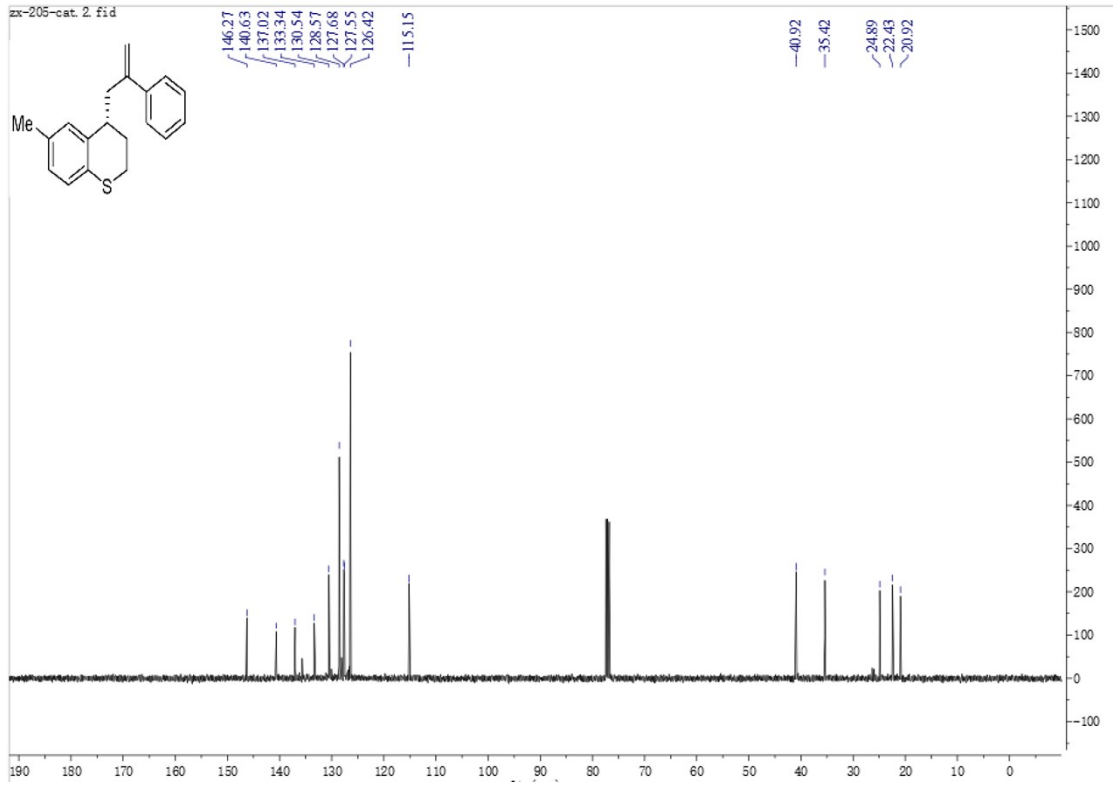

**Compound 3ay**

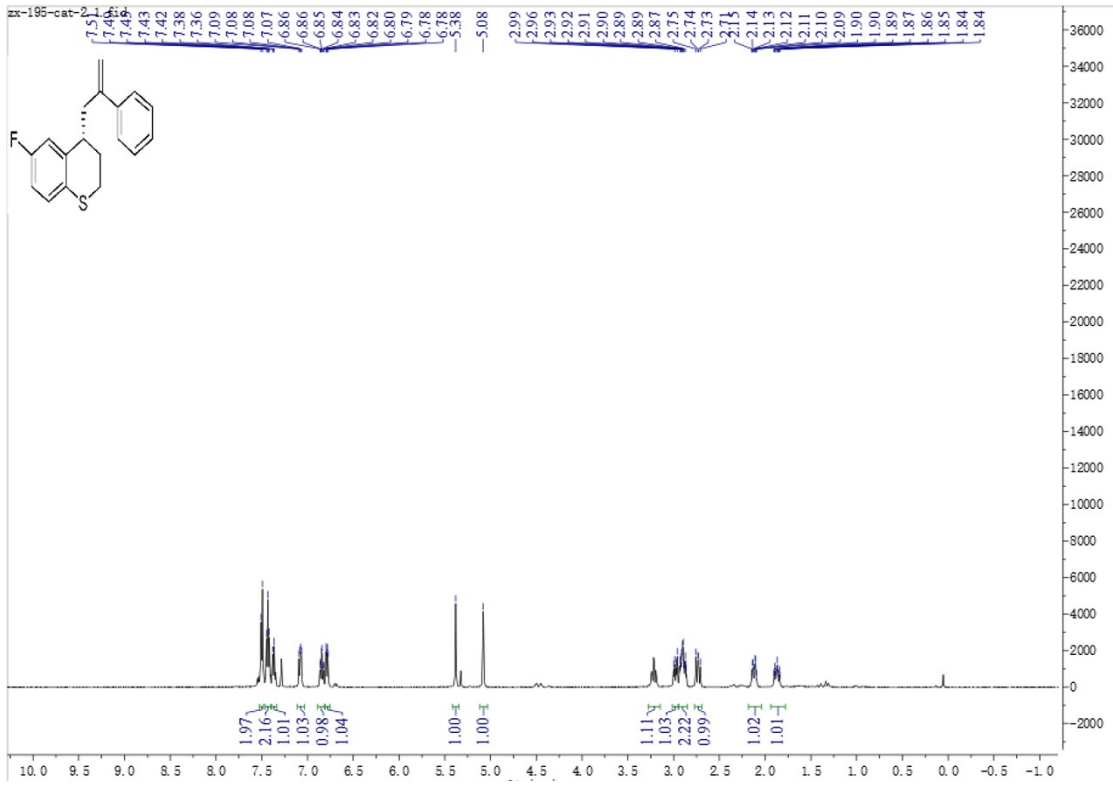

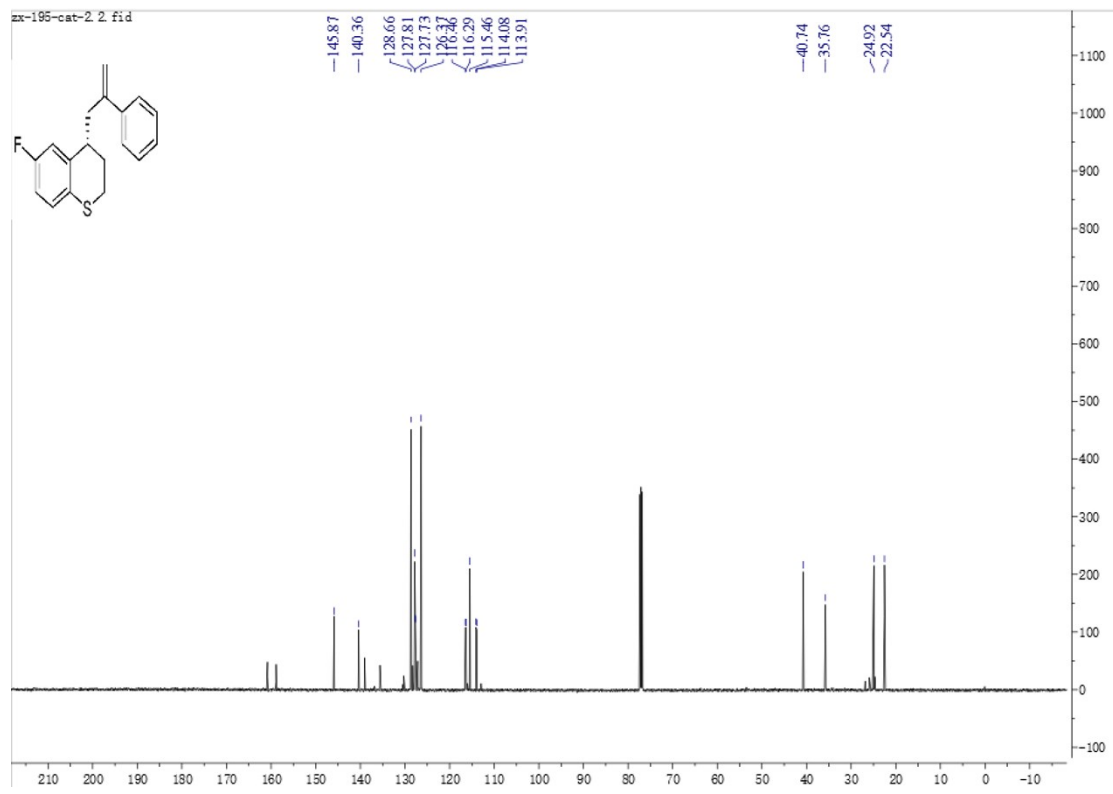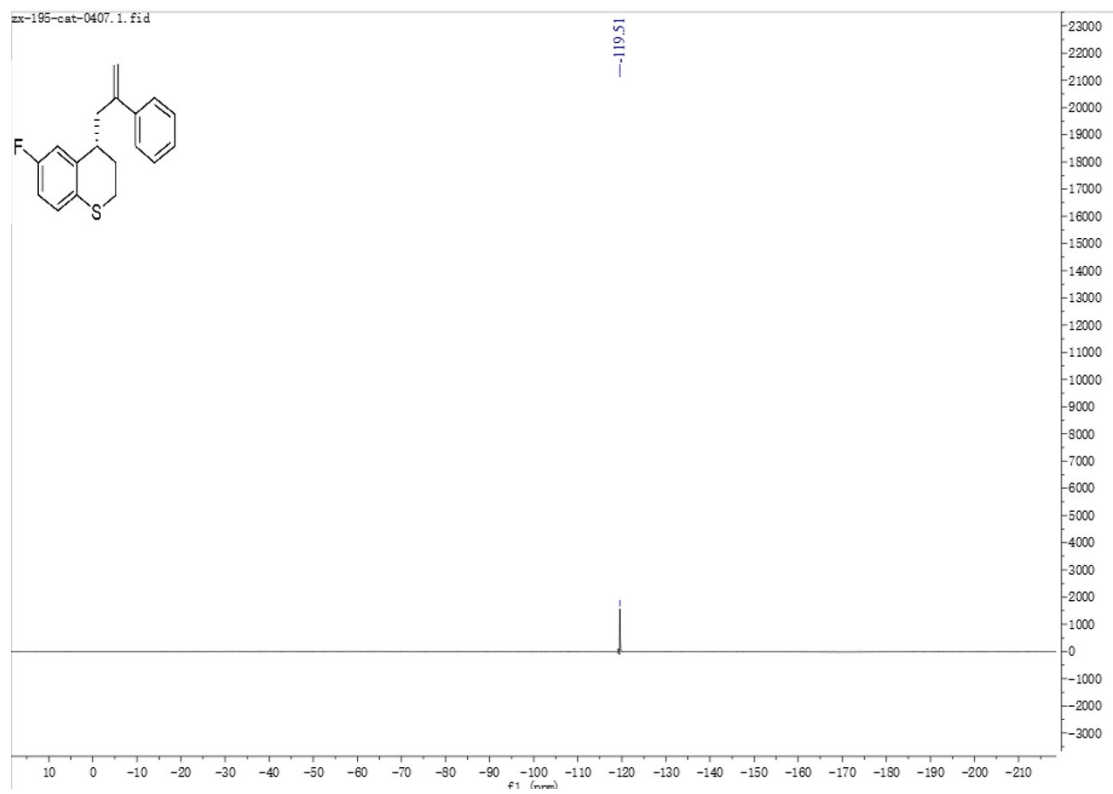

**Compound 3az**

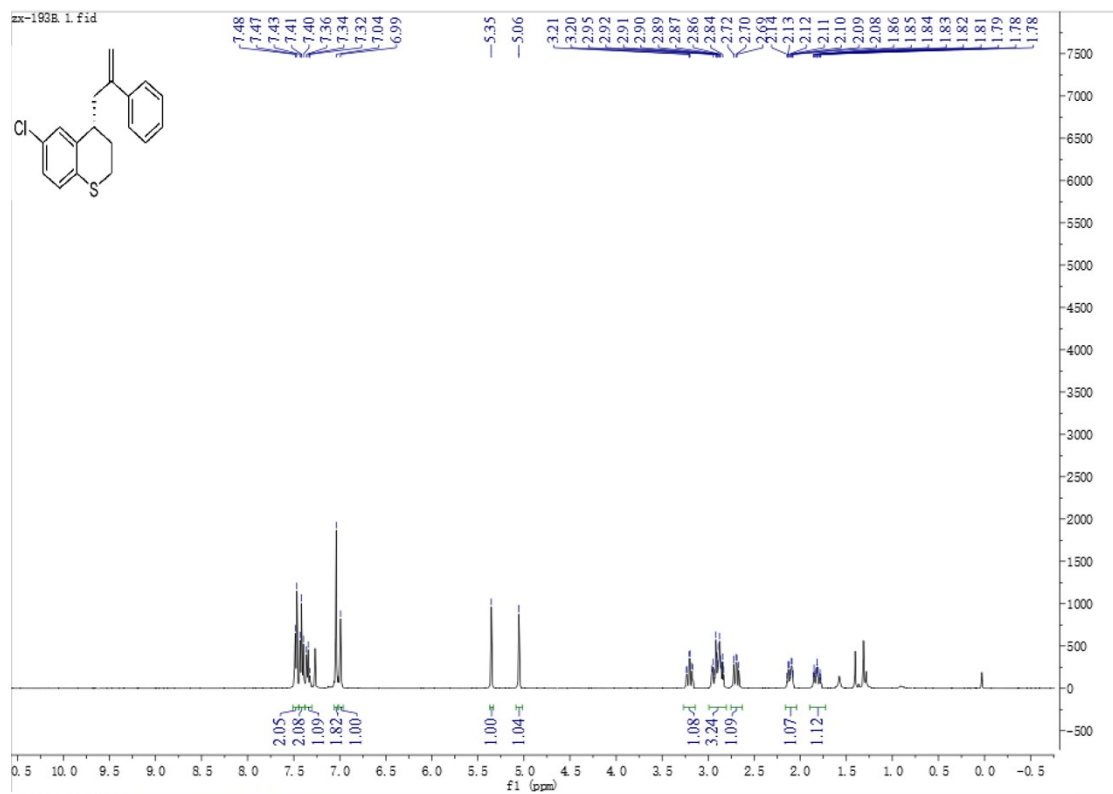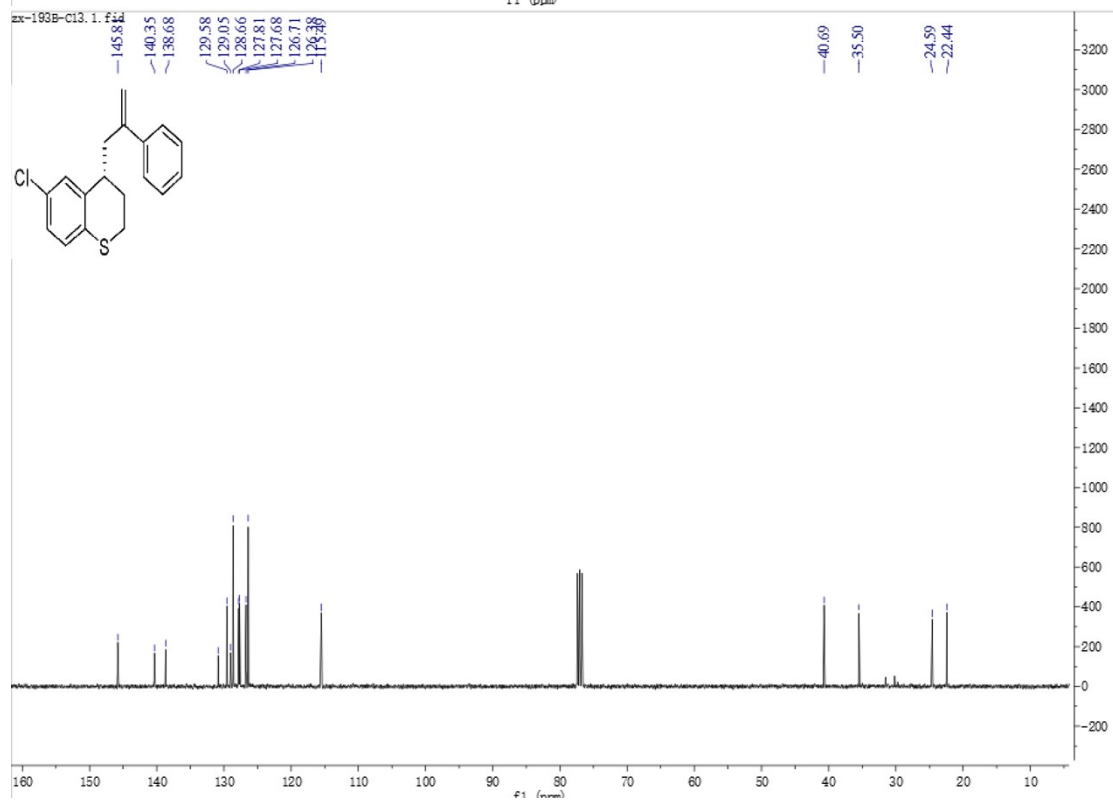

**Compound 3ba**

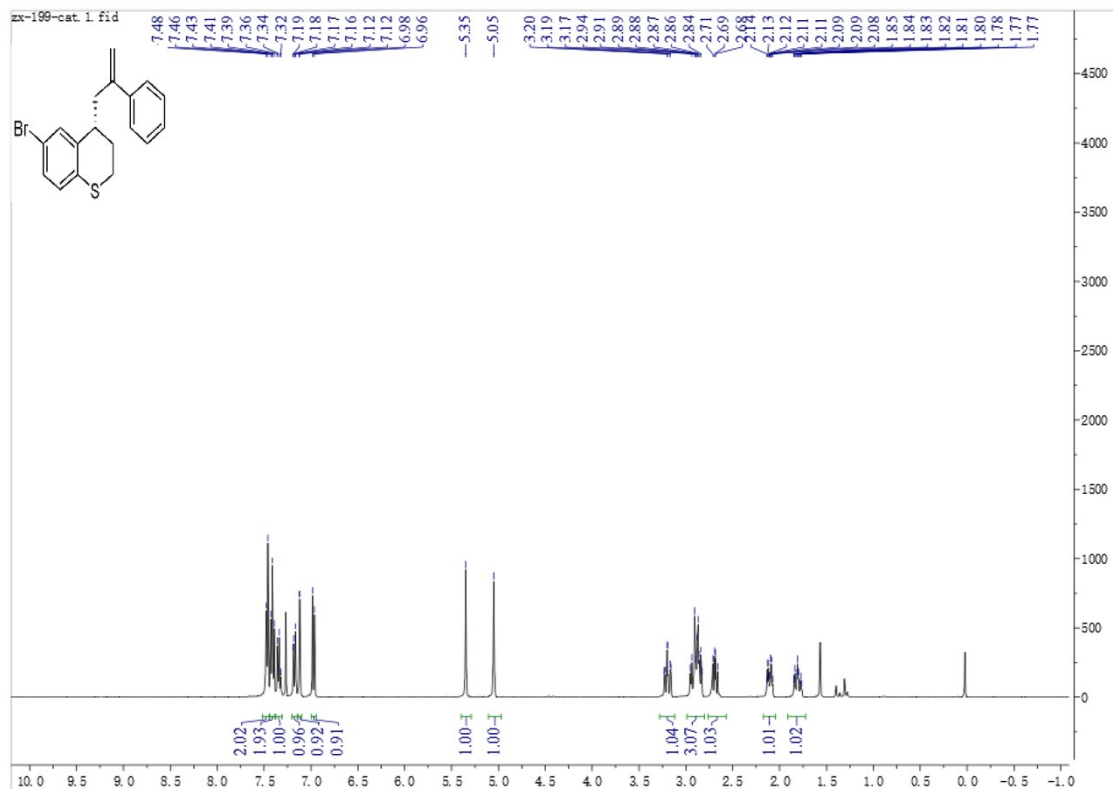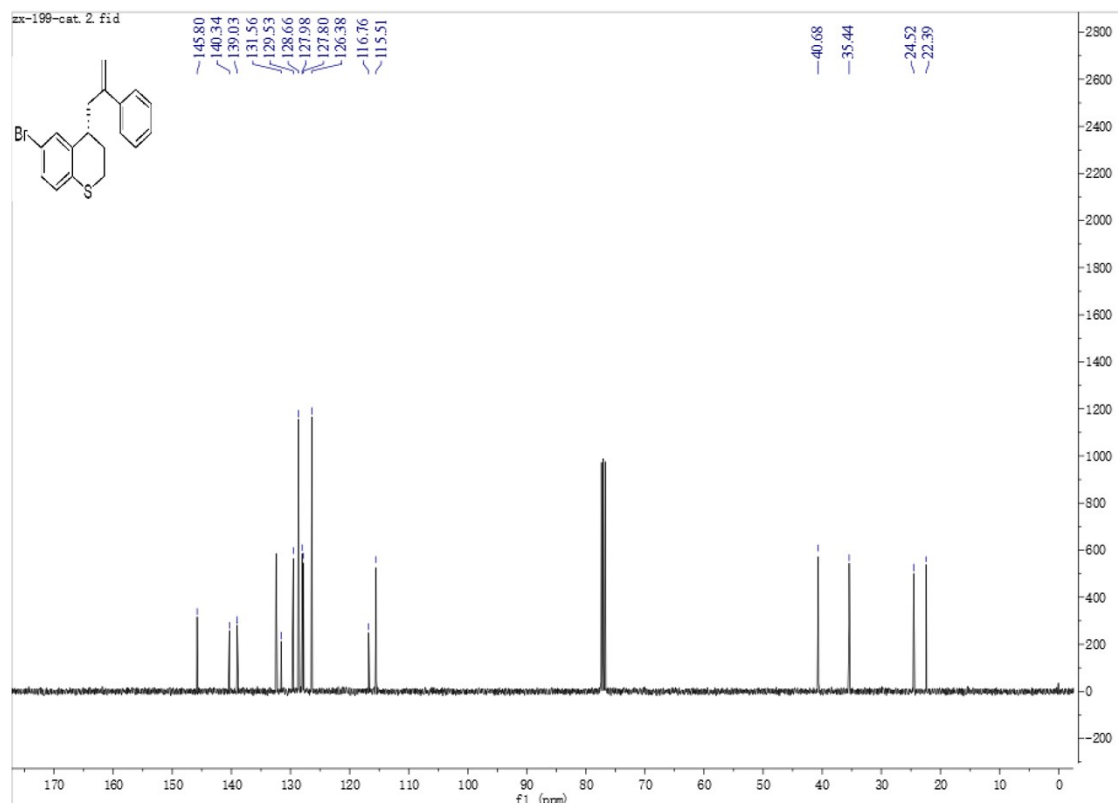

**Compound 3bb**

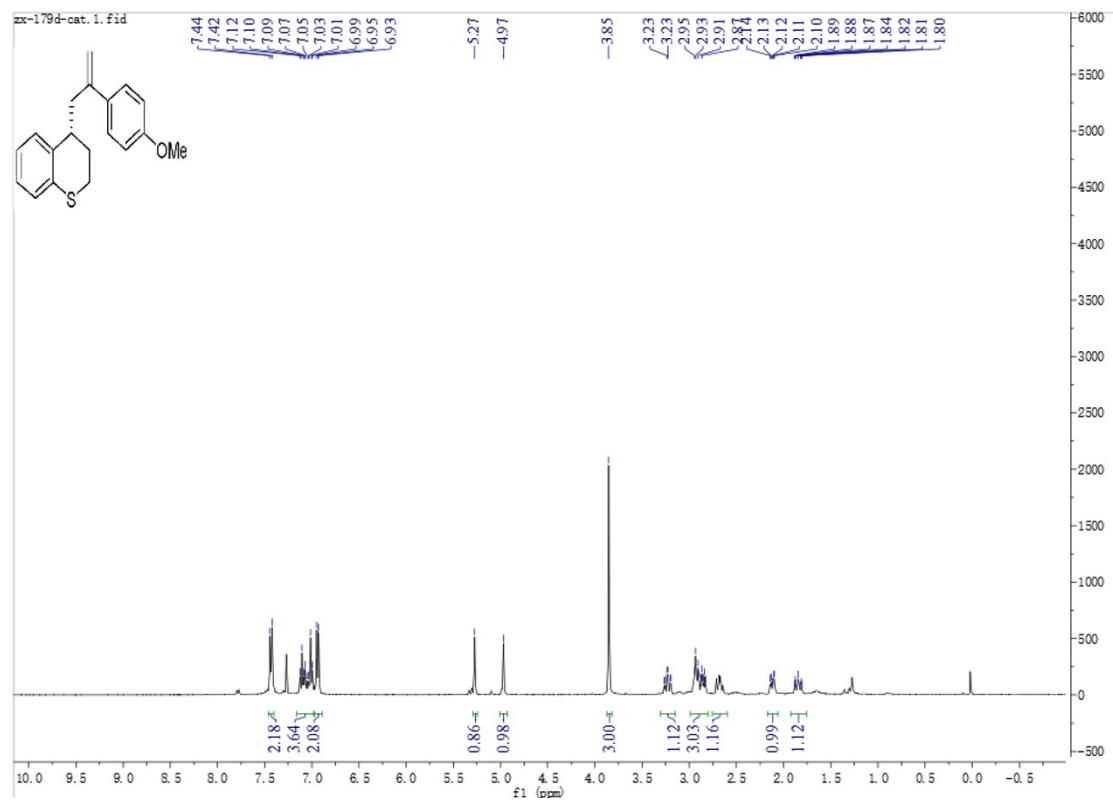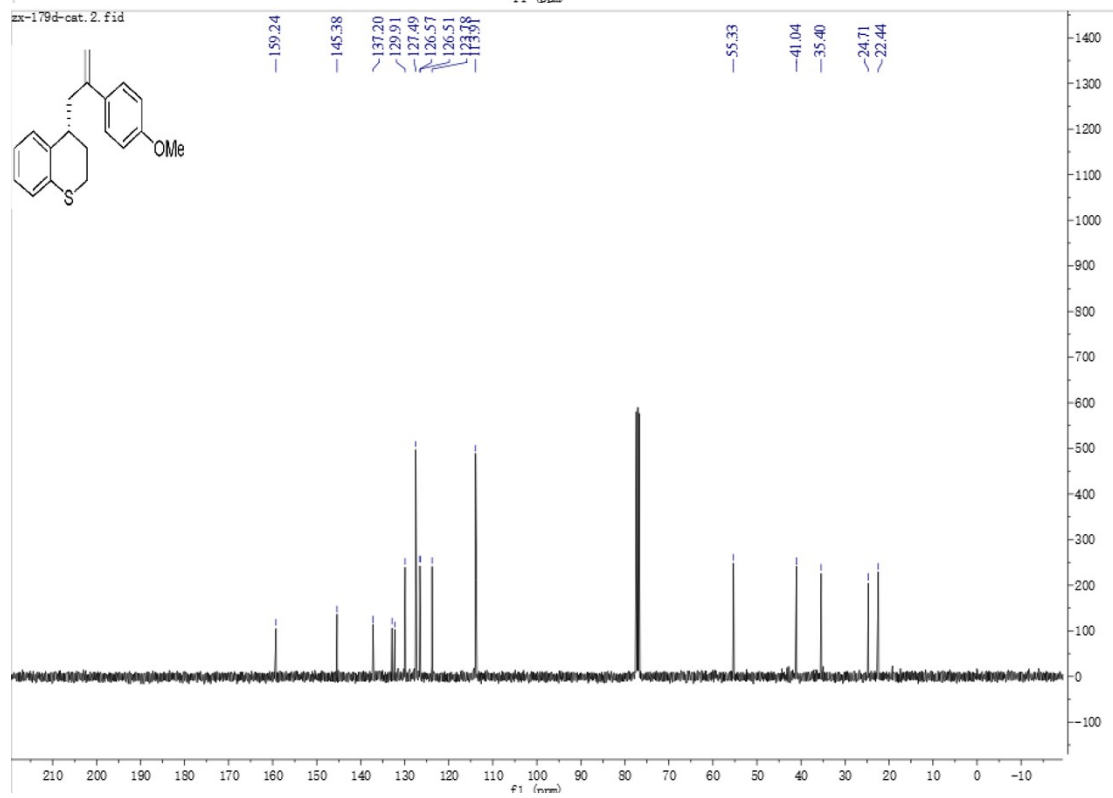

**Compound 3bc**

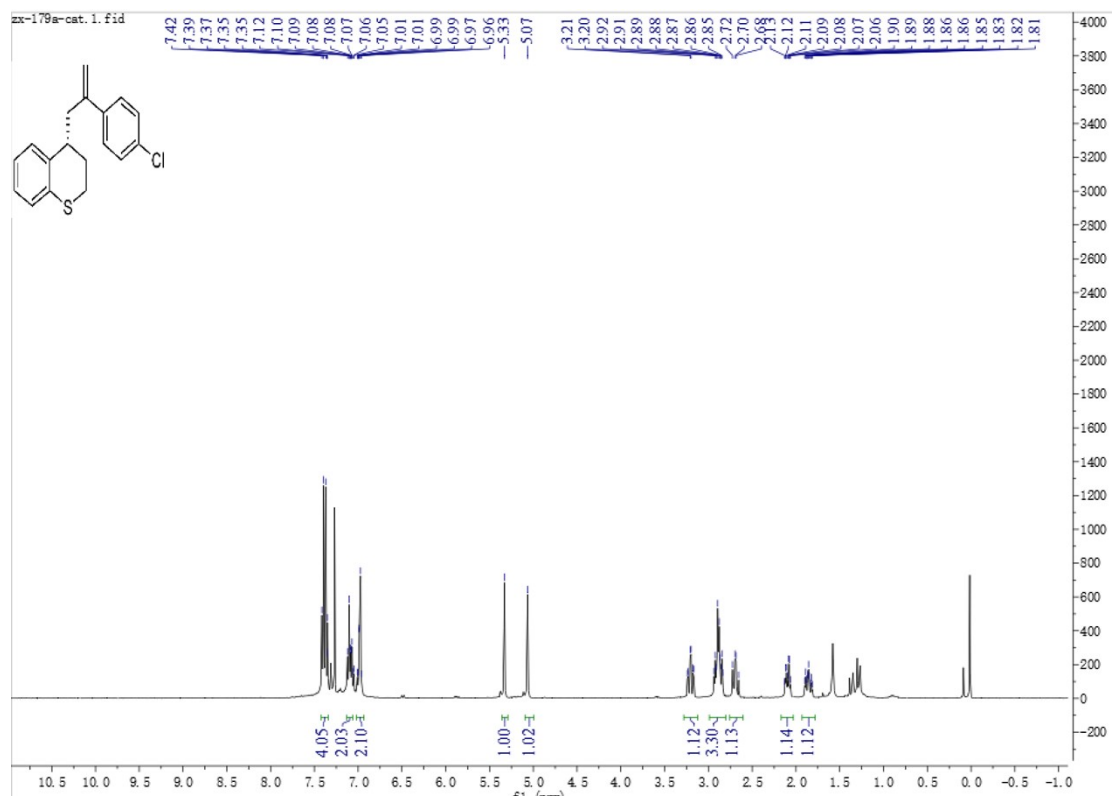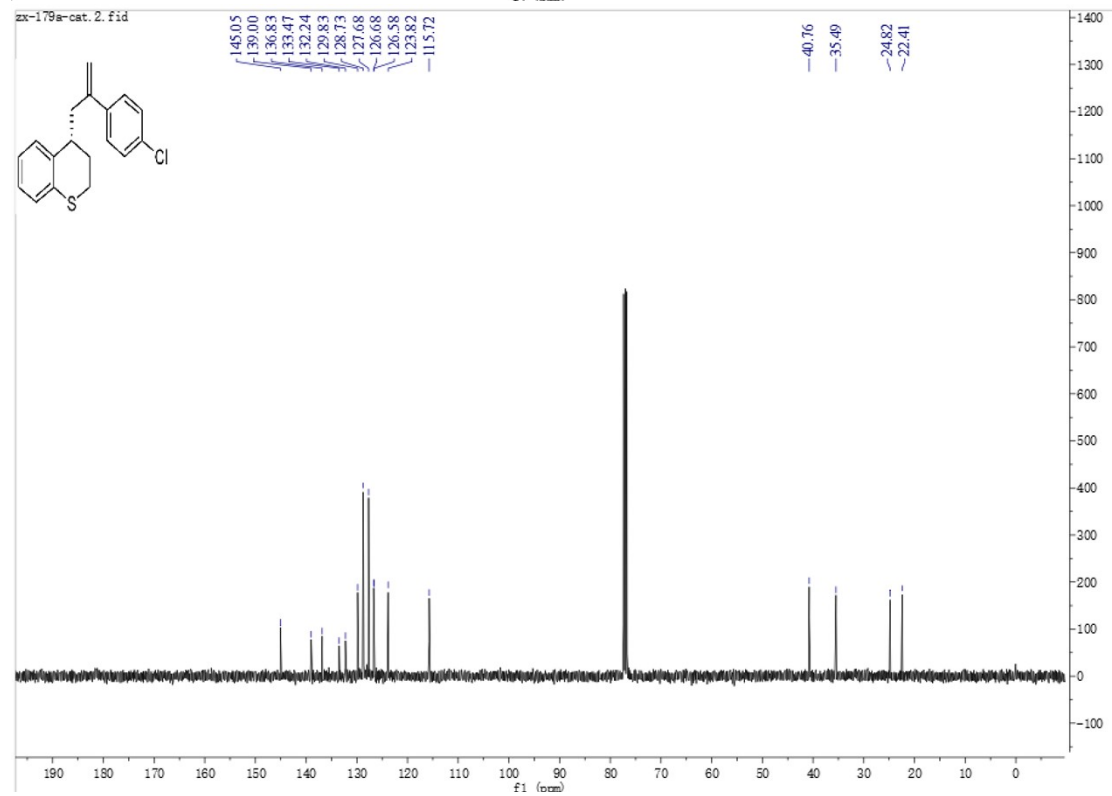

Compound 3bd

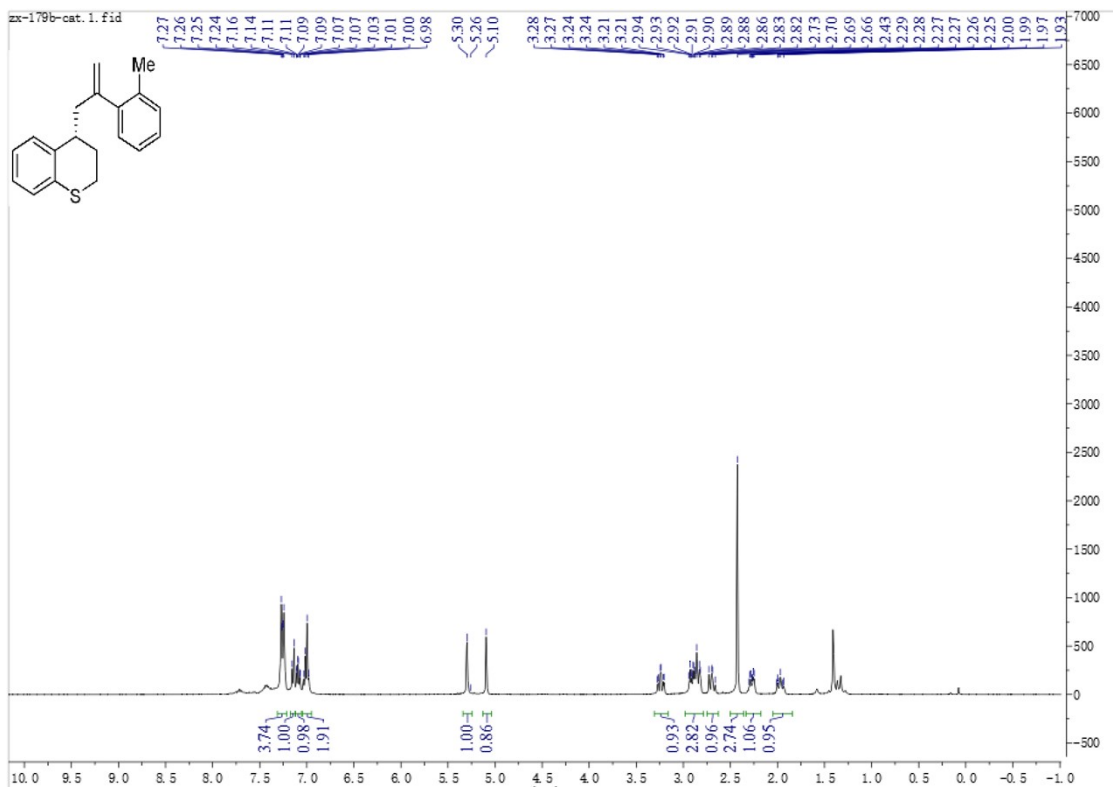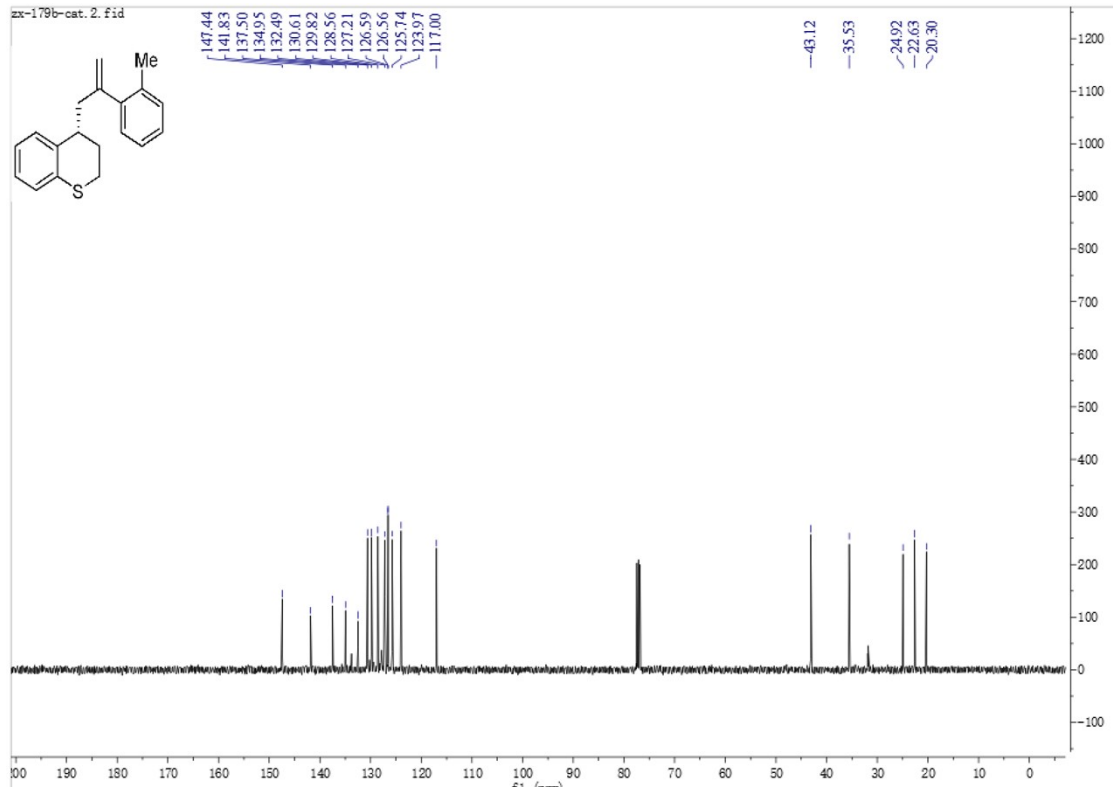

**Compound 3be**







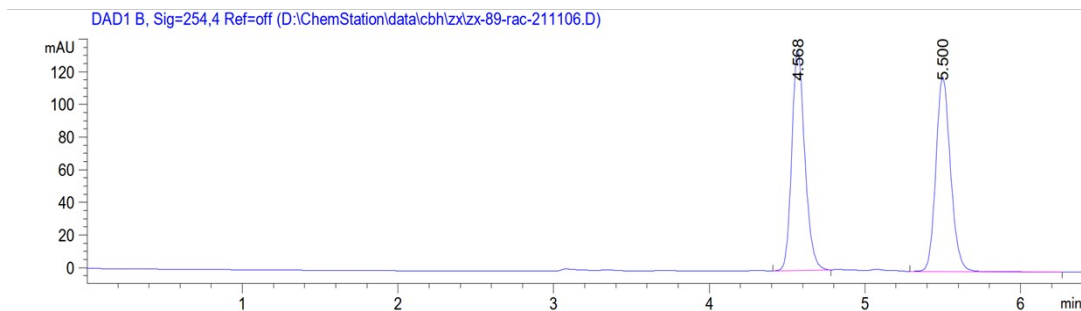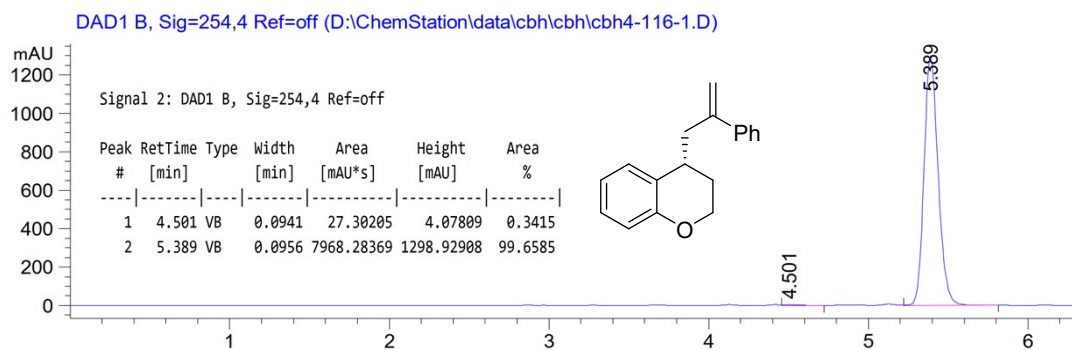

### Compound 3ab

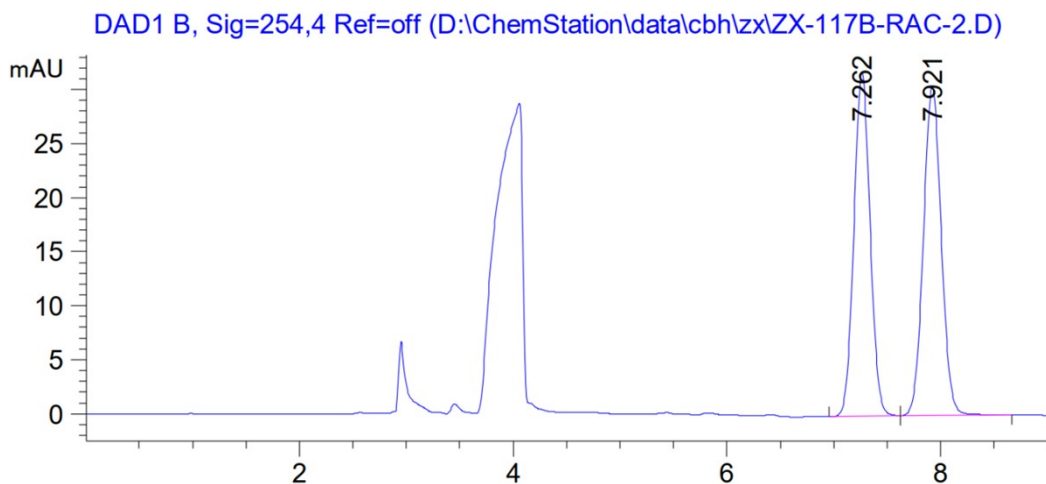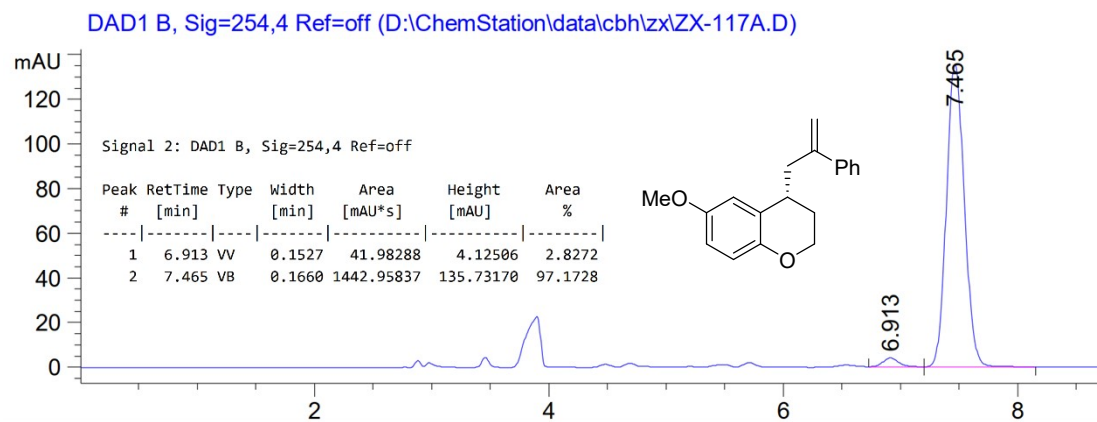

### Compound 3ac

DAD1 H, Sig=290,4 Ref=off (D:\ChemStation\data\cbh\zx\ZX-110B-RAC-4.D)

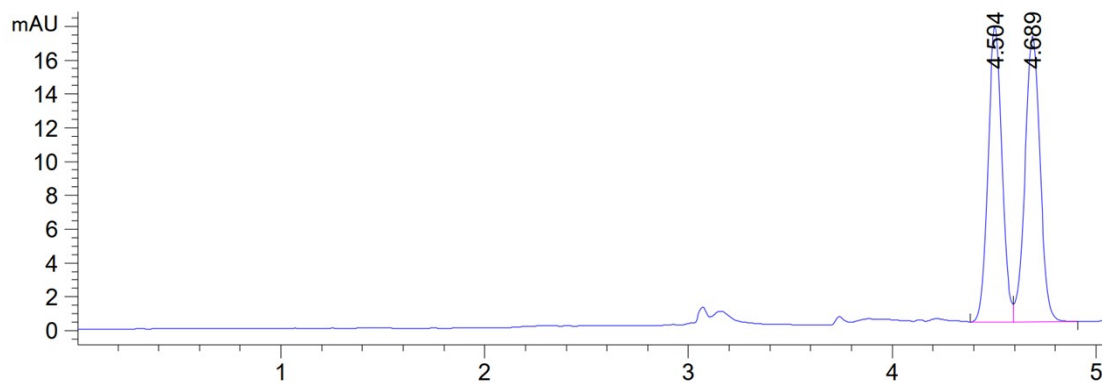

DAD1 H, Sig=290,4 Ref=off (D:\ChemStation\data\cbh\zx\ZX-110A.D)

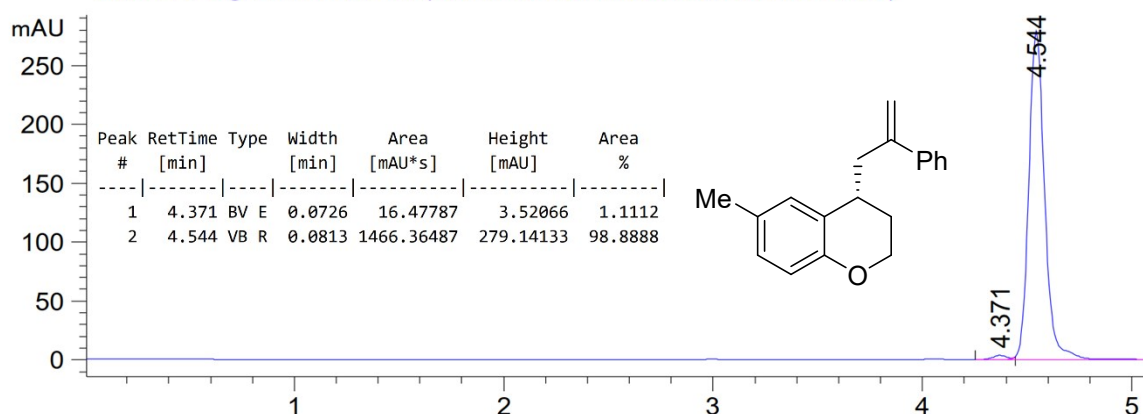

### Compound 3ad

DAD1 D, Sig=254,4 Ref=off (D:\ChemStation\data\cbh\zx\ZX-106B-RAC.D)

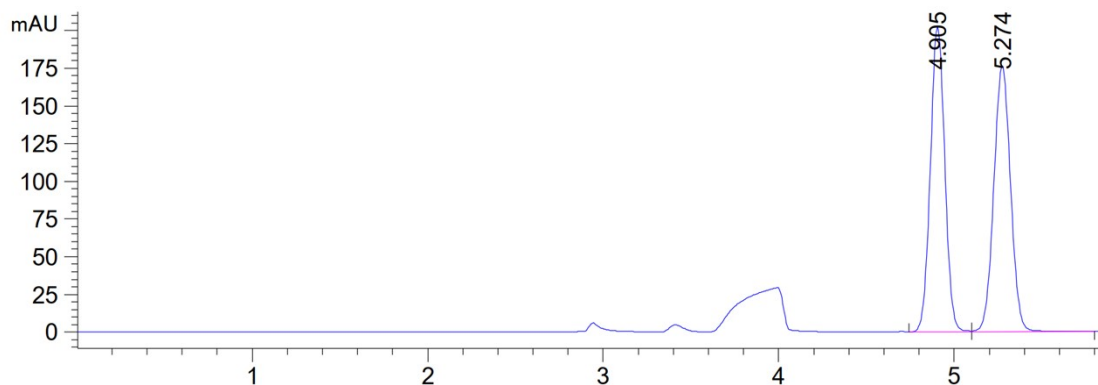

DAD1 D, Sig=254,4 Ref=off (D:\ChemStation\data\cbh\zx\zx-106a-0604-3.D)

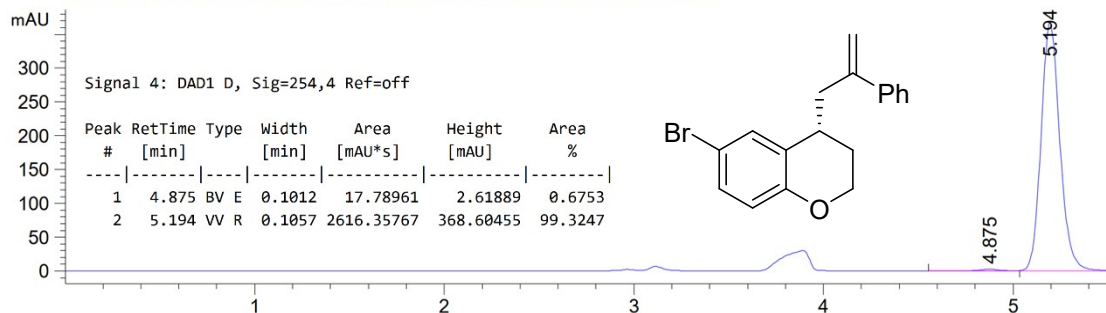

### Compound 3ae

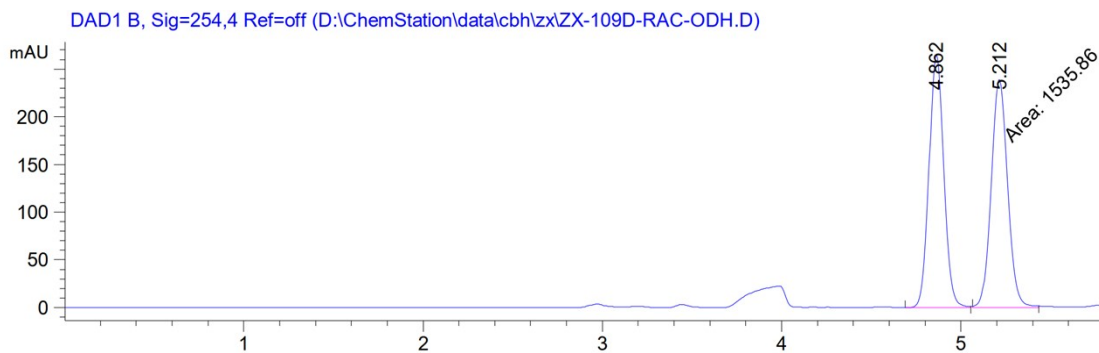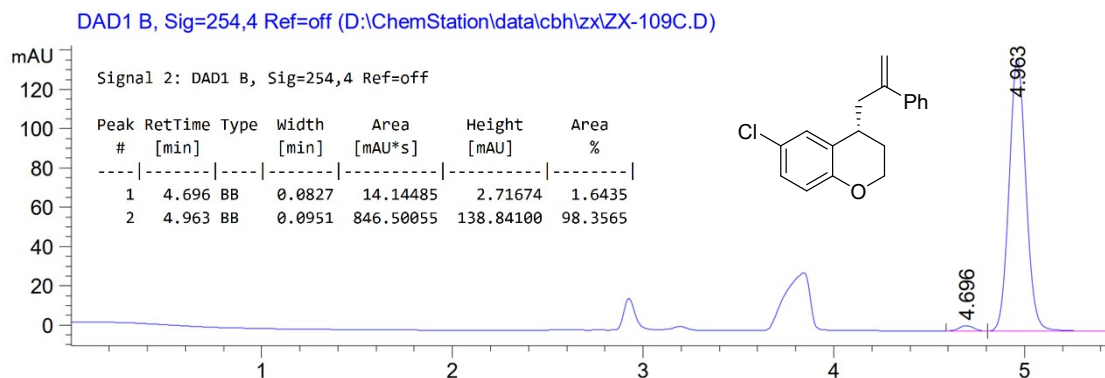

### Compound 3af

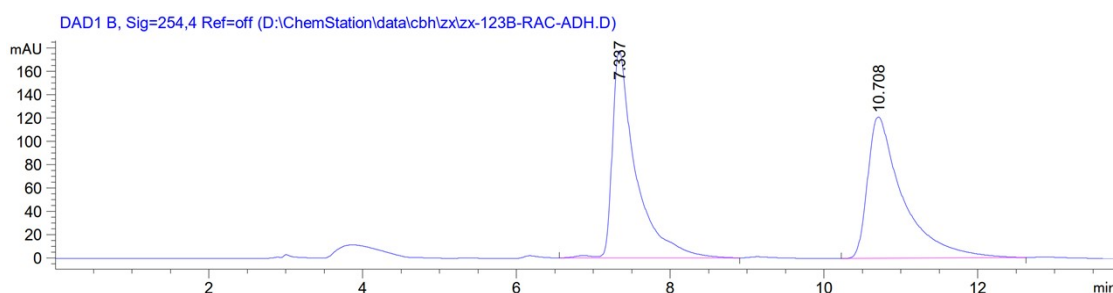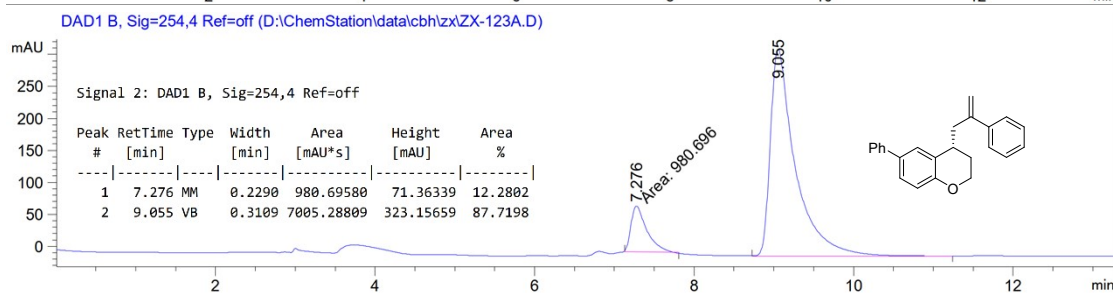

### Compound 3ag

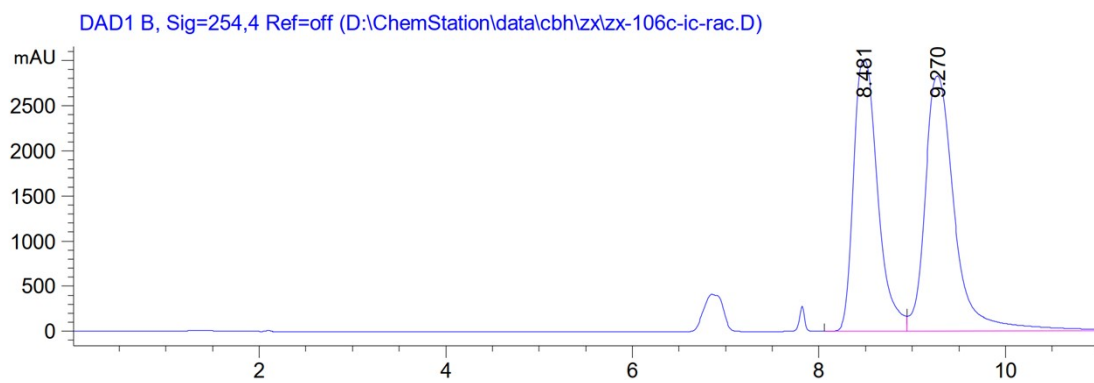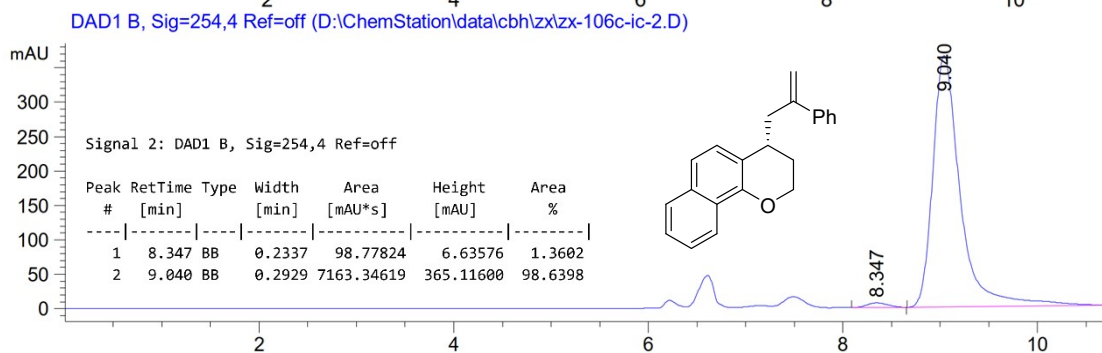

## Compound 3ah

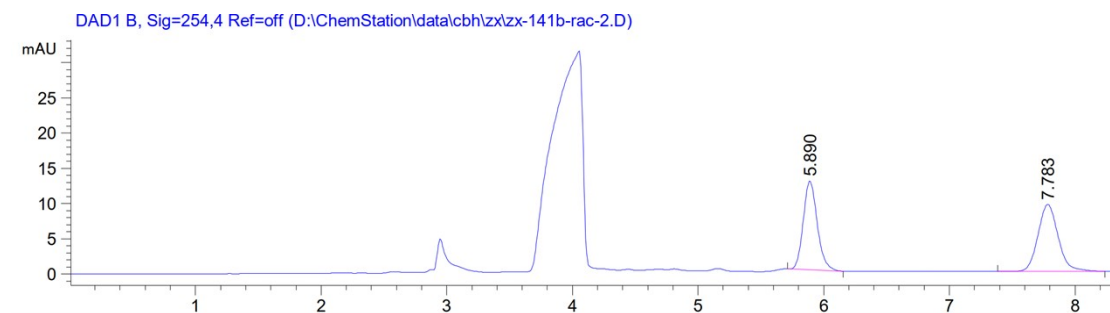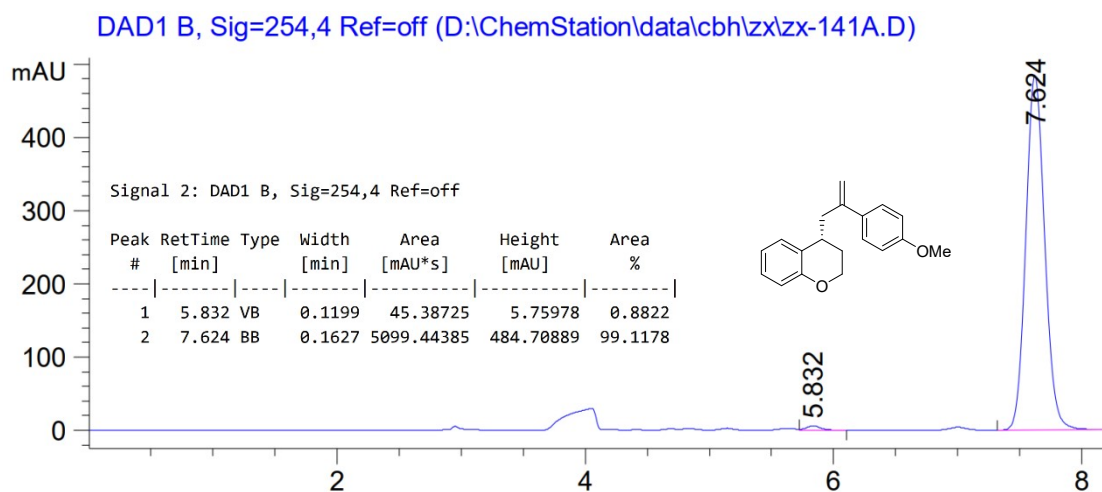

## Compound 3ai

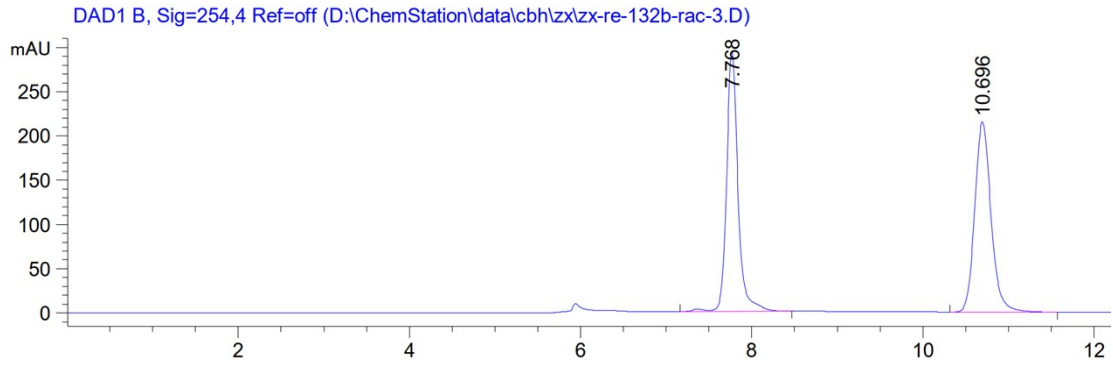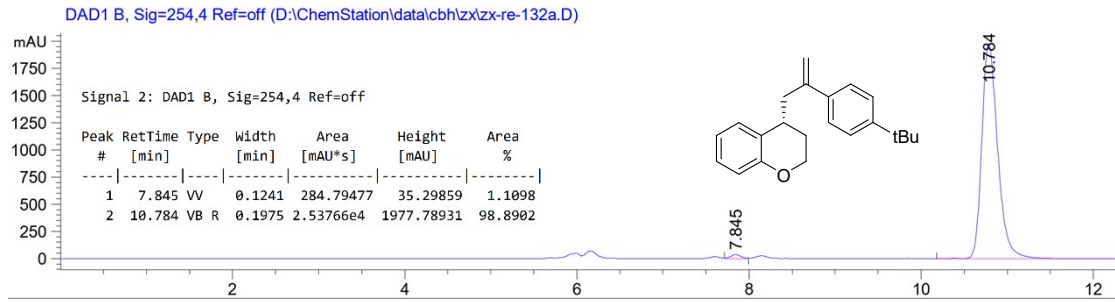

## Compound 3aj

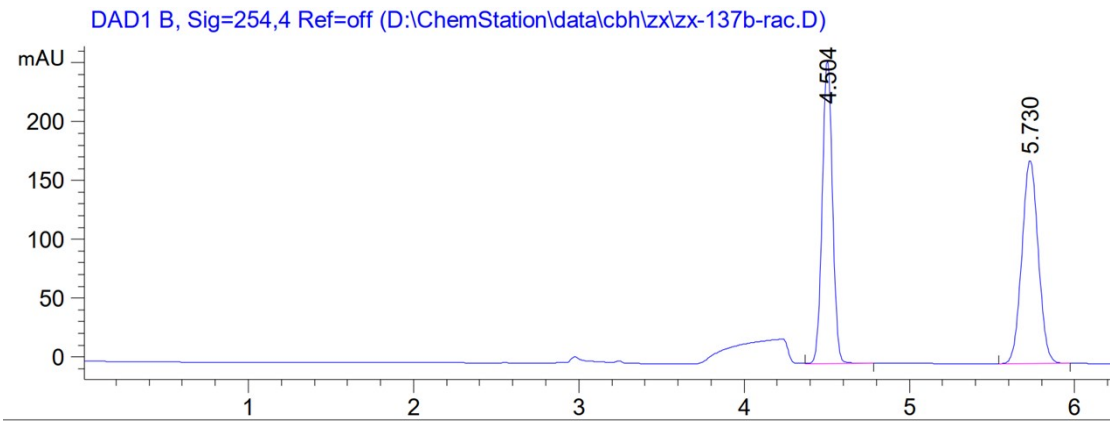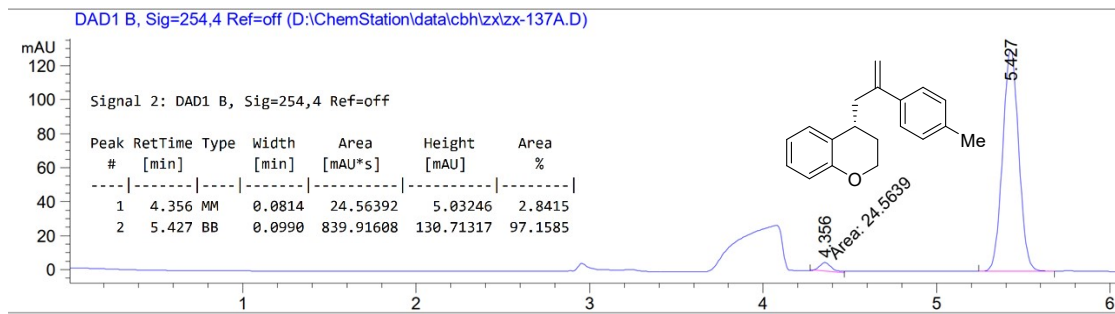

## Compound 3ak

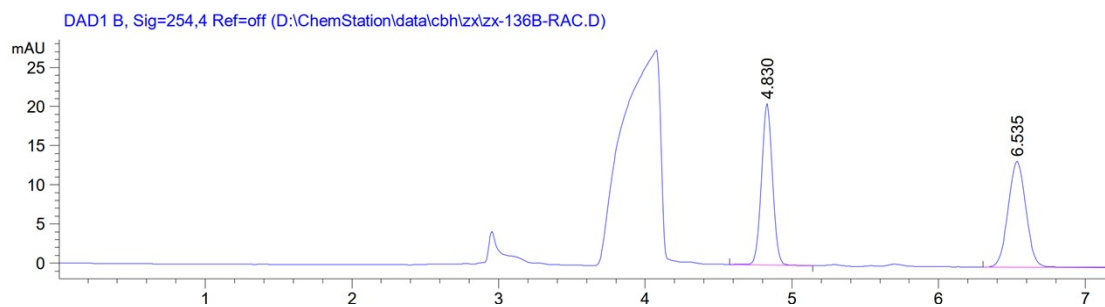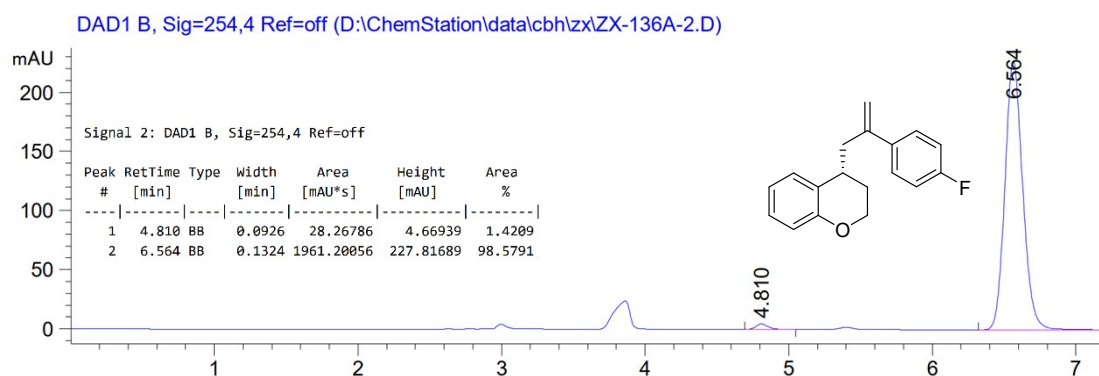

## Compound 3al

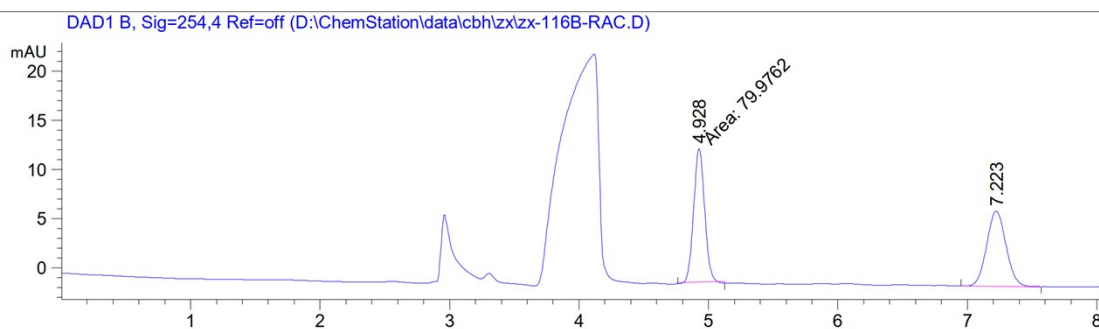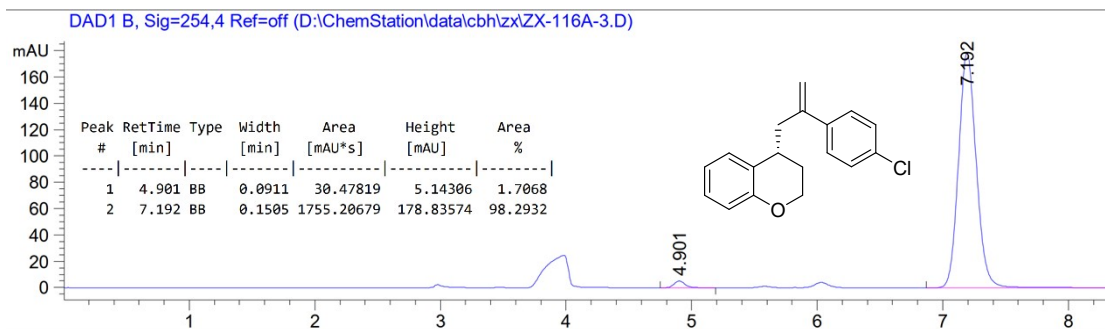

## Compound 3am

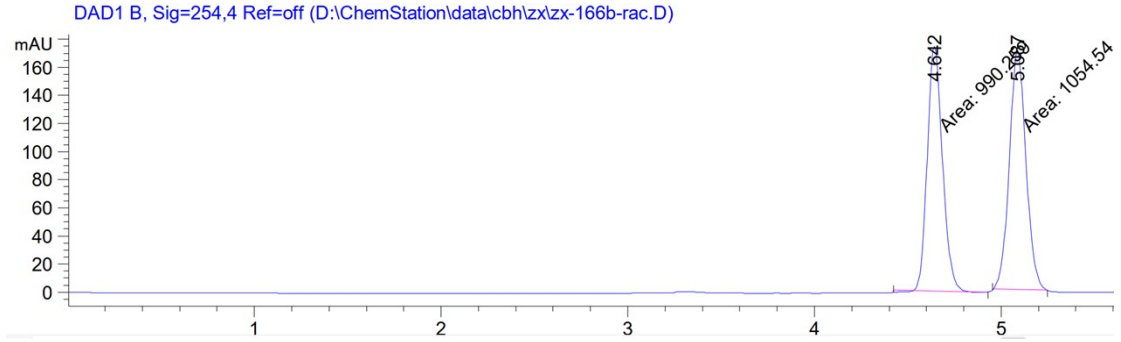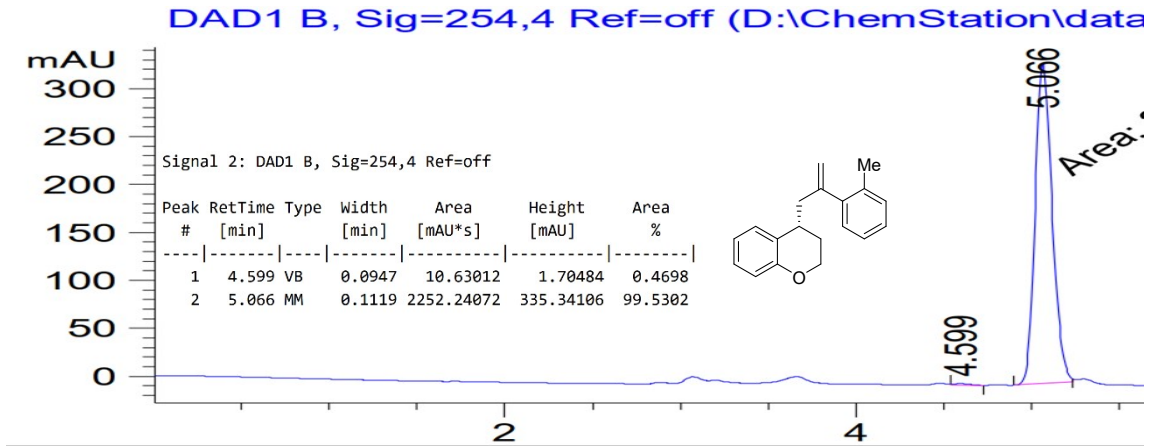

### Compound 3an

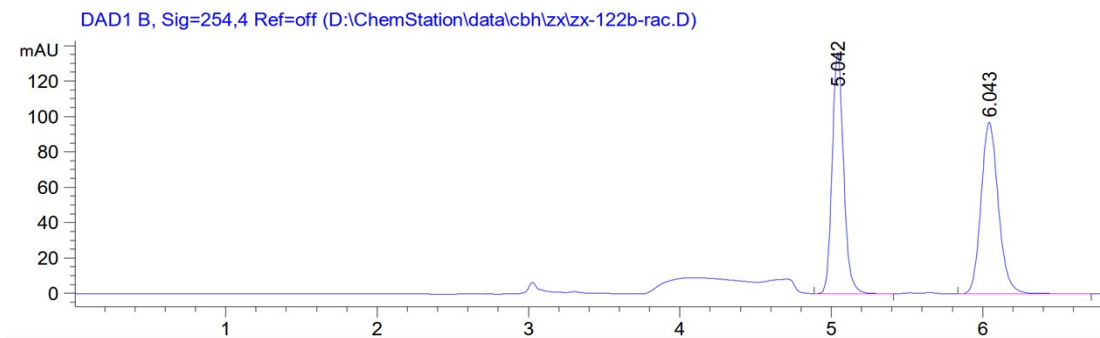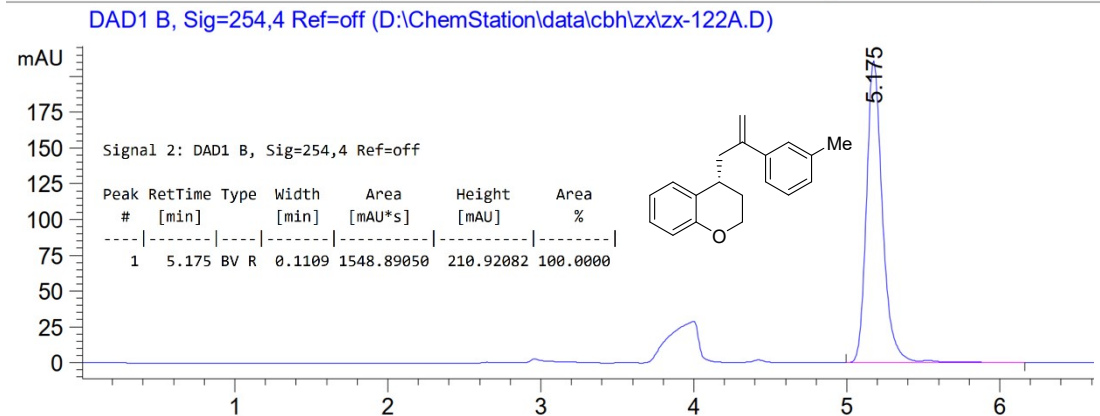

### Compound 3ao



DAD1 B, Sig=254,4 Ref=off (D:\ChemStation\data\cbh\zx\ZX-153B-XIA-RAC.D)

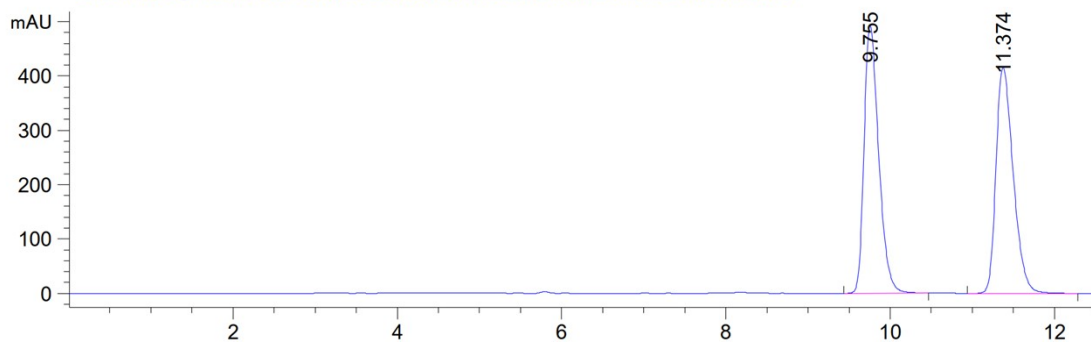

DAD1 B, Sig=254,4 Ref=off (D:\ChemStation\data\cbh\zx\zx-153A.D)

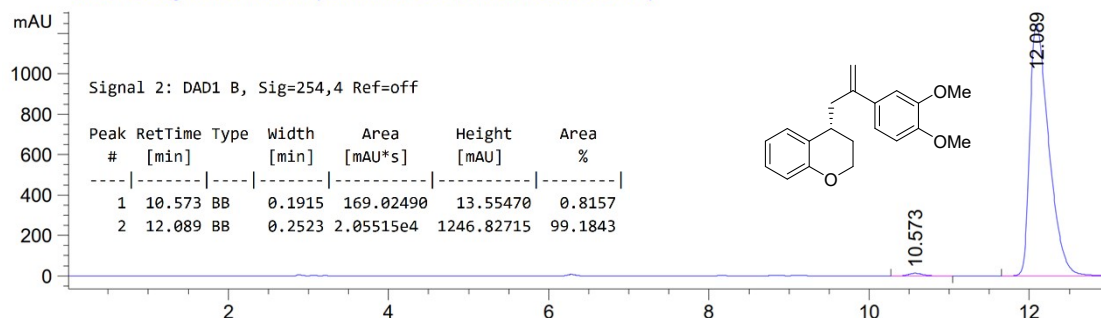

### Compound 3ap

DAD1 A, Sig=254,4 Ref=360,100 (D:\data\CBH\zx\zx-156b-rac.D)

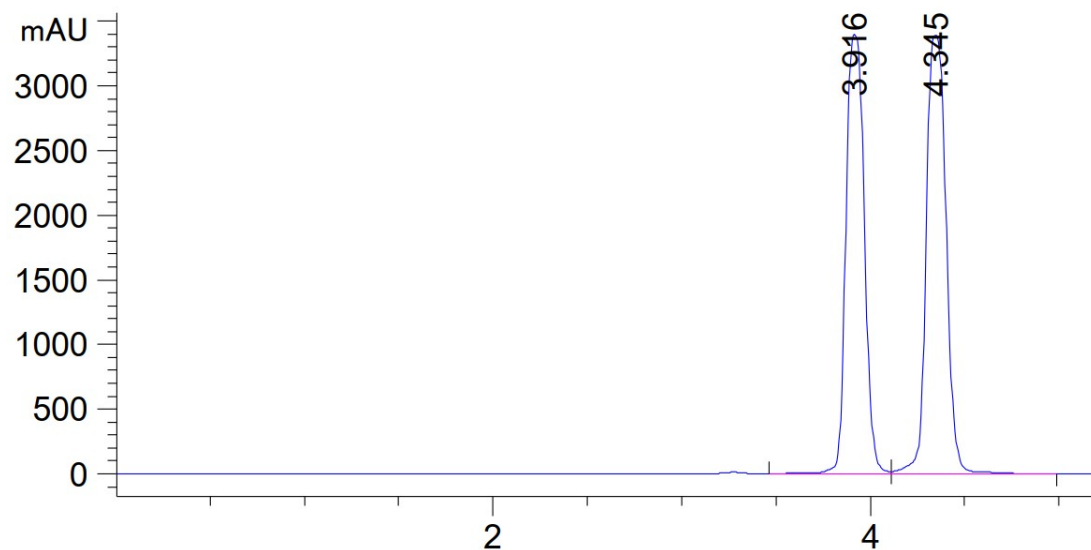

Signal 1: DAD1 A, Sig=254,4 Ref=360,100

| Peak # | RetTime [min] | Type | Width [min] | Area [mAU*s] | Height [mAU] | Area %  |
|--------|---------------|------|-------------|--------------|--------------|---------|
| 1      | 4.093         | BV E | 0.0825      | 125.71877    | 23.46672     | 4.0441  |
| 2      | 4.317         | VB R | 0.0823      | 2982.98145   | 558.38873    | 95.9559 |

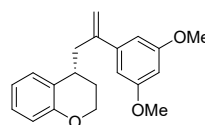

DAD1 A, Sig=254,4 Ref=360,100 (D:\data\CBH\zx\zx-156A.D)

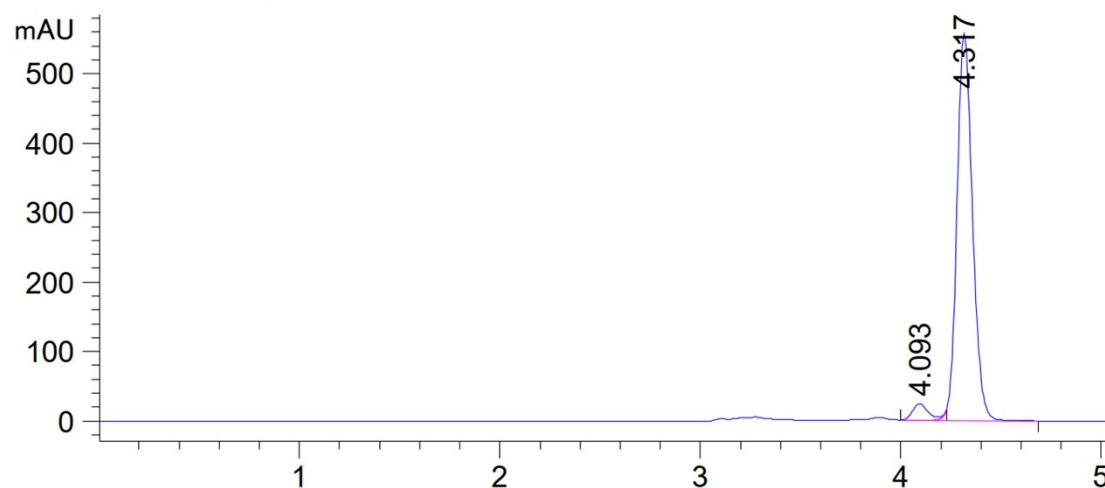

### Compound 3aq

DAD1 B, Sig=254,4 Ref=off (D:\ChemStation\data\cbh\zx\zx-167b-rac.D)

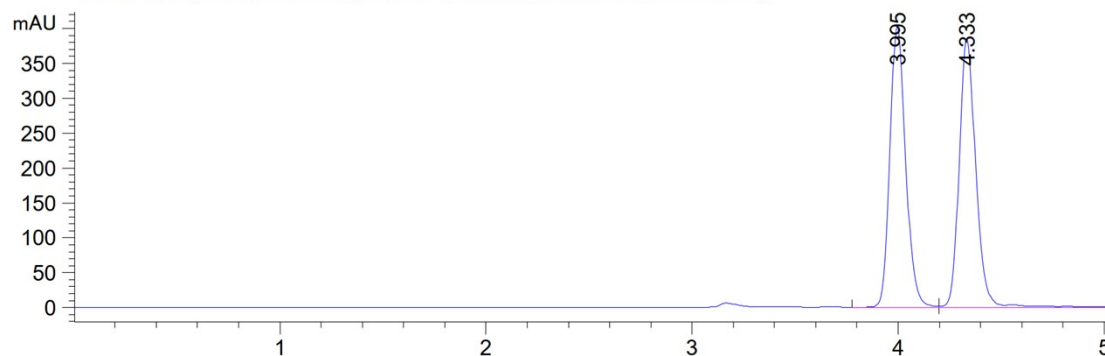

DAD1 B, Sig=254,4 Ref=off (D:\ChemStation\data\cbh\zx\zx-167A-3.D)

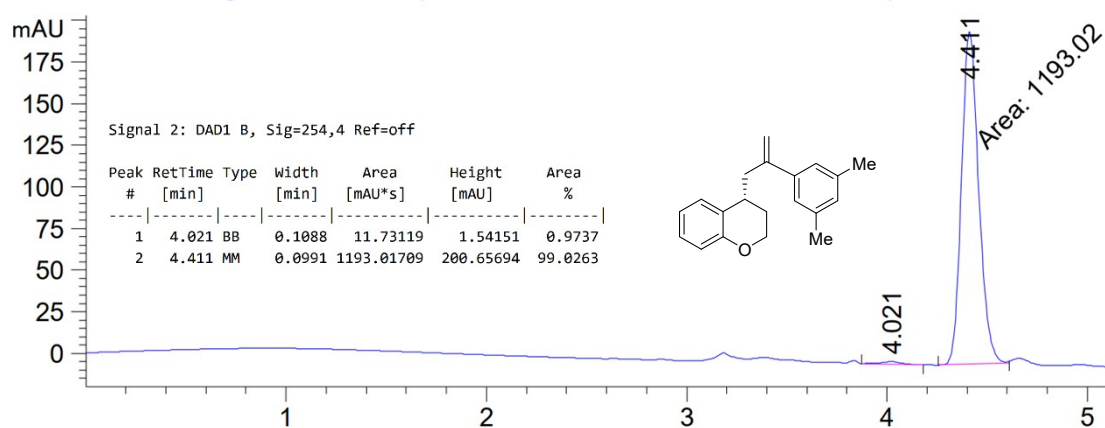

### Compound 3ar

DAD1 D, Sig=230,4 Ref=off (D:\ChemStation\data\cbh\zx\zx-133B-rac-0807.D)

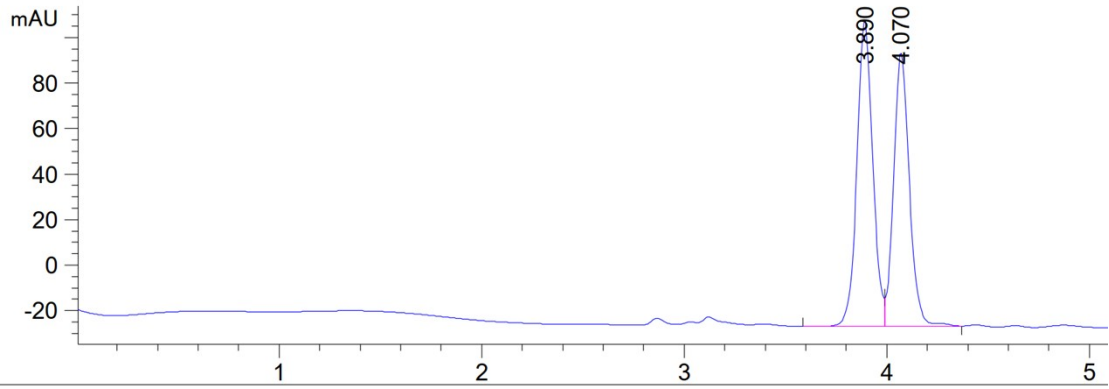

DAD1 D, Sig=230,4 Ref=off (D:\ChemStation\data\cbh\zx\zx-133A-0807.D)

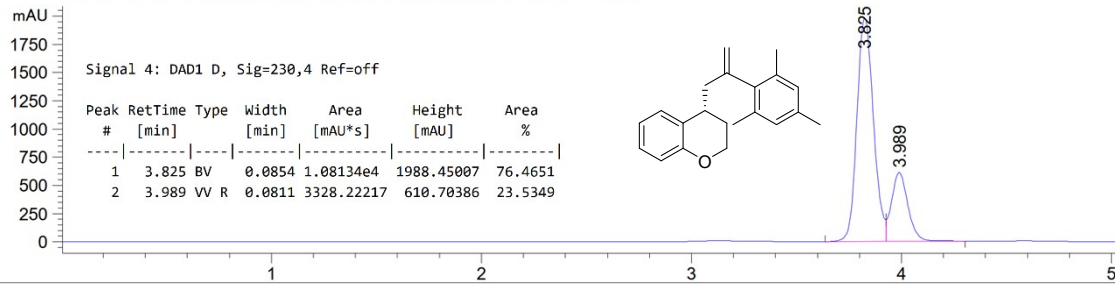

### Compound 3as

DAD1 B, Sig=254,4 Ref=off (D:\ChemStation\data\cbh\zx\zx-145B-RAC-2.D)

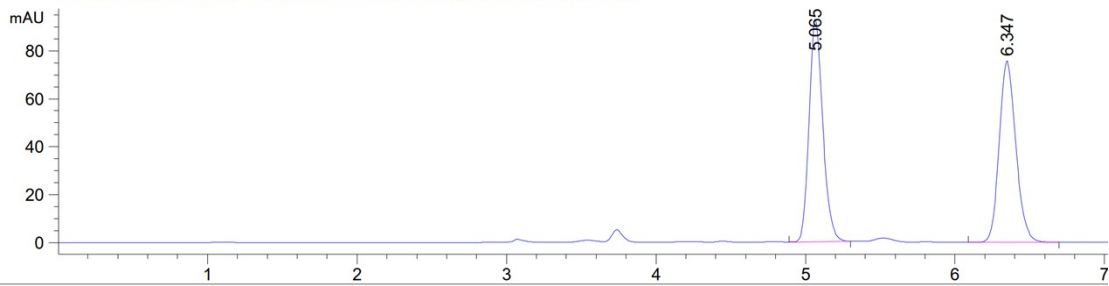

DAD1 B, Sig=254,4 Ref=off (D:\ChemStation\data\cbh\zx\zx-145A.D)

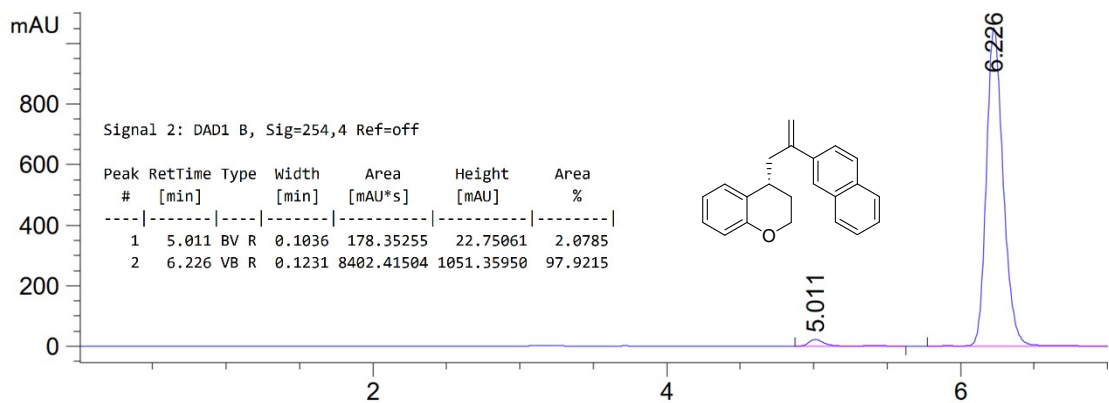

### Compound 3at

DAD1 B, Sig=254,4 Ref=off (D:\ChemStation\data\cbh\zx\ZX-111B-RAC.D)

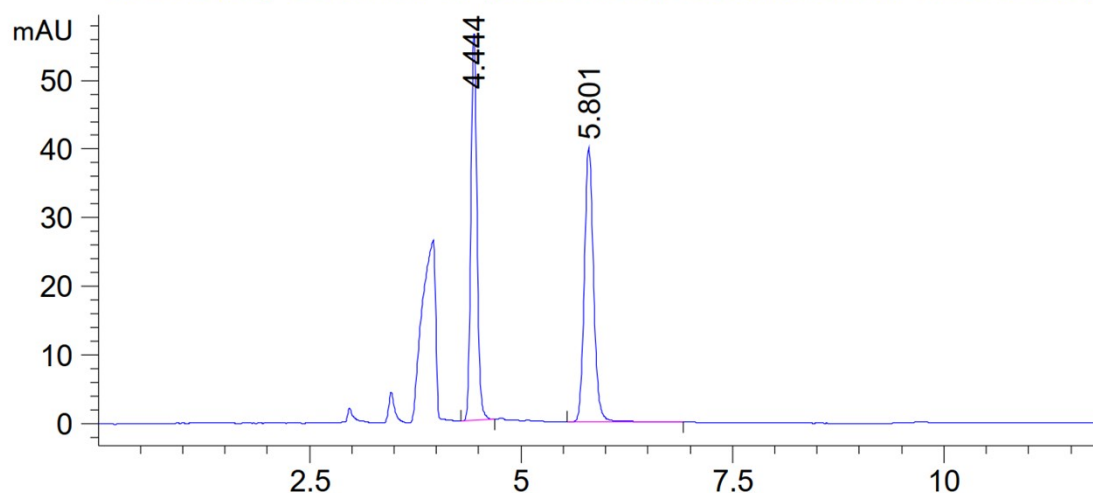

DAD1 B, Sig=254,4 Ref=off (D:\ChemStation\data\cbh\zx\ZX-111A-3-ME.D)

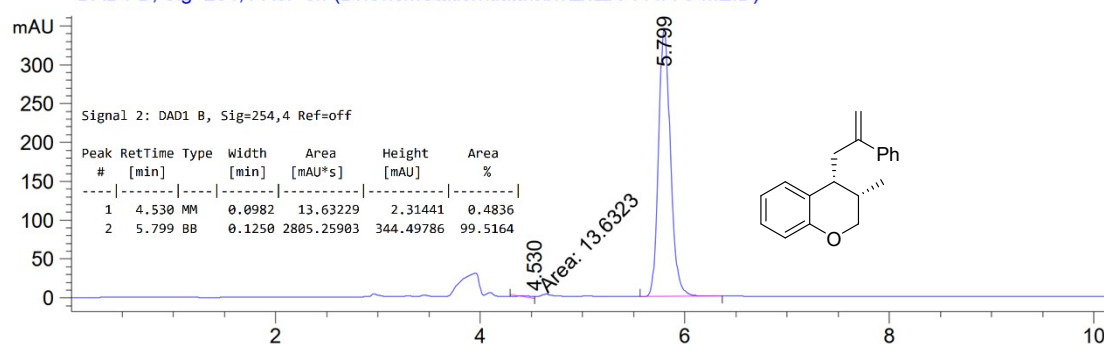

Compound 3au

DAD1 B, Sig=254,4 Ref=off (D:\ChemStation\data\cbh\zx\ZX-176A-RAC-6.D)

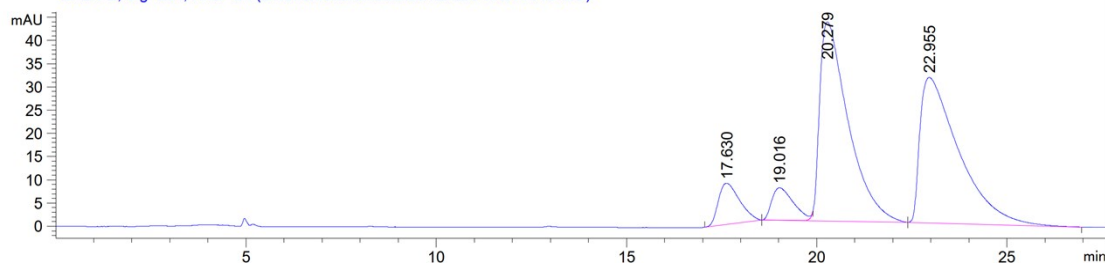

DAD1 B, Sig=254,4 Ref=off (D:\ChemStation\data\cbh\zx\ZX-176A-CAT-4.D)

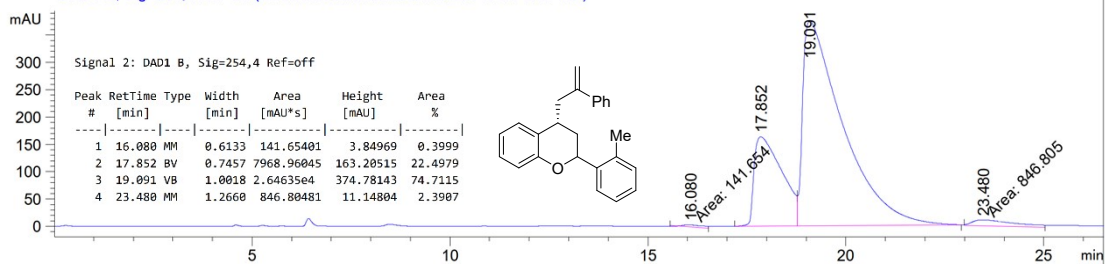

Compound 3av

DAD1 B, Sig=210,4 Ref=360,100 (D:\data\CBH\zx\zx-162B-RAC.D)

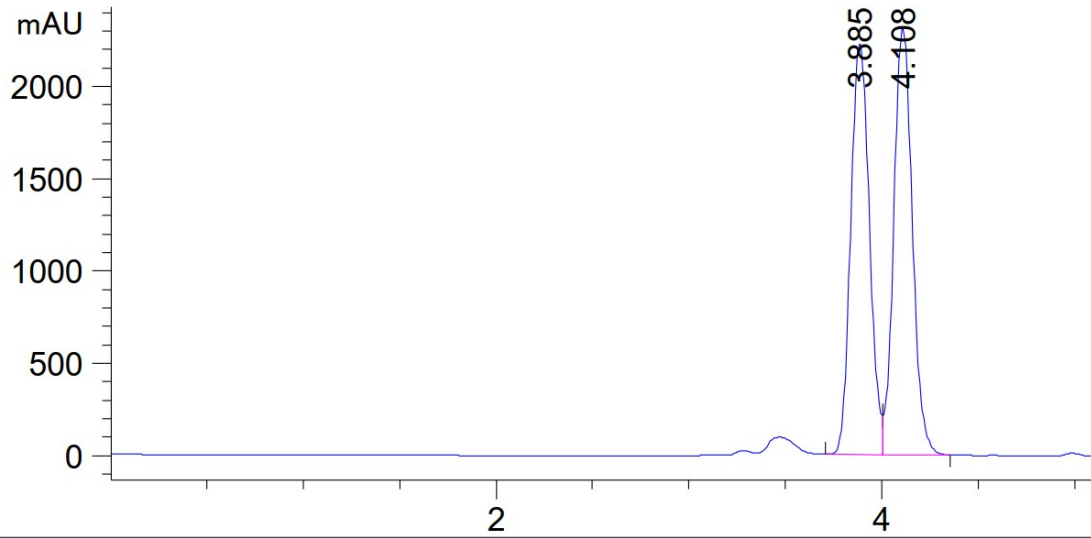

DAD1 B, Sig=210,4 Ref=360,100 (D:\data\CBH\zx\zx-162A.D)

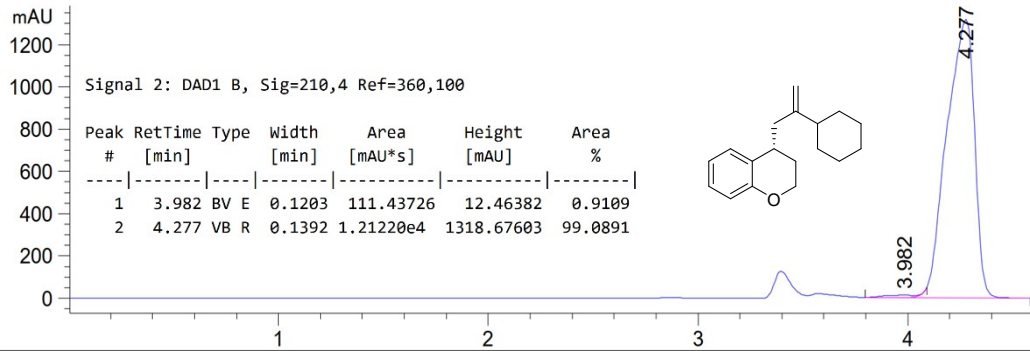

### Compound 3aw

DAD1 B, Sig=254,4 Ref=off (D:\ChemStation\data\cbh\zx\ZX-200-RAC-ODH.D)

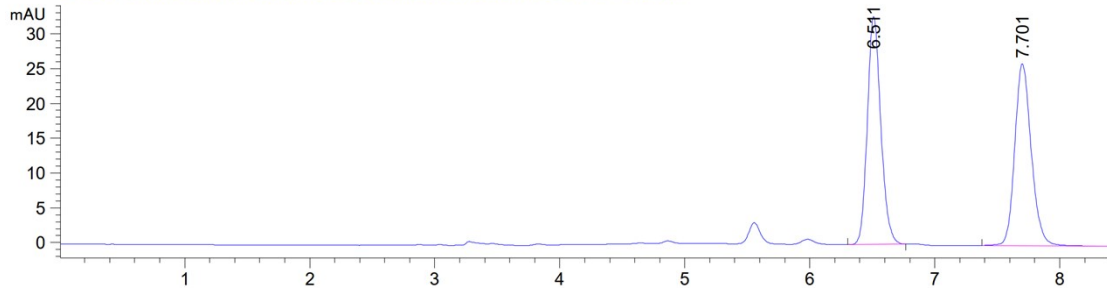

DAD1 B, Sig=254,4 Ref=off (D:\ChemStation\data\cbh\zx\ZX-200-CAT-ODH.D)

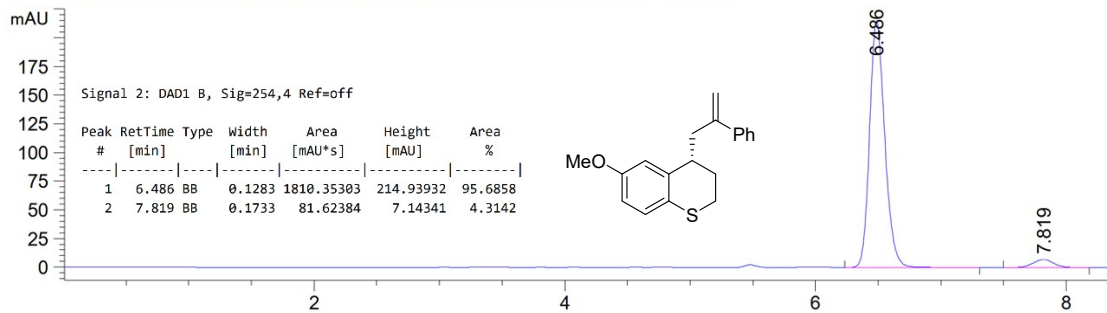

### Compound 3ax

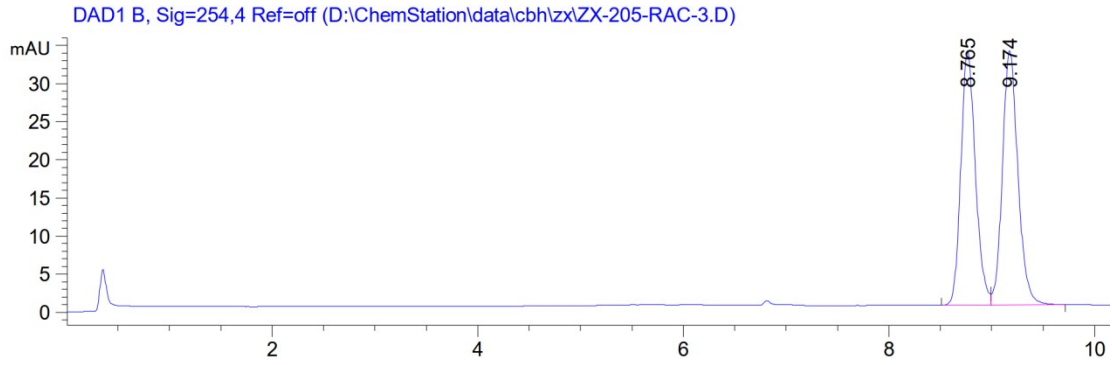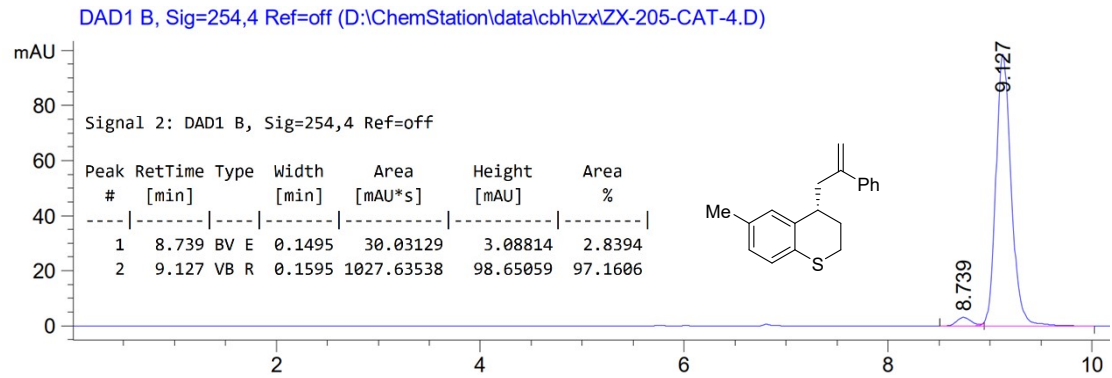

### Compound 3ay

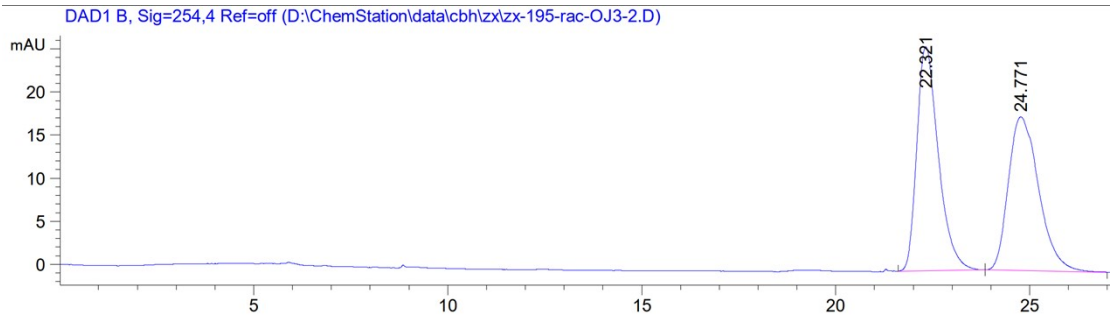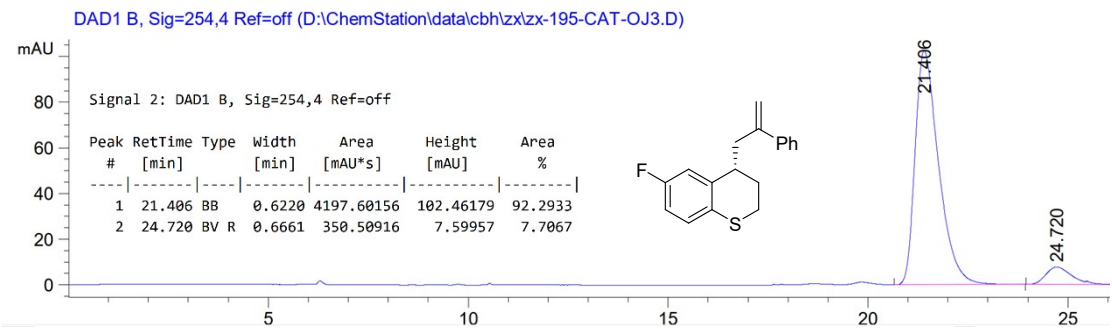

### Compound 3az

DAD1 B, Sig=254,4 Ref=off (D:\ChemStation\data\cbh\zx\ZX-193A-RAC-3.D)

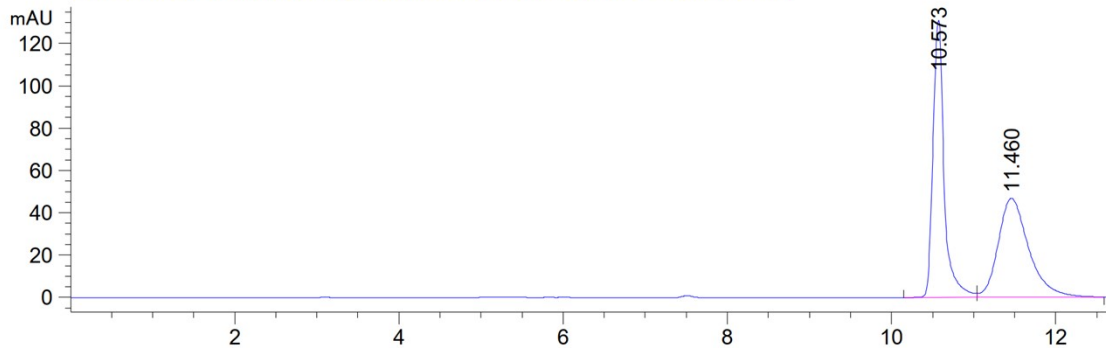

DAD1 B, Sig=254,4 Ref=off (D:\ChemStation\data\cbh\zx\ZX-193B-CAT-2.D)

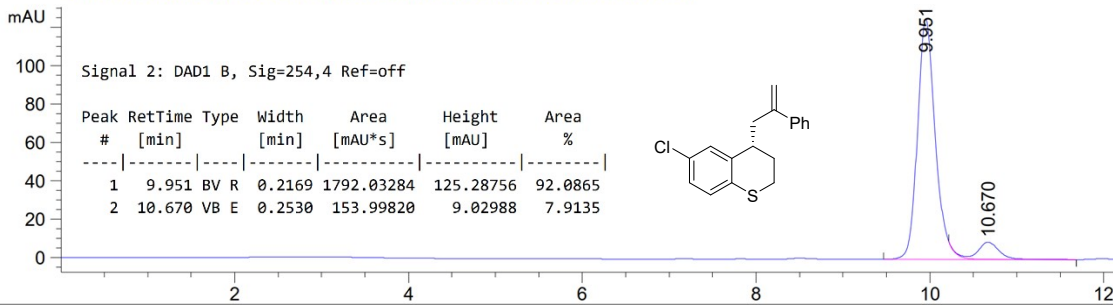

### Compound 3ba

DAD1 B, Sig=254,4 Ref=off (D:\ChemStation\data\cbh\zx\ZX-199-RAC-ODH)

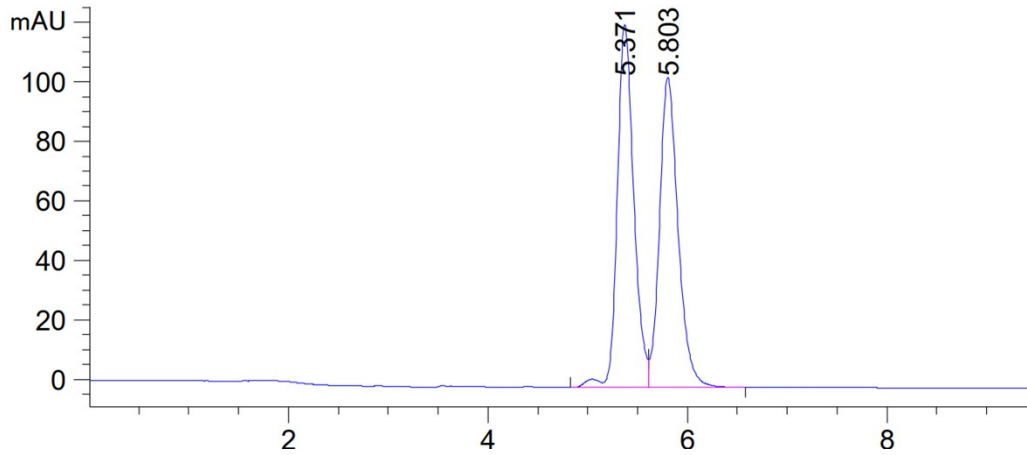

DAD1 B, Sig=254,4 Ref=off (D:\CHEMSTATION\DATA\CBH\ZX\ZX-199-CAT-ODH.D)

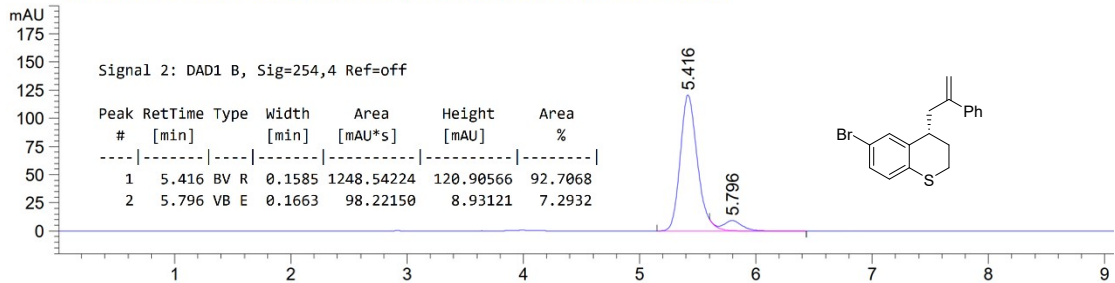

### Compound 3bb

DAD1 B, Sig=254,4 Ref=off (D:\ChemStation\data\cbh\zx\ZX-179D-RAC-ODH.D)

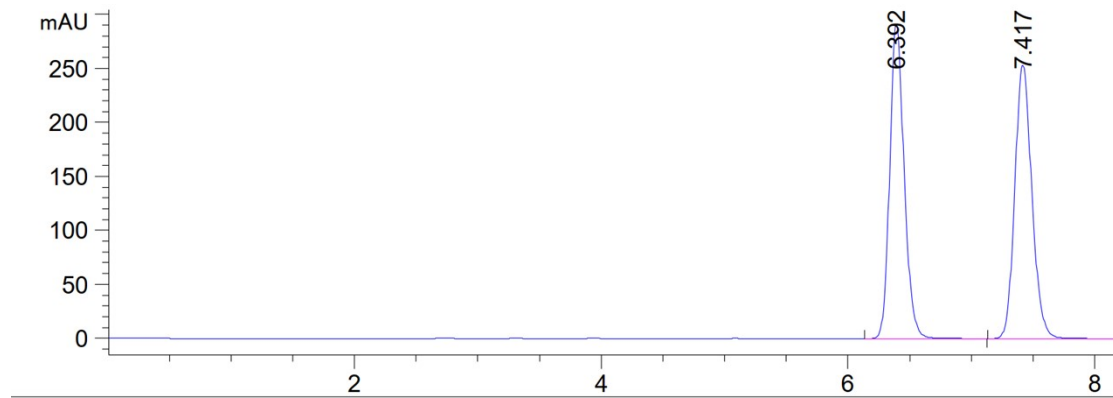

DAD1 B, Sig=254,4 Ref=off (D:\ChemStation\data\cbh\zx\ZX-179D-CAT-ODH.D)

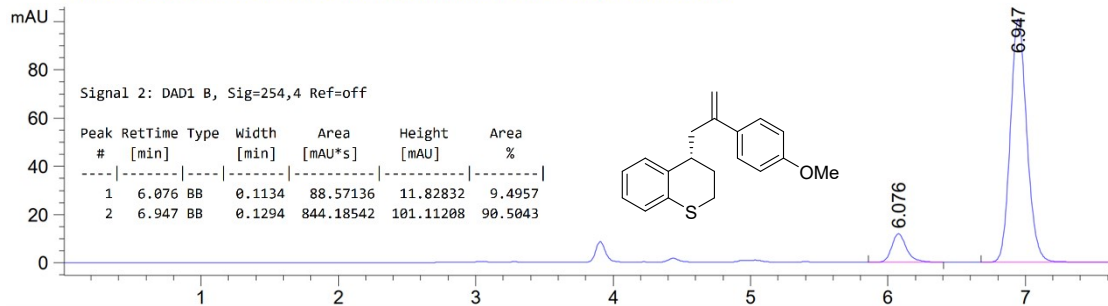

### Compound 3bc

DAD1 B, Sig=254,4 Ref=off (D:\ChemStation\data\cbh\zx\ZX-179A-RAC-ODH.D)

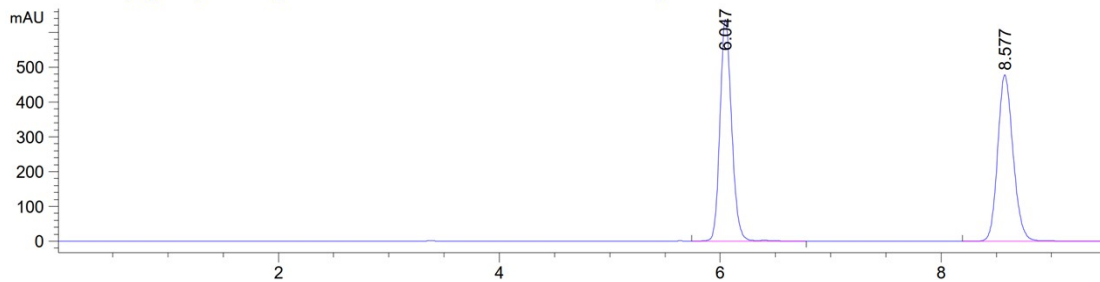

DAD1 B, Sig=254,4 Ref=off (D:\ChemStation\data\cbh\zx\ZX-179A-CAT-ODH.D)

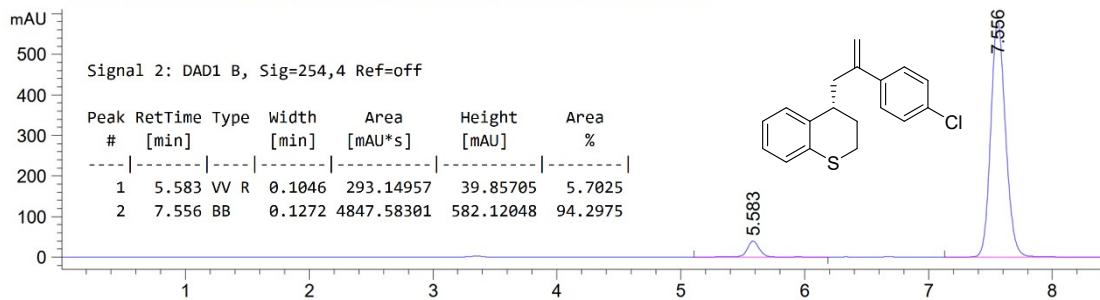

### Compound 3bd



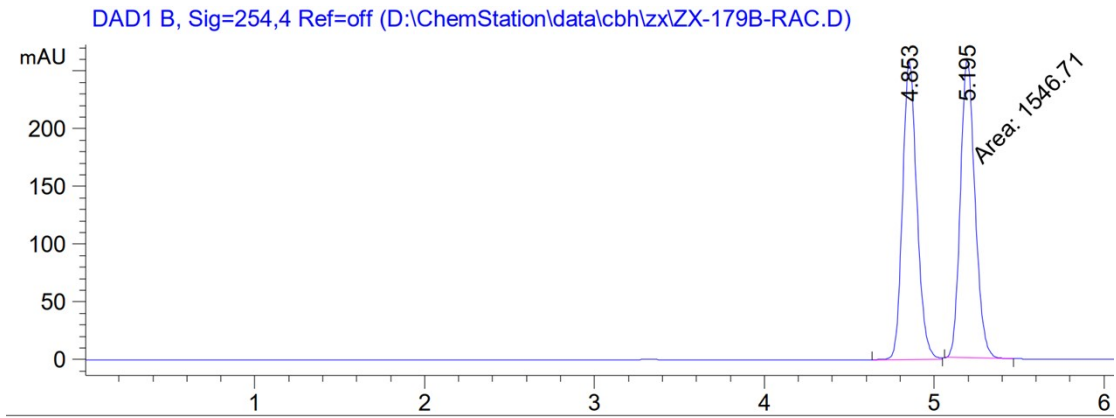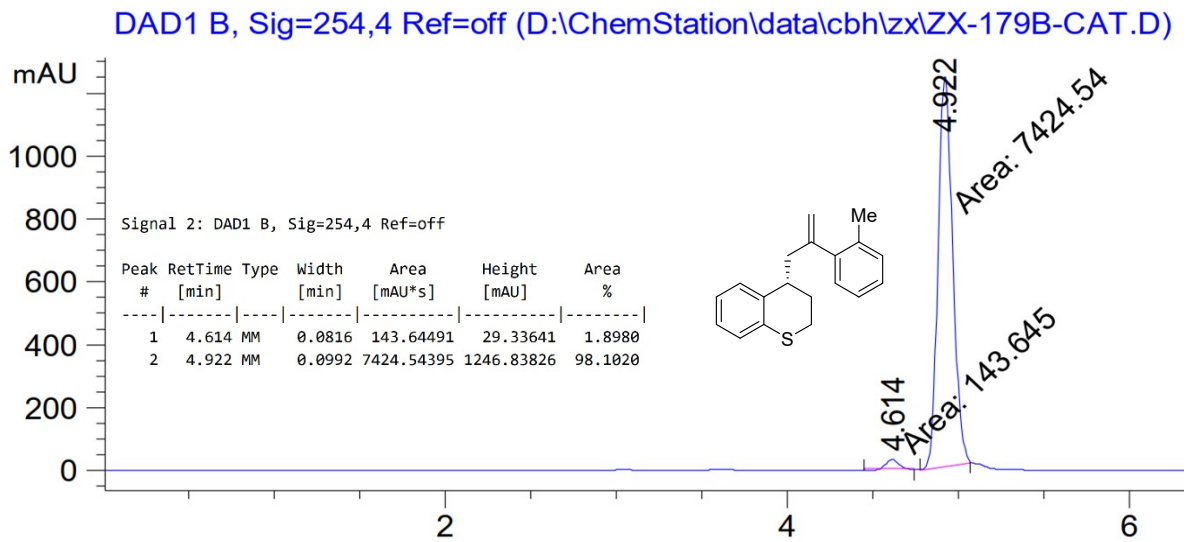

### Compound 3be

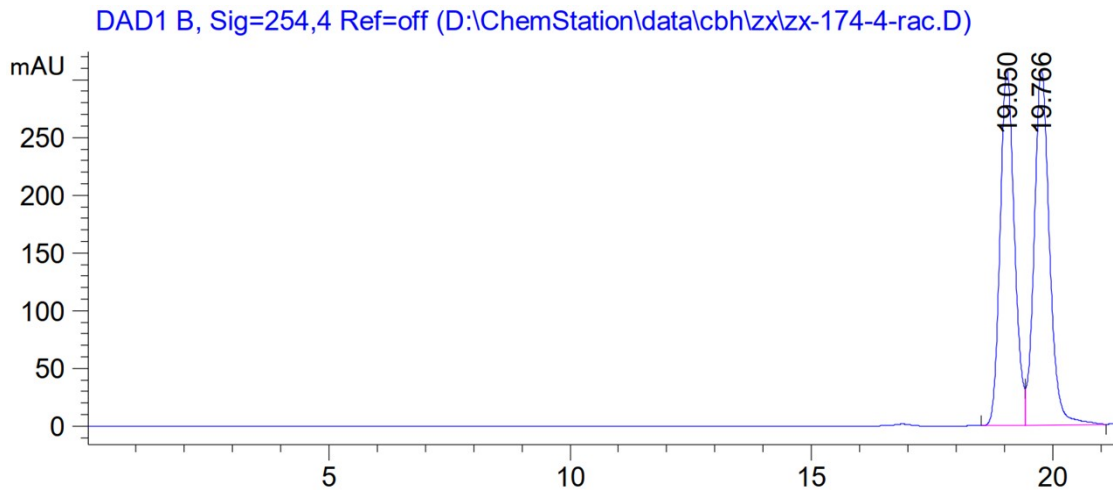

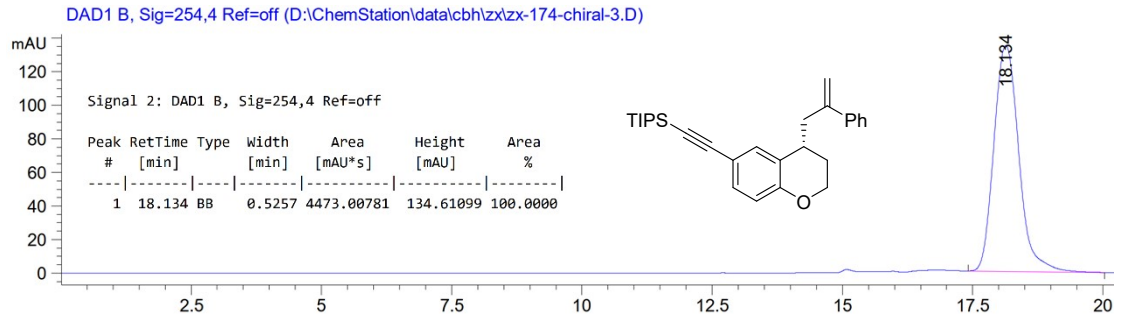

## Compound 3bf

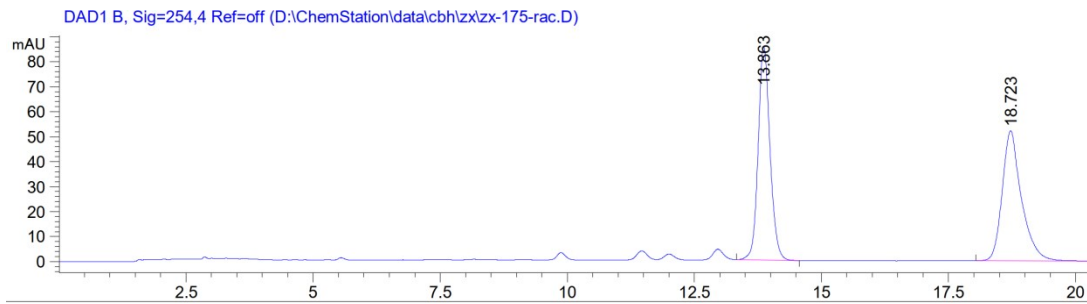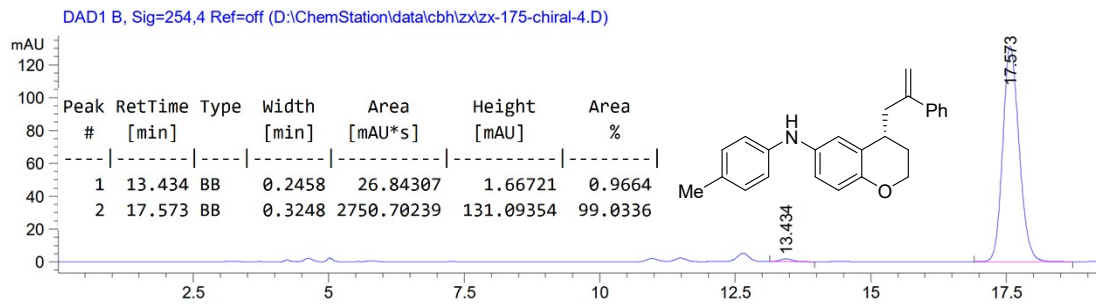

## 7. Study of time of LPS on RAW 264.7 cell

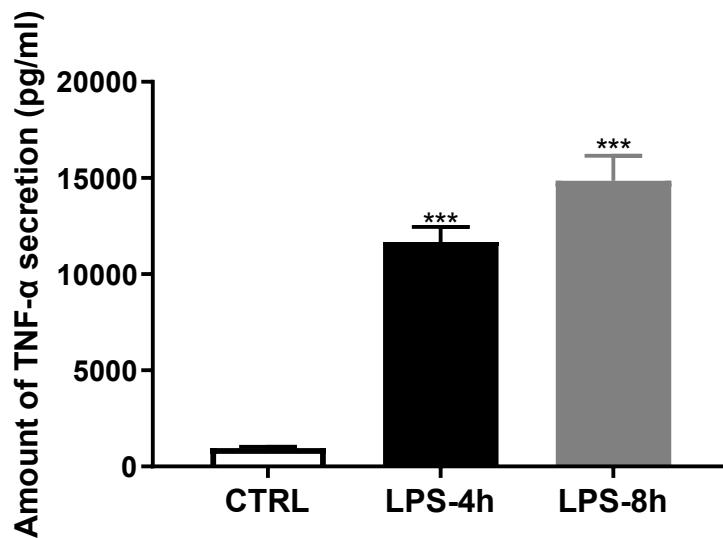

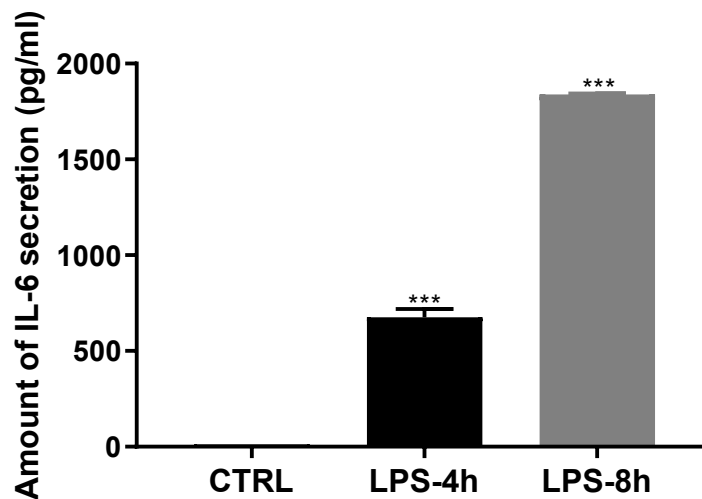

**Figure S1. Different time and concentration of LPS on ELISA assay experiments.** RAW 264.7 cells were plated in a 96-well plate and treated with LPS. The culture supernatant was collected. The concentrations of IL-6 and TNF- $\alpha$  in the culture supernatant of RAW 264.7 cells were determined according to the manufacturer's instructions of the Duo-set ELISA kits, purchased from Jomln Co. Ltd. (Shanghai, China). The absorbance was measured at 450 nm. Data from three times independent experiments were expressed as means  $\pm$  SD. \* $p < 0.05$  compared with the control group.

#### References

1. M. V. Vita, P. Caramenti and J. Waser, *Organic Letters*, 2015, **17**, 5832-5835.
